# Supplementary material for: Late Pleistocene to late Holocene palaeoecology and human foraging at Kuumbi Cave, Zanzibar Island
Source: Frontiers journal article supplement (doi:10.3389/fearc.2023.1080785), 2023-04-18
Supplement: Table_2.XLSX [file Table_2.XLSX]

## Sheet: KCFINAL
Region/Site	Site	Phase	Context	Age	Taxon	d13C	d18O	DIET		Full Reference
L. Turkana	514			6000 - 7000 BP	Alcelaphine	1.98	-0.23	Grazer		Chritz, K. L., Cerling, T. E., Freeman, K. H., Hildebrand, E. A., Janzen, A., & Prendergast, M. E. (2019). Climate, ecology, and the spread of herding in eastern Africa. Quaternary Science Reviews, 204, 119-132.
L. Turkana	514			6000 - 7000 BP	Equus sp.	-0.19	2.45	Grazer		Chritz, K. L., Cerling, T. E., Freeman, K. H., Hildebrand, E. A., Janzen, A., & Prendergast, M. E. (2019). Climate, ecology, and the spread of herding in eastern Africa. Quaternary Science Reviews, 204, 119-132.
L. Turkana	514			6000 - 7000 BP	Equus sp.	0.22	3.76	Grazer		Chritz, K. L., Cerling, T. E., Freeman, K. H., Hildebrand, E. A., Janzen, A., & Prendergast, M. E. (2019). Climate, ecology, and the spread of herding in eastern Africa. Quaternary Science Reviews, 204, 119-132.
L. Turkana	514			6000 - 7000 BP	Equus sp.	1.26	3.57	Grazer		Chritz, K. L., Cerling, T. E., Freeman, K. H., Hildebrand, E. A., Janzen, A., & Prendergast, M. E. (2019). Climate, ecology, and the spread of herding in eastern Africa. Quaternary Science Reviews, 204, 119-132.
L. Turkana	514			6000 - 7000 BP	Hippopotamus amphibius	-0.64	-2.06	Grazer		Chritz, K. L., Cerling, T. E., Freeman, K. H., Hildebrand, E. A., Janzen, A., & Prendergast, M. E. (2019). Climate, ecology, and the spread of herding in eastern Africa. Quaternary Science Reviews, 204, 119-132.
L. Turkana	514			6000 - 7000 BP	Phacochoerus sp.	0.42	-0.93	Grazer		Chritz, K. L., Cerling, T. E., Freeman, K. H., Hildebrand, E. A., Janzen, A., & Prendergast, M. E. (2019). Climate, ecology, and the spread of herding in eastern Africa. Quaternary Science Reviews, 204, 119-132.
L. Turkana	514			6000 - 7000 BP	Phacochoerus sp.	2.25	3.73	Grazer		Chritz, K. L., Cerling, T. E., Freeman, K. H., Hildebrand, E. A., Janzen, A., & Prendergast, M. E. (2019). Climate, ecology, and the spread of herding in eastern Africa. Quaternary Science Reviews, 204, 119-132.
L. Turkana	AW			7000 - 8000 BP	Mammal	-1.21	2.22	Grazer		Chritz, K. L., Cerling, T. E., Freeman, K. H., Hildebrand, E. A., Janzen, A., & Prendergast, M. E. (2019). Climate, ecology, and the spread of herding in eastern Africa. Quaternary Science Reviews, 204, 119-132.
L. Turkana	AW			7000 - 8000 BP	Hippopotamus amphibius	-1.19	-2.16	Grazer		Chritz, K. L., Cerling, T. E., Freeman, K. H., Hildebrand, E. A., Janzen, A., & Prendergast, M. E. (2019). Climate, ecology, and the spread of herding in eastern Africa. Quaternary Science Reviews, 204, 119-132.
L. Turkana	AW			7000 - 8000 BP	Hippopotamus amphibius	-0.72	-2.21	Grazer		Chritz, K. L., Cerling, T. E., Freeman, K. H., Hildebrand, E. A., Janzen, A., & Prendergast, M. E. (2019). Climate, ecology, and the spread of herding in eastern Africa. Quaternary Science Reviews, 204, 119-132.
L. Turkana	AW			7000 - 8000 BP	Hippopotamus amphibius	0.03	-2.23	Grazer		Chritz, K. L., Cerling, T. E., Freeman, K. H., Hildebrand, E. A., Janzen, A., & Prendergast, M. E. (2019). Climate, ecology, and the spread of herding in eastern Africa. Quaternary Science Reviews, 204, 119-132.
L. Turkana	AW			7000 - 8000 BP	Hippopotamus amphibius	0.57	0.9	Grazer		Chritz, K. L., Cerling, T. E., Freeman, K. H., Hildebrand, E. A., Janzen, A., & Prendergast, M. E. (2019). Climate, ecology, and the spread of herding in eastern Africa. Quaternary Science Reviews, 204, 119-132.
L. Turkana	AW			7000 - 8000 BP	Hippopotamus amphibius	1.8	-0.33	Grazer		Chritz, K. L., Cerling, T. E., Freeman, K. H., Hildebrand, E. A., Janzen, A., & Prendergast, M. E. (2019). Climate, ecology, and the spread of herding in eastern Africa. Quaternary Science Reviews, 204, 119-132.
L. Turkana	AW			7000 - 8000 BP	Hippopotamus amphibius	2.92	0.34	Grazer		Chritz, K. L., Cerling, T. E., Freeman, K. H., Hildebrand, E. A., Janzen, A., & Prendergast, M. E. (2019). Climate, ecology, and the spread of herding in eastern Africa. Quaternary Science Reviews, 204, 119-132.
L. Turkana	AW			7000 - 8000 BP	Phacochoerus sp.	-0.18	-2.23	Grazer		Chritz, K. L., Cerling, T. E., Freeman, K. H., Hildebrand, E. A., Janzen, A., & Prendergast, M. E. (2019). Climate, ecology, and the spread of herding in eastern Africa. Quaternary Science Reviews, 204, 119-132.
L. Turkana	AW			7000 - 8000 BP	Phacochoerus sp.	2.48	5.07	Grazer		Chritz, K. L., Cerling, T. E., Freeman, K. H., Hildebrand, E. A., Janzen, A., & Prendergast, M. E. (2019). Climate, ecology, and the spread of herding in eastern Africa. Quaternary Science Reviews, 204, 119-132.
L. Turkana	AW			7000 - 8000 BP	Reduncini	0.2	-2.38	Grazer		Chritz, K. L., Cerling, T. E., Freeman, K. H., Hildebrand, E. A., Janzen, A., & Prendergast, M. E. (2019). Climate, ecology, and the spread of herding in eastern Africa. Quaternary Science Reviews, 204, 119-132.
L. Turkana	Equid Site			8000 - 10000 BP	Alcelaphine	0.48	3.02	Grazer		Chritz, K. L., Cerling, T. E., Freeman, K. H., Hildebrand, E. A., Janzen, A., & Prendergast, M. E. (2019). Climate, ecology, and the spread of herding in eastern Africa. Quaternary Science Reviews, 204, 119-132.
L. Turkana	Equid Site			8000 - 10000 BP	Alcelaphine	1.37	6.19	Grazer		Chritz, K. L., Cerling, T. E., Freeman, K. H., Hildebrand, E. A., Janzen, A., & Prendergast, M. E. (2019). Climate, ecology, and the spread of herding in eastern Africa. Quaternary Science Reviews, 204, 119-132.
L. Turkana	Equid Site			8000 - 10000 BP	Alcelaphine	2.3	4.13	Grazer		Chritz, K. L., Cerling, T. E., Freeman, K. H., Hildebrand, E. A., Janzen, A., & Prendergast, M. E. (2019). Climate, ecology, and the spread of herding in eastern Africa. Quaternary Science Reviews, 204, 119-132.
L. Turkana	Equid Site			8000 - 10000 BP	Bovid	-0.87	2.14	Grazer		Chritz, K. L., Cerling, T. E., Freeman, K. H., Hildebrand, E. A., Janzen, A., & Prendergast, M. E. (2019). Climate, ecology, and the spread of herding in eastern Africa. Quaternary Science Reviews, 204, 119-132.
L. Turkana	Equid Site			8000 - 10000 BP	Equus sp.	-1.95	1.11	Grazer		Chritz, K. L., Cerling, T. E., Freeman, K. H., Hildebrand, E. A., Janzen, A., & Prendergast, M. E. (2019). Climate, ecology, and the spread of herding in eastern Africa. Quaternary Science Reviews, 204, 119-132.
L. Turkana	Equid Site			8000 - 10000 BP	Equus sp.	-1.87	-2.52	Grazer		Chritz, K. L., Cerling, T. E., Freeman, K. H., Hildebrand, E. A., Janzen, A., & Prendergast, M. E. (2019). Climate, ecology, and the spread of herding in eastern Africa. Quaternary Science Reviews, 204, 119-132.
L. Turkana	Equid Site			8000 - 10000 BP	Equus sp.	-1.08	1.68	Grazer		Chritz, K. L., Cerling, T. E., Freeman, K. H., Hildebrand, E. A., Janzen, A., & Prendergast, M. E. (2019). Climate, ecology, and the spread of herding in eastern Africa. Quaternary Science Reviews, 204, 119-132.
L. Turkana	Equid Site			8000 - 10000 BP	Equus sp.	-0.41	3.63	Grazer		Chritz, K. L., Cerling, T. E., Freeman, K. H., Hildebrand, E. A., Janzen, A., & Prendergast, M. E. (2019). Climate, ecology, and the spread of herding in eastern Africa. Quaternary Science Reviews, 204, 119-132.
L. Turkana	Equid Site			8000 - 10000 BP	Equus sp.	-0.4	3.62	Grazer		Chritz, K. L., Cerling, T. E., Freeman, K. H., Hildebrand, E. A., Janzen, A., & Prendergast, M. E. (2019). Climate, ecology, and the spread of herding in eastern Africa. Quaternary Science Reviews, 204, 119-132.
L. Turkana	Equid Site			8000 - 10000 BP	Equus sp.	-0.28	2.28	Grazer		Chritz, K. L., Cerling, T. E., Freeman, K. H., Hildebrand, E. A., Janzen, A., & Prendergast, M. E. (2019). Climate, ecology, and the spread of herding in eastern Africa. Quaternary Science Reviews, 204, 119-132.
L. Turkana	Equid Site			8000 - 10000 BP	Equus sp.	-0.15	3.49	Grazer		Chritz, K. L., Cerling, T. E., Freeman, K. H., Hildebrand, E. A., Janzen, A., & Prendergast, M. E. (2019). Climate, ecology, and the spread of herding in eastern Africa. Quaternary Science Reviews, 204, 119-132.
L. Turkana	Equid Site			8000 - 10000 BP	Equus sp.	-0.12	2.52	Grazer		Chritz, K. L., Cerling, T. E., Freeman, K. H., Hildebrand, E. A., Janzen, A., & Prendergast, M. E. (2019). Climate, ecology, and the spread of herding in eastern Africa. Quaternary Science Reviews, 204, 119-132.
L. Turkana	Equid Site			8000 - 10000 BP	Equus sp.	-0.11	2.54	Grazer		Chritz, K. L., Cerling, T. E., Freeman, K. H., Hildebrand, E. A., Janzen, A., & Prendergast, M. E. (2019). Climate, ecology, and the spread of herding in eastern Africa. Quaternary Science Reviews, 204, 119-132.
L. Turkana	Equid Site			8000 - 10000 BP	Equus sp.	0.04	2.36	Grazer		Chritz, K. L., Cerling, T. E., Freeman, K. H., Hildebrand, E. A., Janzen, A., & Prendergast, M. E. (2019). Climate, ecology, and the spread of herding in eastern Africa. Quaternary Science Reviews, 204, 119-132.
L. Turkana	Equid Site			8000 - 10000 BP	Equus sp.	0.1	4.05	Grazer		Chritz, K. L., Cerling, T. E., Freeman, K. H., Hildebrand, E. A., Janzen, A., & Prendergast, M. E. (2019). Climate, ecology, and the spread of herding in eastern Africa. Quaternary Science Reviews, 204, 119-132.
L. Turkana	Equid Site			8000 - 10000 BP	Equus sp.	0.11	2.37	Grazer		Chritz, K. L., Cerling, T. E., Freeman, K. H., Hildebrand, E. A., Janzen, A., & Prendergast, M. E. (2019). Climate, ecology, and the spread of herding in eastern Africa. Quaternary Science Reviews, 204, 119-132.
L. Turkana	Equid Site			8000 - 10000 BP	Equus sp.	0.41	3.28	Grazer		Chritz, K. L., Cerling, T. E., Freeman, K. H., Hildebrand, E. A., Janzen, A., & Prendergast, M. E. (2019). Climate, ecology, and the spread of herding in eastern Africa. Quaternary Science Reviews, 204, 119-132.
L. Turkana	Equid Site			8000 - 10000 BP	Equus sp.	0.55	1.15	Grazer		Chritz, K. L., Cerling, T. E., Freeman, K. H., Hildebrand, E. A., Janzen, A., & Prendergast, M. E. (2019). Climate, ecology, and the spread of herding in eastern Africa. Quaternary Science Reviews, 204, 119-132.
L. Turkana	Equid Site			8000 - 10000 BP	Equus sp.	0.56	3.42	Grazer		Chritz, K. L., Cerling, T. E., Freeman, K. H., Hildebrand, E. A., Janzen, A., & Prendergast, M. E. (2019). Climate, ecology, and the spread of herding in eastern Africa. Quaternary Science Reviews, 204, 119-132.
L. Turkana	Equid Site			8000 - 10000 BP	Equus sp.	0.64	5.77	Grazer		Chritz, K. L., Cerling, T. E., Freeman, K. H., Hildebrand, E. A., Janzen, A., & Prendergast, M. E. (2019). Climate, ecology, and the spread of herding in eastern Africa. Quaternary Science Reviews, 204, 119-132.
L. Turkana	Equid Site			8000 - 10000 BP	Equus sp.	1.07	0.84	Grazer		Chritz, K. L., Cerling, T. E., Freeman, K. H., Hildebrand, E. A., Janzen, A., & Prendergast, M. E. (2019). Climate, ecology, and the spread of herding in eastern Africa. Quaternary Science Reviews, 204, 119-132.
L. Turkana	Equid Site			8000 - 10000 BP	Phacochoerus sp.	0.33	3.05	Grazer		Chritz, K. L., Cerling, T. E., Freeman, K. H., Hildebrand, E. A., Janzen, A., & Prendergast, M. E. (2019). Climate, ecology, and the spread of herding in eastern Africa. Quaternary Science Reviews, 204, 119-132.
L. Turkana	Equid Site			8000 - 10000 BP	Reduncini	2	2.82	Grazer		Chritz, K. L., Cerling, T. E., Freeman, K. H., Hildebrand, E. A., Janzen, A., & Prendergast, M. E. (2019). Climate, ecology, and the spread of herding in eastern Africa. Quaternary Science Reviews, 204, 119-132.
L. Turkana	Equid Site			8000 - 10000 BP	Phacochoerus sp.	-0.03	3	Grazer		Chritz, K. L., Cerling, T. E., Freeman, K. H., Hildebrand, E. A., Janzen, A., & Prendergast, M. E. (2019). Climate, ecology, and the spread of herding in eastern Africa. Quaternary Science Reviews, 204, 119-132.
L. Turkana	Dongodien			3500 - 4300 BP	Alcelaphine	-1.64	3.35	Grazer		Chritz, K. L., Cerling, T. E., Freeman, K. H., Hildebrand, E. A., Janzen, A., & Prendergast, M. E. (2019). Climate, ecology, and the spread of herding in eastern Africa. Quaternary Science Reviews, 204, 119-132.
L. Turkana	Dongodien			3500 - 4300 BP	Alcelaphine	-1.28	4.54	Grazer		Chritz, K. L., Cerling, T. E., Freeman, K. H., Hildebrand, E. A., Janzen, A., & Prendergast, M. E. (2019). Climate, ecology, and the spread of herding in eastern Africa. Quaternary Science Reviews, 204, 119-132.
L. Turkana	Dongodien			3500 - 4300 BP	Alcelaphine	0.34	2.78	Grazer		Chritz, K. L., Cerling, T. E., Freeman, K. H., Hildebrand, E. A., Janzen, A., & Prendergast, M. E. (2019). Climate, ecology, and the spread of herding in eastern Africa. Quaternary Science Reviews, 204, 119-132.
L. Turkana	Dongodien			3500 - 4300 BP	Antilopini	-4.54	0.55	Mixed feeder		Chritz, K. L., Cerling, T. E., Freeman, K. H., Hildebrand, E. A., Janzen, A., & Prendergast, M. E. (2019). Climate, ecology, and the spread of herding in eastern Africa. Quaternary Science Reviews, 204, 119-132.
L. Turkana	Dongodien			3500 - 4300 BP	Antilopini	-2.95	4.07	Mixed feeder		Chritz, K. L., Cerling, T. E., Freeman, K. H., Hildebrand, E. A., Janzen, A., & Prendergast, M. E. (2019). Climate, ecology, and the spread of herding in eastern Africa. Quaternary Science Reviews, 204, 119-132.
L. Turkana	Dongodien			3500 - 4300 BP	Antilopini	-2.2	4.02	Mixed feeder		Chritz, K. L., Cerling, T. E., Freeman, K. H., Hildebrand, E. A., Janzen, A., & Prendergast, M. E. (2019). Climate, ecology, and the spread of herding in eastern Africa. Quaternary Science Reviews, 204, 119-132.
L. Turkana	Dongodien			3500 - 4300 BP	Bovid	1.62	3.55	Grazer		Chritz, K. L., Cerling, T. E., Freeman, K. H., Hildebrand, E. A., Janzen, A., & Prendergast, M. E. (2019). Climate, ecology, and the spread of herding in eastern Africa. Quaternary Science Reviews, 204, 119-132.
L. Turkana	Dongodien			3500 - 4300 BP	Caprini	-4.47	6	Mixed feeder		Chritz, K. L., Cerling, T. E., Freeman, K. H., Hildebrand, E. A., Janzen, A., & Prendergast, M. E. (2019). Climate, ecology, and the spread of herding in eastern Africa. Quaternary Science Reviews, 204, 119-132.
L. Turkana	Dongodien			3500 - 4300 BP	Mammal	-6.01	5.3	Mixed feeder		Chritz, K. L., Cerling, T. E., Freeman, K. H., Hildebrand, E. A., Janzen, A., & Prendergast, M. E. (2019). Climate, ecology, and the spread of herding in eastern Africa. Quaternary Science Reviews, 204, 119-132.
L. Turkana	Dongodien			3500 - 4300 BP	Mammal	-4.18	3.45	Mixed feeder		Chritz, K. L., Cerling, T. E., Freeman, K. H., Hildebrand, E. A., Janzen, A., & Prendergast, M. E. (2019). Climate, ecology, and the spread of herding in eastern Africa. Quaternary Science Reviews, 204, 119-132.
L. Turkana	Dongodien			3500 - 4300 BP	Mammal	-0.54	1.89	Grazer		Chritz, K. L., Cerling, T. E., Freeman, K. H., Hildebrand, E. A., Janzen, A., & Prendergast, M. E. (2019). Climate, ecology, and the spread of herding in eastern Africa. Quaternary Science Reviews, 204, 119-132.
L. Turkana	Dongodien			3500 - 4300 BP	Caprini	-1.39	1.81	Grazer		Chritz, K. L., Cerling, T. E., Freeman, K. H., Hildebrand, E. A., Janzen, A., & Prendergast, M. E. (2019). Climate, ecology, and the spread of herding in eastern Africa. Quaternary Science Reviews, 204, 119-132.
L. Turkana	Dongodien			3500 - 4300 BP	Caprini	-7.92	3.24	Mixed feeder		Chritz, K. L., Cerling, T. E., Freeman, K. H., Hildebrand, E. A., Janzen, A., & Prendergast, M. E. (2019). Climate, ecology, and the spread of herding in eastern Africa. Quaternary Science Reviews, 204, 119-132.
L. Turkana	Dongodien			3500 - 4300 BP	Caprini	-7.51	1.52	Mixed feeder		Chritz, K. L., Cerling, T. E., Freeman, K. H., Hildebrand, E. A., Janzen, A., & Prendergast, M. E. (2019). Climate, ecology, and the spread of herding in eastern Africa. Quaternary Science Reviews, 204, 119-132.
L. Turkana	Dongodien			3500 - 4300 BP	Caprini	-6.83	5.19	Mixed feeder		Chritz, K. L., Cerling, T. E., Freeman, K. H., Hildebrand, E. A., Janzen, A., & Prendergast, M. E. (2019). Climate, ecology, and the spread of herding in eastern Africa. Quaternary Science Reviews, 204, 119-132.
L. Turkana	Dongodien			3500 - 4300 BP	Caprini	-5.46	4.71	Mixed feeder		Chritz, K. L., Cerling, T. E., Freeman, K. H., Hildebrand, E. A., Janzen, A., & Prendergast, M. E. (2019). Climate, ecology, and the spread of herding in eastern Africa. Quaternary Science Reviews, 204, 119-132.
L. Turkana	Dongodien			3500 - 4300 BP	Caprini	-5.31	4.8	Mixed feeder		Chritz, K. L., Cerling, T. E., Freeman, K. H., Hildebrand, E. A., Janzen, A., & Prendergast, M. E. (2019). Climate, ecology, and the spread of herding in eastern Africa. Quaternary Science Reviews, 204, 119-132.
L. Turkana	Dongodien			3500 - 4300 BP	Caprini	-4.75	5.06	Mixed feeder		Chritz, K. L., Cerling, T. E., Freeman, K. H., Hildebrand, E. A., Janzen, A., & Prendergast, M. E. (2019). Climate, ecology, and the spread of herding in eastern Africa. Quaternary Science Reviews, 204, 119-132.
L. Turkana	Dongodien			3500 - 4300 BP	Caprini	-4.47	6	Mixed feeder		Chritz, K. L., Cerling, T. E., Freeman, K. H., Hildebrand, E. A., Janzen, A., & Prendergast, M. E. (2019). Climate, ecology, and the spread of herding in eastern Africa. Quaternary Science Reviews, 204, 119-132.
L. Turkana	Dongodien			3500 - 4300 BP	Caprini	-3.73	2.08	Mixed feeder		Chritz, K. L., Cerling, T. E., Freeman, K. H., Hildebrand, E. A., Janzen, A., & Prendergast, M. E. (2019). Climate, ecology, and the spread of herding in eastern Africa. Quaternary Science Reviews, 204, 119-132.
L. Turkana	Dongodien			3500 - 4300 BP	Caprini	-3.36	4.91	Mixed feeder		Chritz, K. L., Cerling, T. E., Freeman, K. H., Hildebrand, E. A., Janzen, A., & Prendergast, M. E. (2019). Climate, ecology, and the spread of herding in eastern Africa. Quaternary Science Reviews, 204, 119-132.
L. Turkana	Dongodien			3500 - 4300 BP	Caprini	-3.08	4.43	Mixed feeder		Chritz, K. L., Cerling, T. E., Freeman, K. H., Hildebrand, E. A., Janzen, A., & Prendergast, M. E. (2019). Climate, ecology, and the spread of herding in eastern Africa. Quaternary Science Reviews, 204, 119-132.
L. Turkana	Dongodien			3500 - 4300 BP	Caprini	-2.93	6.71	Mixed feeder		Chritz, K. L., Cerling, T. E., Freeman, K. H., Hildebrand, E. A., Janzen, A., & Prendergast, M. E. (2019). Climate, ecology, and the spread of herding in eastern Africa. Quaternary Science Reviews, 204, 119-132.
L. Turkana	Dongodien			3500 - 4300 BP	Caprini	-2.26	4.64	Grazer		Chritz, K. L., Cerling, T. E., Freeman, K. H., Hildebrand, E. A., Janzen, A., & Prendergast, M. E. (2019). Climate, ecology, and the spread of herding in eastern Africa. Quaternary Science Reviews, 204, 119-132.
L. Turkana	Dongodien			3500 - 4300 BP	Caprini	-2.08	5.05	Grazer		Chritz, K. L., Cerling, T. E., Freeman, K. H., Hildebrand, E. A., Janzen, A., & Prendergast, M. E. (2019). Climate, ecology, and the spread of herding in eastern Africa. Quaternary Science Reviews, 204, 119-132.
L. Turkana	Dongodien			3500 - 4300 BP	Caprini	-1.61	4.6	Grazer		Chritz, K. L., Cerling, T. E., Freeman, K. H., Hildebrand, E. A., Janzen, A., & Prendergast, M. E. (2019). Climate, ecology, and the spread of herding in eastern Africa. Quaternary Science Reviews, 204, 119-132.
L. Turkana	Dongodien			3500 - 4300 BP	Caprini	-1.51	5.78	Grazer		Chritz, K. L., Cerling, T. E., Freeman, K. H., Hildebrand, E. A., Janzen, A., & Prendergast, M. E. (2019). Climate, ecology, and the spread of herding in eastern Africa. Quaternary Science Reviews, 204, 119-132.
L. Turkana	Dongodien			3500 - 4300 BP	Caprini	-0.02	4.1	Grazer		Chritz, K. L., Cerling, T. E., Freeman, K. H., Hildebrand, E. A., Janzen, A., & Prendergast, M. E. (2019). Climate, ecology, and the spread of herding in eastern Africa. Quaternary Science Reviews, 204, 119-132.
L. Turkana	Dongodien			3500 - 4300 BP	Caprini	0.06	3.57	Grazer		Chritz, K. L., Cerling, T. E., Freeman, K. H., Hildebrand, E. A., Janzen, A., & Prendergast, M. E. (2019). Climate, ecology, and the spread of herding in eastern Africa. Quaternary Science Reviews, 204, 119-132.
L. Turkana	Dongodien			3500 - 4300 BP	Equus sp.	-0.24	0.63	Grazer		Chritz, K. L., Cerling, T. E., Freeman, K. H., Hildebrand, E. A., Janzen, A., & Prendergast, M. E. (2019). Climate, ecology, and the spread of herding in eastern Africa. Quaternary Science Reviews, 204, 119-132.
L. Turkana	Dongodien			3500 - 4300 BP	Hippopotamus amphibius	0.03	0.39	Grazer		Chritz, K. L., Cerling, T. E., Freeman, K. H., Hildebrand, E. A., Janzen, A., & Prendergast, M. E. (2019). Climate, ecology, and the spread of herding in eastern Africa. Quaternary Science Reviews, 204, 119-132.
L. Turkana	Dongodien			3500 - 4300 BP	Caprini	-5.92	4.42	Mixed feeder		Chritz, K. L., Cerling, T. E., Freeman, K. H., Hildebrand, E. A., Janzen, A., & Prendergast, M. E. (2019). Climate, ecology, and the spread of herding in eastern Africa. Quaternary Science Reviews, 204, 119-132.
L. Turkana	Dongodien			3500 - 4300 BP	Caprini	-5.42	2.44	Mixed feeder		Chritz, K. L., Cerling, T. E., Freeman, K. H., Hildebrand, E. A., Janzen, A., & Prendergast, M. E. (2019). Climate, ecology, and the spread of herding in eastern Africa. Quaternary Science Reviews, 204, 119-132.
L. Turkana	Dongodien			3500 - 4300 BP	Eudorcas thomsonii	-3.28	3.78	Mixed feeder		Chritz, K. L., Cerling, T. E., Freeman, K. H., Hildebrand, E. A., Janzen, A., & Prendergast, M. E. (2019). Climate, ecology, and the spread of herding in eastern Africa. Quaternary Science Reviews, 204, 119-132.
EBA	EBA			1200 - 1500 BP	Antilopini	-8.74	1.82	Mixed feeder		Chritz, K. L., Cerling, T. E., Freeman, K. H., Hildebrand, E. A., Janzen, A., & Prendergast, M. E. (2019). Climate, ecology, and the spread of herding in eastern Africa. Quaternary Science Reviews, 204, 119-132.
EBA	EBA			1200 - 1500 BP	Antilopini	-5.46	3.51	Mixed feeder		Chritz, K. L., Cerling, T. E., Freeman, K. H., Hildebrand, E. A., Janzen, A., & Prendergast, M. E. (2019). Climate, ecology, and the spread of herding in eastern Africa. Quaternary Science Reviews, 204, 119-132.
EBA	EBA			1200 - 1500 BP	Antilopini	-1.22	1.04	Grazer		Chritz, K. L., Cerling, T. E., Freeman, K. H., Hildebrand, E. A., Janzen, A., & Prendergast, M. E. (2019). Climate, ecology, and the spread of herding in eastern Africa. Quaternary Science Reviews, 204, 119-132.
EBA	EBA			1200 - 1500 BP	Nanger granti	-3.77	-4.29	Mixed Feeder		Chritz, K. L., Cerling, T. E., Freeman, K. H., Hildebrand, E. A., Janzen, A., & Prendergast, M. E. (2019). Climate, ecology, and the spread of herding in eastern Africa. Quaternary Science Reviews, 204, 119-132.
EBA	EBA			1200 - 1500 BP	Nanger granti	-2.47	-0.33	Mixed Feeder		Chritz, K. L., Cerling, T. E., Freeman, K. H., Hildebrand, E. A., Janzen, A., & Prendergast, M. E. (2019). Climate, ecology, and the spread of herding in eastern Africa. Quaternary Science Reviews, 204, 119-132.
EBA	EBA			1200 - 1500 BP	Nanger granti	-1.51	3.26	Mixed Feeder		Chritz, K. L., Cerling, T. E., Freeman, K. H., Hildebrand, E. A., Janzen, A., & Prendergast, M. E. (2019). Climate, ecology, and the spread of herding in eastern Africa. Quaternary Science Reviews, 204, 119-132.
EBA	EBA			1200 - 1500 BP	Nanger granti	3.28	2.74	Mixed Feeder		Chritz, K. L., Cerling, T. E., Freeman, K. H., Hildebrand, E. A., Janzen, A., & Prendergast, M. E. (2019). Climate, ecology, and the spread of herding in eastern Africa. Quaternary Science Reviews, 204, 119-132.
EBA	EBA			1200 - 1500 BP	Madoqua sp.	-12.55	0.14	Browser		Chritz, K. L., Cerling, T. E., Freeman, K. H., Hildebrand, E. A., Janzen, A., & Prendergast, M. E. (2019). Climate, ecology, and the spread of herding in eastern Africa. Quaternary Science Reviews, 204, 119-132.
EBA	EBA			1200 - 1500 BP	Madoqua sp.	-11.49	3.55	Browser		Chritz, K. L., Cerling, T. E., Freeman, K. H., Hildebrand, E. A., Janzen, A., & Prendergast, M. E. (2019). Climate, ecology, and the spread of herding in eastern Africa. Quaternary Science Reviews, 204, 119-132.
EBA	EBA			1200 - 1500 BP	Madoqua sp.	-7.91	1.35	Browser		Chritz, K. L., Cerling, T. E., Freeman, K. H., Hildebrand, E. A., Janzen, A., & Prendergast, M. E. (2019). Climate, ecology, and the spread of herding in eastern Africa. Quaternary Science Reviews, 204, 119-132.
EBA	EBA			1200 - 1500 BP	Oryx beisa	1.31	-0.1	Grazer		Chritz, K. L., Cerling, T. E., Freeman, K. H., Hildebrand, E. A., Janzen, A., & Prendergast, M. E. (2019). Climate, ecology, and the spread of herding in eastern Africa. Quaternary Science Reviews, 204, 119-132.
EBA	EBA			4400 - 4800 BP	Equus sp.	0.07	1.27	Grazer		Chritz, K. L., Cerling, T. E., Freeman, K. H., Hildebrand, E. A., Janzen, A., & Prendergast, M. E. (2019). Climate, ecology, and the spread of herding in eastern Africa. Quaternary Science Reviews, 204, 119-132.
EBA	EBA			4400 - 4800 BP	Equus sp.	0.91	1.14	Grazer		Chritz, K. L., Cerling, T. E., Freeman, K. H., Hildebrand, E. A., Janzen, A., & Prendergast, M. E. (2019). Climate, ecology, and the spread of herding in eastern Africa. Quaternary Science Reviews, 204, 119-132.
EBA	EBA			4400 - 4800 BP	Antilopini	-9.27	5.52	Mixed feeder		Chritz, K. L., Cerling, T. E., Freeman, K. H., Hildebrand, E. A., Janzen, A., & Prendergast, M. E. (2019). Climate, ecology, and the spread of herding in eastern Africa. Quaternary Science Reviews, 204, 119-132.
EBA	EBA			4400 - 4800 BP	Antilopini	-9.06	0.7	Mixed feeder		Chritz, K. L., Cerling, T. E., Freeman, K. H., Hildebrand, E. A., Janzen, A., & Prendergast, M. E. (2019). Climate, ecology, and the spread of herding in eastern Africa. Quaternary Science Reviews, 204, 119-132.
EBA	EBA			4400 - 4800 BP	Antilopini	-7.55	1.49	Mixed feeder		Chritz, K. L., Cerling, T. E., Freeman, K. H., Hildebrand, E. A., Janzen, A., & Prendergast, M. E. (2019). Climate, ecology, and the spread of herding in eastern Africa. Quaternary Science Reviews, 204, 119-132.
EBA	EBA			4400 - 4800 BP	Antilopini	-7.26	4.98	Mixed feeder		Chritz, K. L., Cerling, T. E., Freeman, K. H., Hildebrand, E. A., Janzen, A., & Prendergast, M. E. (2019). Climate, ecology, and the spread of herding in eastern Africa. Quaternary Science Reviews, 204, 119-132.
EBA	EBA			4400 - 4800 BP	Antilopini	-6.52	2.46	Mixed feeder		Chritz, K. L., Cerling, T. E., Freeman, K. H., Hildebrand, E. A., Janzen, A., & Prendergast, M. E. (2019). Climate, ecology, and the spread of herding in eastern Africa. Quaternary Science Reviews, 204, 119-132.
EBA	EBA			4400 - 4800 BP	Antilopini	-5.77	-2.77	Mixed feeder		Chritz, K. L., Cerling, T. E., Freeman, K. H., Hildebrand, E. A., Janzen, A., & Prendergast, M. E. (2019). Climate, ecology, and the spread of herding in eastern Africa. Quaternary Science Reviews, 204, 119-132.
EBA	EBA			4400 - 4800 BP	Antilopini	-3.65	1.78	Mixed feeder		Chritz, K. L., Cerling, T. E., Freeman, K. H., Hildebrand, E. A., Janzen, A., & Prendergast, M. E. (2019). Climate, ecology, and the spread of herding in eastern Africa. Quaternary Science Reviews, 204, 119-132.
EBA	EBA			4400 - 4800 BP	Antilopini	-1.71	2.81	Grazer		Chritz, K. L., Cerling, T. E., Freeman, K. H., Hildebrand, E. A., Janzen, A., & Prendergast, M. E. (2019). Climate, ecology, and the spread of herding in eastern Africa. Quaternary Science Reviews, 204, 119-132.
EBA	EBA			4400 - 4800 BP	Antilopini	-1.4	4.18	Grazer		Chritz, K. L., Cerling, T. E., Freeman, K. H., Hildebrand, E. A., Janzen, A., & Prendergast, M. E. (2019). Climate, ecology, and the spread of herding in eastern Africa. Quaternary Science Reviews, 204, 119-132.
EBA	EBA			4400 - 4800 BP	Antilopini	-0.77	5.33	Grazer		Chritz, K. L., Cerling, T. E., Freeman, K. H., Hildebrand, E. A., Janzen, A., & Prendergast, M. E. (2019). Climate, ecology, and the spread of herding in eastern Africa. Quaternary Science Reviews, 204, 119-132.
EBA	EBA			4400 - 4800 BP	Antilopini	-0.77	3.56	Grazer		Chritz, K. L., Cerling, T. E., Freeman, K. H., Hildebrand, E. A., Janzen, A., & Prendergast, M. E. (2019). Climate, ecology, and the spread of herding in eastern Africa. Quaternary Science Reviews, 204, 119-132.
EBA	EBA			4400 - 4800 BP	Antilopini	-0.22	2.3	Grazer		Chritz, K. L., Cerling, T. E., Freeman, K. H., Hildebrand, E. A., Janzen, A., & Prendergast, M. E. (2019). Climate, ecology, and the spread of herding in eastern Africa. Quaternary Science Reviews, 204, 119-132.
EBA	EBA			4400 - 4800 BP	Antilopini	0.16	1.61	Grazer		Chritz, K. L., Cerling, T. E., Freeman, K. H., Hildebrand, E. A., Janzen, A., & Prendergast, M. E. (2019). Climate, ecology, and the spread of herding in eastern Africa. Quaternary Science Reviews, 204, 119-132.
EBA	EBA			4400 - 4800 BP	Giraffa camelopardalis	-12.42	5.35	Browser		Chritz, K. L., Cerling, T. E., Freeman, K. H., Hildebrand, E. A., Janzen, A., & Prendergast, M. E. (2019). Climate, ecology, and the spread of herding in eastern Africa. Quaternary Science Reviews, 204, 119-132.
EBA	EBA			4400 - 4800 BP	Madoqua sp.	-11.82	1.59	Browser		Chritz, K. L., Cerling, T. E., Freeman, K. H., Hildebrand, E. A., Janzen, A., & Prendergast, M. E. (2019). Climate, ecology, and the spread of herding in eastern Africa. Quaternary Science Reviews, 204, 119-132.
EBA	EBA			4400 - 4800 BP	Oryx beisa	-4.69	2.81	Grazer		Chritz, K. L., Cerling, T. E., Freeman, K. H., Hildebrand, E. A., Janzen, A., & Prendergast, M. E. (2019). Climate, ecology, and the spread of herding in eastern Africa. Quaternary Science Reviews, 204, 119-132.
EBA	EBA			4400 - 4800 BP	Oryx beisa	-0.66	3.17	Grazer		Chritz, K. L., Cerling, T. E., Freeman, K. H., Hildebrand, E. A., Janzen, A., & Prendergast, M. E. (2019). Climate, ecology, and the spread of herding in eastern Africa. Quaternary Science Reviews, 204, 119-132.
EBA	EBA			4400 - 4800 BP	Oryx beisa	2.08	1.57	Grazer		Chritz, K. L., Cerling, T. E., Freeman, K. H., Hildebrand, E. A., Janzen, A., & Prendergast, M. E. (2019). Climate, ecology, and the spread of herding in eastern Africa. Quaternary Science Reviews, 204, 119-132.
EBA	EBA			4400 - 4800 BP	Oryx beisa	2.17	2.22	Grazer		Chritz, K. L., Cerling, T. E., Freeman, K. H., Hildebrand, E. A., Janzen, A., & Prendergast, M. E. (2019). Climate, ecology, and the spread of herding in eastern Africa. Quaternary Science Reviews, 204, 119-132.
EBA	EBA			4400 - 4800 BP	Oryx beisa	2.63	0.17	Grazer		Chritz, K. L., Cerling, T. E., Freeman, K. H., Hildebrand, E. A., Janzen, A., & Prendergast, M. E. (2019). Climate, ecology, and the spread of herding in eastern Africa. Quaternary Science Reviews, 204, 119-132.
EBA	EBA			4400 - 4800 BP	Oryx beisa	2.72	0.57	Grazer		Chritz, K. L., Cerling, T. E., Freeman, K. H., Hildebrand, E. A., Janzen, A., & Prendergast, M. E. (2019). Climate, ecology, and the spread of herding in eastern Africa. Quaternary Science Reviews, 204, 119-132.
EBA	EBA			4400 - 4800 BP	Oryx beisa	3.41	-0.84	Grazer		Chritz, K. L., Cerling, T. E., Freeman, K. H., Hildebrand, E. A., Janzen, A., & Prendergast, M. E. (2019). Climate, ecology, and the spread of herding in eastern Africa. Quaternary Science Reviews, 204, 119-132.
EBA	EBA			4400 - 4800 BP	Oryx beisa	3.98	2.86	Grazer		Chritz, K. L., Cerling, T. E., Freeman, K. H., Hildebrand, E. A., Janzen, A., & Prendergast, M. E. (2019). Climate, ecology, and the spread of herding in eastern Africa. Quaternary Science Reviews, 204, 119-132.
EBA	EBA			4400 - 4800 BP	Phacochoerus sp.	-11.11	0.69	Grazer		Chritz, K. L., Cerling, T. E., Freeman, K. H., Hildebrand, E. A., Janzen, A., & Prendergast, M. E. (2019). Climate, ecology, and the spread of herding in eastern Africa. Quaternary Science Reviews, 204, 119-132.
EBA	EBA			4400 - 4800 BP	Sylvicapra grimmia	-2.05	1.81	Browser		Chritz, K. L., Cerling, T. E., Freeman, K. H., Hildebrand, E. A., Janzen, A., & Prendergast, M. E. (2019). Climate, ecology, and the spread of herding in eastern Africa. Quaternary Science Reviews, 204, 119-132.
EBA	EBA			4400 - 4800 BP	Taurotragus oryx	-12.16	7.01	Browser		Chritz, K. L., Cerling, T. E., Freeman, K. H., Hildebrand, E. A., Janzen, A., & Prendergast, M. E. (2019). Climate, ecology, and the spread of herding in eastern Africa. Quaternary Science Reviews, 204, 119-132.
EBA	EBA			4400 - 4800 BP	Taurotragus oryx	-11.49	3.23	Browser		Chritz, K. L., Cerling, T. E., Freeman, K. H., Hildebrand, E. A., Janzen, A., & Prendergast, M. E. (2019). Climate, ecology, and the spread of herding in eastern Africa. Quaternary Science Reviews, 204, 119-132.
EBA	EBA			4400 - 4800 BP	Taurotragus oryx	-10.14	6.32	Browser		Chritz, K. L., Cerling, T. E., Freeman, K. H., Hildebrand, E. A., Janzen, A., & Prendergast, M. E. (2019). Climate, ecology, and the spread of herding in eastern Africa. Quaternary Science Reviews, 204, 119-132.
EBA	EBA			4400 - 4800 BP	Taurotragus oryx	-9.02	5.08	Browser		Chritz, K. L., Cerling, T. E., Freeman, K. H., Hildebrand, E. A., Janzen, A., & Prendergast, M. E. (2019). Climate, ecology, and the spread of herding in eastern Africa. Quaternary Science Reviews, 204, 119-132.
EBA	EBA			7300 - 7700 BP	Antilopini	-7.83	1.43	Mixed feeder		Chritz, K. L., Cerling, T. E., Freeman, K. H., Hildebrand, E. A., Janzen, A., & Prendergast, M. E. (2019). Climate, ecology, and the spread of herding in eastern Africa. Quaternary Science Reviews, 204, 119-132.
EBA	EBA			7300 - 7700 BP	Antilopini	-3.81	2.68	Mixed feeder		Chritz, K. L., Cerling, T. E., Freeman, K. H., Hildebrand, E. A., Janzen, A., & Prendergast, M. E. (2019). Climate, ecology, and the spread of herding in eastern Africa. Quaternary Science Reviews, 204, 119-132.
EBA	EBA			7300 - 7700 BP	Antilopini	-3.3	3.71	Mixed feeder		Chritz, K. L., Cerling, T. E., Freeman, K. H., Hildebrand, E. A., Janzen, A., & Prendergast, M. E. (2019). Climate, ecology, and the spread of herding in eastern Africa. Quaternary Science Reviews, 204, 119-132.
EBA	EBA			7300 - 7700 BP	Oryx beisa	2.41	4.14	Grazer		Chritz, K. L., Cerling, T. E., Freeman, K. H., Hildebrand, E. A., Janzen, A., & Prendergast, M. E. (2019). Climate, ecology, and the spread of herding in eastern Africa. Quaternary Science Reviews, 204, 119-132.
EBA	EBA			7300 - 7700 BP	Taurotragus oryx	-8.86	5.63	Browser		Chritz, K. L., Cerling, T. E., Freeman, K. H., Hildebrand, E. A., Janzen, A., & Prendergast, M. E. (2019). Climate, ecology, and the spread of herding in eastern Africa. Quaternary Science Reviews, 204, 119-132.
EBA	EBA			7300 - 7700 BP	Taurotragus oryx	-3.67	1.45	Browser		Chritz, K. L., Cerling, T. E., Freeman, K. H., Hildebrand, E. A., Janzen, A., & Prendergast, M. E. (2019). Climate, ecology, and the spread of herding in eastern Africa. Quaternary Science Reviews, 204, 119-132.
EBA	EBA			7300 - 7700 BP	Taurotragus oryx	1.53	1.12	Browser		Chritz, K. L., Cerling, T. E., Freeman, K. H., Hildebrand, E. A., Janzen, A., & Prendergast, M. E. (2019). Climate, ecology, and the spread of herding in eastern Africa. Quaternary Science Reviews, 204, 119-132.
L. Turkana	FxJj12			8700 - 9100 BP	Alcelaphine	2	3.21	Grazer		Chritz, K. L., Cerling, T. E., Freeman, K. H., Hildebrand, E. A., Janzen, A., & Prendergast, M. E. (2019). Climate, ecology, and the spread of herding in eastern Africa. Quaternary Science Reviews, 204, 119-132.
L. Turkana	FxJj12			8700 - 9100 BP	Alcelaphine	1.37	-1.77	Grazer		Chritz, K. L., Cerling, T. E., Freeman, K. H., Hildebrand, E. A., Janzen, A., & Prendergast, M. E. (2019). Climate, ecology, and the spread of herding in eastern Africa. Quaternary Science Reviews, 204, 119-132.
L. Turkana	GaJj11			9000 - 10100 BP	Mammal	2.73	2.5	Grazer		Chritz, K. L., Cerling, T. E., Freeman, K. H., Hildebrand, E. A., Janzen, A., & Prendergast, M. E. (2019). Climate, ecology, and the spread of herding in eastern Africa. Quaternary Science Reviews, 204, 119-132.
L. Turkana	GaJj11			9000 - 10100 BP	Hippopotamus amphibius	-2.1	-1.96	Grazer		Chritz, K. L., Cerling, T. E., Freeman, K. H., Hildebrand, E. A., Janzen, A., & Prendergast, M. E. (2019). Climate, ecology, and the spread of herding in eastern Africa. Quaternary Science Reviews, 204, 119-132.
L. Turkana	GaJj11			9000 - 10100 BP	Hippopotamus amphibius	0.07	-2.29	Grazer		Chritz, K. L., Cerling, T. E., Freeman, K. H., Hildebrand, E. A., Janzen, A., & Prendergast, M. E. (2019). Climate, ecology, and the spread of herding in eastern Africa. Quaternary Science Reviews, 204, 119-132.
L. Turkana	GaJj2			4400 - 4800 BP	Aepyceros melampus	-7.16	2.3	Mixed feeder		Chritz, K. L., Cerling, T. E., Freeman, K. H., Hildebrand, E. A., Janzen, A., & Prendergast, M. E. (2019). Climate, ecology, and the spread of herding in eastern Africa. Quaternary Science Reviews, 204, 119-132.
L. Turkana	GaJj2			4400 - 4800 BP	Alcelaphine	-5.38	3.86	Grazer		Chritz, K. L., Cerling, T. E., Freeman, K. H., Hildebrand, E. A., Janzen, A., & Prendergast, M. E. (2019). Climate, ecology, and the spread of herding in eastern Africa. Quaternary Science Reviews, 204, 119-132.
L. Turkana	GaJj2			4400 - 4800 BP	Alcelaphine	-1.37	2.37	Grazer		Chritz, K. L., Cerling, T. E., Freeman, K. H., Hildebrand, E. A., Janzen, A., & Prendergast, M. E. (2019). Climate, ecology, and the spread of herding in eastern Africa. Quaternary Science Reviews, 204, 119-132.
L. Turkana	GaJj2			4400 - 4800 BP	Alcelaphine	-1.23	1.22	Grazer		Chritz, K. L., Cerling, T. E., Freeman, K. H., Hildebrand, E. A., Janzen, A., & Prendergast, M. E. (2019). Climate, ecology, and the spread of herding in eastern Africa. Quaternary Science Reviews, 204, 119-132.
L. Turkana	GaJj2			4400 - 4800 BP	Alcelaphine	-1.15	2.54	Grazer		Chritz, K. L., Cerling, T. E., Freeman, K. H., Hildebrand, E. A., Janzen, A., & Prendergast, M. E. (2019). Climate, ecology, and the spread of herding in eastern Africa. Quaternary Science Reviews, 204, 119-132.
L. Turkana	GaJj2			4400 - 4800 BP	Alcelaphine	3.2	0.47	Grazer		Chritz, K. L., Cerling, T. E., Freeman, K. H., Hildebrand, E. A., Janzen, A., & Prendergast, M. E. (2019). Climate, ecology, and the spread of herding in eastern Africa. Quaternary Science Reviews, 204, 119-132.
L. Turkana	GaJj2			4400 - 4800 BP	Mammal	-4.39	2.23	Grazer		Chritz, K. L., Cerling, T. E., Freeman, K. H., Hildebrand, E. A., Janzen, A., & Prendergast, M. E. (2019). Climate, ecology, and the spread of herding in eastern Africa. Quaternary Science Reviews, 204, 119-132.
L. Turkana	GaJj2			4400 - 4800 BP	Mammal	-1.9	1.38	Grazer		Chritz, K. L., Cerling, T. E., Freeman, K. H., Hildebrand, E. A., Janzen, A., & Prendergast, M. E. (2019). Climate, ecology, and the spread of herding in eastern Africa. Quaternary Science Reviews, 204, 119-132.
L. Turkana	GaJj2			4400 - 4800 BP	Mammal	1.85	3.79	Grazer		Chritz, K. L., Cerling, T. E., Freeman, K. H., Hildebrand, E. A., Janzen, A., & Prendergast, M. E. (2019). Climate, ecology, and the spread of herding in eastern Africa. Quaternary Science Reviews, 204, 119-132.
L. Turkana	GaJj2			4400 - 4800 BP	Caprini	-5.99	1.72	Mixed feeder		Chritz, K. L., Cerling, T. E., Freeman, K. H., Hildebrand, E. A., Janzen, A., & Prendergast, M. E. (2019). Climate, ecology, and the spread of herding in eastern Africa. Quaternary Science Reviews, 204, 119-132.
L. Turkana	GaJj2			4400 - 4800 BP	Mammal	1.28	4.07	Grazer		Chritz, K. L., Cerling, T. E., Freeman, K. H., Hildebrand, E. A., Janzen, A., & Prendergast, M. E. (2019). Climate, ecology, and the spread of herding in eastern Africa. Quaternary Science Reviews, 204, 119-132.
L. Turkana	GaJj2			4400 - 4800 BP	Madoqua sp.	-6.49	2.55	Browser		Chritz, K. L., Cerling, T. E., Freeman, K. H., Hildebrand, E. A., Janzen, A., & Prendergast, M. E. (2019). Climate, ecology, and the spread of herding in eastern Africa. Quaternary Science Reviews, 204, 119-132.
L. Turkana	GaJj2			4400 - 4800 BP	Hippopotamus amphibius	-4.08	-0.64	Grazer		Chritz, K. L., Cerling, T. E., Freeman, K. H., Hildebrand, E. A., Janzen, A., & Prendergast, M. E. (2019). Climate, ecology, and the spread of herding in eastern Africa. Quaternary Science Reviews, 204, 119-132.
L. Turkana	GaJj2			4400 - 4800 BP	Hippopotamus amphibius	-1.24	0.49	Grazer		Chritz, K. L., Cerling, T. E., Freeman, K. H., Hildebrand, E. A., Janzen, A., & Prendergast, M. E. (2019). Climate, ecology, and the spread of herding in eastern Africa. Quaternary Science Reviews, 204, 119-132.
L. Turkana	GaJj2			4400 - 4800 BP	Hippopotamus amphibius	-0.9	-1.4	Grazer		Chritz, K. L., Cerling, T. E., Freeman, K. H., Hildebrand, E. A., Janzen, A., & Prendergast, M. E. (2019). Climate, ecology, and the spread of herding in eastern Africa. Quaternary Science Reviews, 204, 119-132.
L. Turkana	GaJj2			4400 - 4800 BP	Neotragini	-1.85	-0.29	Grazer		Chritz, K. L., Cerling, T. E., Freeman, K. H., Hildebrand, E. A., Janzen, A., & Prendergast, M. E. (2019). Climate, ecology, and the spread of herding in eastern Africa. Quaternary Science Reviews, 204, 119-132.
L. Turkana	GaJj2			4400 - 4800 BP	Neotragini	1.66	1.99	Grazer		Chritz, K. L., Cerling, T. E., Freeman, K. H., Hildebrand, E. A., Janzen, A., & Prendergast, M. E. (2019). Climate, ecology, and the spread of herding in eastern Africa. Quaternary Science Reviews, 204, 119-132.
L. Turkana	GaJj2			4400 - 4800 BP	Phacochoerus sp.	-2.39	-1.42	Grazer		Chritz, K. L., Cerling, T. E., Freeman, K. H., Hildebrand, E. A., Janzen, A., & Prendergast, M. E. (2019). Climate, ecology, and the spread of herding in eastern Africa. Quaternary Science Reviews, 204, 119-132.
L. Turkana	GaJj2			4400 - 4800 BP	Phacochoerus sp.	-1.15	0.55	Grazer		Chritz, K. L., Cerling, T. E., Freeman, K. H., Hildebrand, E. A., Janzen, A., & Prendergast, M. E. (2019). Climate, ecology, and the spread of herding in eastern Africa. Quaternary Science Reviews, 204, 119-132.
L. Turkana	GaJj2			4400 - 4800 BP	Phacochoerus sp.	-0.18	1.74	Grazer		Chritz, K. L., Cerling, T. E., Freeman, K. H., Hildebrand, E. A., Janzen, A., & Prendergast, M. E. (2019). Climate, ecology, and the spread of herding in eastern Africa. Quaternary Science Reviews, 204, 119-132.
L. Turkana	GaJj2			4400 - 4800 BP	Phacochoerus sp.	1.97	1.23	Grazer		Chritz, K. L., Cerling, T. E., Freeman, K. H., Hildebrand, E. A., Janzen, A., & Prendergast, M. E. (2019). Climate, ecology, and the spread of herding in eastern Africa. Quaternary Science Reviews, 204, 119-132.
L. Victoria	Gogo Falls			1500 - 1900 BP	Damaliscus sp.	2.21	1.34	Grazer		Chritz, K. L., Cerling, T. E., Freeman, K. H., Hildebrand, E. A., Janzen, A., & Prendergast, M. E. (2019). Climate, ecology, and the spread of herding in eastern Africa. Quaternary Science Reviews, 204, 119-132.
L. Victoria	Gogo Falls			1500 - 1900 BP	Damaliscus sp.	0.56	-0.28	Grazer		Chritz, K. L., Cerling, T. E., Freeman, K. H., Hildebrand, E. A., Janzen, A., & Prendergast, M. E. (2019). Climate, ecology, and the spread of herding in eastern Africa. Quaternary Science Reviews, 204, 119-132.
L. Victoria	Gogo Falls			1500 - 1900 BP	Damaliscus sp.	0.58	0.07	Grazer		Chritz, K. L., Cerling, T. E., Freeman, K. H., Hildebrand, E. A., Janzen, A., & Prendergast, M. E. (2019). Climate, ecology, and the spread of herding in eastern Africa. Quaternary Science Reviews, 204, 119-132.
L. Victoria	Gogo Falls			1500 - 1900 BP	Damaliscus sp.	2.2	1.31	Grazer		Chritz, K. L., Cerling, T. E., Freeman, K. H., Hildebrand, E. A., Janzen, A., & Prendergast, M. E. (2019). Climate, ecology, and the spread of herding in eastern Africa. Quaternary Science Reviews, 204, 119-132.
L. Victoria	Gogo Falls			1500 - 1900 BP	Damaliscus sp.	2.75	1.48	Grazer		Chritz, K. L., Cerling, T. E., Freeman, K. H., Hildebrand, E. A., Janzen, A., & Prendergast, M. E. (2019). Climate, ecology, and the spread of herding in eastern Africa. Quaternary Science Reviews, 204, 119-132.
L. Victoria	Gogo Falls			1500 - 1900 BP	Alcelaphine	-0.38	-0.39	Grazer		Chritz, K. L., Cerling, T. E., Freeman, K. H., Hildebrand, E. A., Janzen, A., & Prendergast, M. E. (2019). Climate, ecology, and the spread of herding in eastern Africa. Quaternary Science Reviews, 204, 119-132.
L. Victoria	Gogo Falls			1500 - 1900 BP	Alcelaphine	-0.01	-0.27	Grazer		Chritz, K. L., Cerling, T. E., Freeman, K. H., Hildebrand, E. A., Janzen, A., & Prendergast, M. E. (2019). Climate, ecology, and the spread of herding in eastern Africa. Quaternary Science Reviews, 204, 119-132.
L. Victoria	Gogo Falls			1500 - 1900 BP	Alcelaphine	0.11	1.46	Grazer		Chritz, K. L., Cerling, T. E., Freeman, K. H., Hildebrand, E. A., Janzen, A., & Prendergast, M. E. (2019). Climate, ecology, and the spread of herding in eastern Africa. Quaternary Science Reviews, 204, 119-132.
L. Victoria	Gogo Falls			1500 - 1900 BP	Alcelaphine	0.22	1.45	Grazer		Chritz, K. L., Cerling, T. E., Freeman, K. H., Hildebrand, E. A., Janzen, A., & Prendergast, M. E. (2019). Climate, ecology, and the spread of herding in eastern Africa. Quaternary Science Reviews, 204, 119-132.
L. Victoria	Gogo Falls			1500 - 1900 BP	Alcelaphine	1.28	0.26	Grazer		Chritz, K. L., Cerling, T. E., Freeman, K. H., Hildebrand, E. A., Janzen, A., & Prendergast, M. E. (2019). Climate, ecology, and the spread of herding in eastern Africa. Quaternary Science Reviews, 204, 119-132.
L. Victoria	Gogo Falls			1500 - 1900 BP	Alcelaphine	1.79	0.68	Grazer		Chritz, K. L., Cerling, T. E., Freeman, K. H., Hildebrand, E. A., Janzen, A., & Prendergast, M. E. (2019). Climate, ecology, and the spread of herding in eastern Africa. Quaternary Science Reviews, 204, 119-132.
L. Victoria	Gogo Falls			1500 - 1900 BP	Alcelaphine	2.09	-2.12	Grazer		Chritz, K. L., Cerling, T. E., Freeman, K. H., Hildebrand, E. A., Janzen, A., & Prendergast, M. E. (2019). Climate, ecology, and the spread of herding in eastern Africa. Quaternary Science Reviews, 204, 119-132.
L. Victoria	Gogo Falls			1500 - 1900 BP	Alcelaphine	3.04	1.94	Grazer		Chritz, K. L., Cerling, T. E., Freeman, K. H., Hildebrand, E. A., Janzen, A., & Prendergast, M. E. (2019). Climate, ecology, and the spread of herding in eastern Africa. Quaternary Science Reviews, 204, 119-132.
L. Victoria	Gogo Falls			1500 - 1900 BP	Alcelaphine	3.17	2.44	Grazer		Chritz, K. L., Cerling, T. E., Freeman, K. H., Hildebrand, E. A., Janzen, A., & Prendergast, M. E. (2019). Climate, ecology, and the spread of herding in eastern Africa. Quaternary Science Reviews, 204, 119-132.
L. Victoria	Gogo Falls			1500 - 1900 BP	Alcelaphine	1.42	0.81	Grazer		Chritz, K. L., Cerling, T. E., Freeman, K. H., Hildebrand, E. A., Janzen, A., & Prendergast, M. E. (2019). Climate, ecology, and the spread of herding in eastern Africa. Quaternary Science Reviews, 204, 119-132.
L. Victoria	Gogo Falls			1500 - 1900 BP	Alcelaphine	3.04	1.93	Grazer		Chritz, K. L., Cerling, T. E., Freeman, K. H., Hildebrand, E. A., Janzen, A., & Prendergast, M. E. (2019). Climate, ecology, and the spread of herding in eastern Africa. Quaternary Science Reviews, 204, 119-132.
L. Victoria	Gogo Falls			1500 - 1900 BP	Bos taurus	-1	1.03	Grazer		Chritz, K. L., Cerling, T. E., Freeman, K. H., Hildebrand, E. A., Janzen, A., & Prendergast, M. E. (2019). Climate, ecology, and the spread of herding in eastern Africa. Quaternary Science Reviews, 204, 119-132.
L. Victoria	Gogo Falls			1500 - 1900 BP	Bos taurus	-0.76	-2.72	Grazer		Chritz, K. L., Cerling, T. E., Freeman, K. H., Hildebrand, E. A., Janzen, A., & Prendergast, M. E. (2019). Climate, ecology, and the spread of herding in eastern Africa. Quaternary Science Reviews, 204, 119-132.
L. Victoria	Gogo Falls			1500 - 1900 BP	Bos taurus	0.65	0.48	Grazer		Chritz, K. L., Cerling, T. E., Freeman, K. H., Hildebrand, E. A., Janzen, A., & Prendergast, M. E. (2019). Climate, ecology, and the spread of herding in eastern Africa. Quaternary Science Reviews, 204, 119-132.
L. Victoria	Gogo Falls			1500 - 1900 BP	Bos taurus	1.34	2.46	Grazer		Chritz, K. L., Cerling, T. E., Freeman, K. H., Hildebrand, E. A., Janzen, A., & Prendergast, M. E. (2019). Climate, ecology, and the spread of herding in eastern Africa. Quaternary Science Reviews, 204, 119-132.
L. Victoria	Gogo Falls			1500 - 1900 BP	Bos taurus	1.5	1.24	Grazer		Chritz, K. L., Cerling, T. E., Freeman, K. H., Hildebrand, E. A., Janzen, A., & Prendergast, M. E. (2019). Climate, ecology, and the spread of herding in eastern Africa. Quaternary Science Reviews, 204, 119-132.
L. Victoria	Gogo Falls			1500 - 1900 BP	Bos taurus	1.76	0.32	Grazer		Chritz, K. L., Cerling, T. E., Freeman, K. H., Hildebrand, E. A., Janzen, A., & Prendergast, M. E. (2019). Climate, ecology, and the spread of herding in eastern Africa. Quaternary Science Reviews, 204, 119-132.
L. Victoria	Gogo Falls			1500 - 1900 BP	Bos taurus	1.95	1.79	Grazer		Chritz, K. L., Cerling, T. E., Freeman, K. H., Hildebrand, E. A., Janzen, A., & Prendergast, M. E. (2019). Climate, ecology, and the spread of herding in eastern Africa. Quaternary Science Reviews, 204, 119-132.
L. Victoria	Gogo Falls			1500 - 1900 BP	Bos taurus	2.5	2.29	Grazer		Chritz, K. L., Cerling, T. E., Freeman, K. H., Hildebrand, E. A., Janzen, A., & Prendergast, M. E. (2019). Climate, ecology, and the spread of herding in eastern Africa. Quaternary Science Reviews, 204, 119-132.
L. Victoria	Gogo Falls			1500 - 1900 BP	Bos taurus	2.74	2.77	Grazer		Chritz, K. L., Cerling, T. E., Freeman, K. H., Hildebrand, E. A., Janzen, A., & Prendergast, M. E. (2019). Climate, ecology, and the spread of herding in eastern Africa. Quaternary Science Reviews, 204, 119-132.
L. Victoria	Gogo Falls			1500 - 1900 BP	Bos taurus	2.79	0.84	Grazer		Chritz, K. L., Cerling, T. E., Freeman, K. H., Hildebrand, E. A., Janzen, A., & Prendergast, M. E. (2019). Climate, ecology, and the spread of herding in eastern Africa. Quaternary Science Reviews, 204, 119-132.
L. Victoria	Gogo Falls			1500 - 1900 BP	Bos taurus	2.88	1.74	Grazer		Chritz, K. L., Cerling, T. E., Freeman, K. H., Hildebrand, E. A., Janzen, A., & Prendergast, M. E. (2019). Climate, ecology, and the spread of herding in eastern Africa. Quaternary Science Reviews, 204, 119-132.
L. Victoria	Gogo Falls			1500 - 1900 BP	Bos taurus	3.23	2.07	Grazer		Chritz, K. L., Cerling, T. E., Freeman, K. H., Hildebrand, E. A., Janzen, A., & Prendergast, M. E. (2019). Climate, ecology, and the spread of herding in eastern Africa. Quaternary Science Reviews, 204, 119-132.
L. Victoria	Gogo Falls			1500 - 1900 BP	Bos taurus	3.36	2.34	Grazer		Chritz, K. L., Cerling, T. E., Freeman, K. H., Hildebrand, E. A., Janzen, A., & Prendergast, M. E. (2019). Climate, ecology, and the spread of herding in eastern Africa. Quaternary Science Reviews, 204, 119-132.
L. Victoria	Gogo Falls			1500 - 1900 BP	Caprini	-2.14	-0.62	Grazer		Chritz, K. L., Cerling, T. E., Freeman, K. H., Hildebrand, E. A., Janzen, A., & Prendergast, M. E. (2019). Climate, ecology, and the spread of herding in eastern Africa. Quaternary Science Reviews, 204, 119-132.
L. Victoria	Gogo Falls			1500 - 1900 BP	Caprini	-1.97	1.61	Grazer		Chritz, K. L., Cerling, T. E., Freeman, K. H., Hildebrand, E. A., Janzen, A., & Prendergast, M. E. (2019). Climate, ecology, and the spread of herding in eastern Africa. Quaternary Science Reviews, 204, 119-132.
L. Victoria	Gogo Falls			1500 - 1900 BP	Caprini	-0.85	3.17	Grazer		Chritz, K. L., Cerling, T. E., Freeman, K. H., Hildebrand, E. A., Janzen, A., & Prendergast, M. E. (2019). Climate, ecology, and the spread of herding in eastern Africa. Quaternary Science Reviews, 204, 119-132.
L. Victoria	Gogo Falls			1500 - 1900 BP	Caprini	-0.68	-2.77	Grazer		Chritz, K. L., Cerling, T. E., Freeman, K. H., Hildebrand, E. A., Janzen, A., & Prendergast, M. E. (2019). Climate, ecology, and the spread of herding in eastern Africa. Quaternary Science Reviews, 204, 119-132.
L. Victoria	Gogo Falls			1500 - 1900 BP	Caprini	-0.44	1.95	Grazer		Chritz, K. L., Cerling, T. E., Freeman, K. H., Hildebrand, E. A., Janzen, A., & Prendergast, M. E. (2019). Climate, ecology, and the spread of herding in eastern Africa. Quaternary Science Reviews, 204, 119-132.
L. Victoria	Gogo Falls			1500 - 1900 BP	Caprini	0.19	1.86	Grazer		Chritz, K. L., Cerling, T. E., Freeman, K. H., Hildebrand, E. A., Janzen, A., & Prendergast, M. E. (2019). Climate, ecology, and the spread of herding in eastern Africa. Quaternary Science Reviews, 204, 119-132.
L. Victoria	Gogo Falls			1500 - 1900 BP	Caprini	0.35	3.25	Grazer		Chritz, K. L., Cerling, T. E., Freeman, K. H., Hildebrand, E. A., Janzen, A., & Prendergast, M. E. (2019). Climate, ecology, and the spread of herding in eastern Africa. Quaternary Science Reviews, 204, 119-132.
L. Victoria	Gogo Falls			1500 - 1900 BP	Caprini	0.47	4.27	Grazer		Chritz, K. L., Cerling, T. E., Freeman, K. H., Hildebrand, E. A., Janzen, A., & Prendergast, M. E. (2019). Climate, ecology, and the spread of herding in eastern Africa. Quaternary Science Reviews, 204, 119-132.
L. Victoria	Gogo Falls			1500 - 1900 BP	Caprini	0.52	3.84	Grazer		Chritz, K. L., Cerling, T. E., Freeman, K. H., Hildebrand, E. A., Janzen, A., & Prendergast, M. E. (2019). Climate, ecology, and the spread of herding in eastern Africa. Quaternary Science Reviews, 204, 119-132.
L. Victoria	Gogo Falls			1500 - 1900 BP	Caprini	0.73	1.62	Grazer		Chritz, K. L., Cerling, T. E., Freeman, K. H., Hildebrand, E. A., Janzen, A., & Prendergast, M. E. (2019). Climate, ecology, and the spread of herding in eastern Africa. Quaternary Science Reviews, 204, 119-132.
L. Victoria	Gogo Falls			1500 - 1900 BP	Caprini	0.92	0.72	Grazer		Chritz, K. L., Cerling, T. E., Freeman, K. H., Hildebrand, E. A., Janzen, A., & Prendergast, M. E. (2019). Climate, ecology, and the spread of herding in eastern Africa. Quaternary Science Reviews, 204, 119-132.
L. Victoria	Gogo Falls			1500 - 1900 BP	Caprini	1.66	1.34	Grazer		Chritz, K. L., Cerling, T. E., Freeman, K. H., Hildebrand, E. A., Janzen, A., & Prendergast, M. E. (2019). Climate, ecology, and the spread of herding in eastern Africa. Quaternary Science Reviews, 204, 119-132.
L. Victoria	Gogo Falls			1500 - 1900 BP	Caprini	2.19	3.03	Grazer		Chritz, K. L., Cerling, T. E., Freeman, K. H., Hildebrand, E. A., Janzen, A., & Prendergast, M. E. (2019). Climate, ecology, and the spread of herding in eastern Africa. Quaternary Science Reviews, 204, 119-132.
L. Victoria	Gogo Falls			1500 - 1900 BP	Caprini	2.6	2.88	Grazer		Chritz, K. L., Cerling, T. E., Freeman, K. H., Hildebrand, E. A., Janzen, A., & Prendergast, M. E. (2019). Climate, ecology, and the spread of herding in eastern Africa. Quaternary Science Reviews, 204, 119-132.
L. Victoria	Gogo Falls			1500 - 1900 BP	Sylvicapra grimmia	-8.81	-1.14	Browser		Chritz, K. L., Cerling, T. E., Freeman, K. H., Hildebrand, E. A., Janzen, A., & Prendergast, M. E. (2019). Climate, ecology, and the spread of herding in eastern Africa. Quaternary Science Reviews, 204, 119-132.
L. Victoria	Gogo Falls			1500 - 1900 BP	Equus sp.	0.79	1.31	Grazer		Chritz, K. L., Cerling, T. E., Freeman, K. H., Hildebrand, E. A., Janzen, A., & Prendergast, M. E. (2019). Climate, ecology, and the spread of herding in eastern Africa. Quaternary Science Reviews, 204, 119-132.
L. Victoria	Gogo Falls			1500 - 1900 BP	Equus sp.	0.9	2.43	Grazer		Chritz, K. L., Cerling, T. E., Freeman, K. H., Hildebrand, E. A., Janzen, A., & Prendergast, M. E. (2019). Climate, ecology, and the spread of herding in eastern Africa. Quaternary Science Reviews, 204, 119-132.
L. Victoria	Gogo Falls			1500 - 1900 BP	Equus sp.	1.34	-0.04	Grazer		Chritz, K. L., Cerling, T. E., Freeman, K. H., Hildebrand, E. A., Janzen, A., & Prendergast, M. E. (2019). Climate, ecology, and the spread of herding in eastern Africa. Quaternary Science Reviews, 204, 119-132.
L. Victoria	Gogo Falls			1500 - 1900 BP	Equus sp.	1.51	1.94	Grazer		Chritz, K. L., Cerling, T. E., Freeman, K. H., Hildebrand, E. A., Janzen, A., & Prendergast, M. E. (2019). Climate, ecology, and the spread of herding in eastern Africa. Quaternary Science Reviews, 204, 119-132.
L. Victoria	Gogo Falls			1500 - 1900 BP	Equus sp.	2	1.36	Grazer		Chritz, K. L., Cerling, T. E., Freeman, K. H., Hildebrand, E. A., Janzen, A., & Prendergast, M. E. (2019). Climate, ecology, and the spread of herding in eastern Africa. Quaternary Science Reviews, 204, 119-132.
L. Victoria	Gogo Falls			1500 - 1900 BP	Equus sp.	0.29	1.68	Grazer		Chritz, K. L., Cerling, T. E., Freeman, K. H., Hildebrand, E. A., Janzen, A., & Prendergast, M. E. (2019). Climate, ecology, and the spread of herding in eastern Africa. Quaternary Science Reviews, 204, 119-132.
L. Victoria	Gogo Falls			1500 - 1900 BP	Equus sp.	0.56	1.28	Grazer		Chritz, K. L., Cerling, T. E., Freeman, K. H., Hildebrand, E. A., Janzen, A., & Prendergast, M. E. (2019). Climate, ecology, and the spread of herding in eastern Africa. Quaternary Science Reviews, 204, 119-132.
L. Victoria	Gogo Falls			1500 - 1900 BP	Equus sp.	0.02	-0.28	Grazer		Chritz, K. L., Cerling, T. E., Freeman, K. H., Hildebrand, E. A., Janzen, A., & Prendergast, M. E. (2019). Climate, ecology, and the spread of herding in eastern Africa. Quaternary Science Reviews, 204, 119-132.
L. Victoria	Gogo Falls			1500 - 1900 BP	Equus sp.	0.13	1.02	Grazer		Chritz, K. L., Cerling, T. E., Freeman, K. H., Hildebrand, E. A., Janzen, A., & Prendergast, M. E. (2019). Climate, ecology, and the spread of herding in eastern Africa. Quaternary Science Reviews, 204, 119-132.
L. Victoria	Gogo Falls			1500 - 1900 BP	Equus sp.	0.14	1.43	Grazer		Chritz, K. L., Cerling, T. E., Freeman, K. H., Hildebrand, E. A., Janzen, A., & Prendergast, M. E. (2019). Climate, ecology, and the spread of herding in eastern Africa. Quaternary Science Reviews, 204, 119-132.
L. Victoria	Gogo Falls			1500 - 1900 BP	Equus sp.	0.45	-0.45	Grazer		Chritz, K. L., Cerling, T. E., Freeman, K. H., Hildebrand, E. A., Janzen, A., & Prendergast, M. E. (2019). Climate, ecology, and the spread of herding in eastern Africa. Quaternary Science Reviews, 204, 119-132.
L. Victoria	Gogo Falls			1500 - 1900 BP	Equus sp.	0.56	1.17	Grazer		Chritz, K. L., Cerling, T. E., Freeman, K. H., Hildebrand, E. A., Janzen, A., & Prendergast, M. E. (2019). Climate, ecology, and the spread of herding in eastern Africa. Quaternary Science Reviews, 204, 119-132.
L. Victoria	Gogo Falls			1500 - 1900 BP	Equus sp.	1.64	2.36	Grazer		Chritz, K. L., Cerling, T. E., Freeman, K. H., Hildebrand, E. A., Janzen, A., & Prendergast, M. E. (2019). Climate, ecology, and the spread of herding in eastern Africa. Quaternary Science Reviews, 204, 119-132.
L. Victoria	Gogo Falls			1500 - 1900 BP	Hippotragini	1.43	-2.13	Grazer		Chritz, K. L., Cerling, T. E., Freeman, K. H., Hildebrand, E. A., Janzen, A., & Prendergast, M. E. (2019). Climate, ecology, and the spread of herding in eastern Africa. Quaternary Science Reviews, 204, 119-132.
L. Victoria	Gogo Falls			1500 - 1900 BP	Hippotragini	2.67	0.25	Grazer		Chritz, K. L., Cerling, T. E., Freeman, K. H., Hildebrand, E. A., Janzen, A., & Prendergast, M. E. (2019). Climate, ecology, and the spread of herding in eastern Africa. Quaternary Science Reviews, 204, 119-132.
L. Victoria	Gogo Falls			1500 - 1900 BP	Hippotragini	0.35	1.14	Grazer		Chritz, K. L., Cerling, T. E., Freeman, K. H., Hildebrand, E. A., Janzen, A., & Prendergast, M. E. (2019). Climate, ecology, and the spread of herding in eastern Africa. Quaternary Science Reviews, 204, 119-132.
L. Victoria	Gogo Falls			1500 - 1900 BP	Hippotragini	2.32	0.42	Grazer		Chritz, K. L., Cerling, T. E., Freeman, K. H., Hildebrand, E. A., Janzen, A., & Prendergast, M. E. (2019). Climate, ecology, and the spread of herding in eastern Africa. Quaternary Science Reviews, 204, 119-132.
L. Victoria	Gogo Falls			1500 - 1900 BP	Ourebia ourebi	-0.95	2.12	Mixed Feeder		Chritz, K. L., Cerling, T. E., Freeman, K. H., Hildebrand, E. A., Janzen, A., & Prendergast, M. E. (2019). Climate, ecology, and the spread of herding in eastern Africa. Quaternary Science Reviews, 204, 119-132.
L. Victoria	Gogo Falls			1500 - 1900 BP	Ourebia ourebi	-0.6	0.9	Mixed Feeder		Chritz, K. L., Cerling, T. E., Freeman, K. H., Hildebrand, E. A., Janzen, A., & Prendergast, M. E. (2019). Climate, ecology, and the spread of herding in eastern Africa. Quaternary Science Reviews, 204, 119-132.
L. Victoria	Gogo Falls			1500 - 1900 BP	Ourebia ourebi	-0.3	1.91	Mixed Feeder		Chritz, K. L., Cerling, T. E., Freeman, K. H., Hildebrand, E. A., Janzen, A., & Prendergast, M. E. (2019). Climate, ecology, and the spread of herding in eastern Africa. Quaternary Science Reviews, 204, 119-132.
L. Victoria	Gogo Falls			1500 - 1900 BP	Ourebia ourebi	-0.01	-1.12	Mixed Feeder		Chritz, K. L., Cerling, T. E., Freeman, K. H., Hildebrand, E. A., Janzen, A., & Prendergast, M. E. (2019). Climate, ecology, and the spread of herding in eastern Africa. Quaternary Science Reviews, 204, 119-132.
L. Victoria	Gogo Falls			1500 - 1900 BP	Ourebia ourebi	0.92	0.76	Mixed Feeder		Chritz, K. L., Cerling, T. E., Freeman, K. H., Hildebrand, E. A., Janzen, A., & Prendergast, M. E. (2019). Climate, ecology, and the spread of herding in eastern Africa. Quaternary Science Reviews, 204, 119-132.
L. Victoria	Gogo Falls			1500 - 1900 BP	Ourebia ourebi	0.94	-2.99	Mixed Feeder		Chritz, K. L., Cerling, T. E., Freeman, K. H., Hildebrand, E. A., Janzen, A., & Prendergast, M. E. (2019). Climate, ecology, and the spread of herding in eastern Africa. Quaternary Science Reviews, 204, 119-132.
L. Victoria	Gogo Falls			1500 - 1900 BP	Ourebia ourebi	1.02	0.66	Mixed Feeder		Chritz, K. L., Cerling, T. E., Freeman, K. H., Hildebrand, E. A., Janzen, A., & Prendergast, M. E. (2019). Climate, ecology, and the spread of herding in eastern Africa. Quaternary Science Reviews, 204, 119-132.
L. Victoria	Gogo Falls			1500 - 1900 BP	Ourebia ourebi	1.2	0.54	Mixed Feeder		Chritz, K. L., Cerling, T. E., Freeman, K. H., Hildebrand, E. A., Janzen, A., & Prendergast, M. E. (2019). Climate, ecology, and the spread of herding in eastern Africa. Quaternary Science Reviews, 204, 119-132.
L. Victoria	Gogo Falls			1500 - 1900 BP	Phacochoerus sp.	-1.23	-1.9	Grazer		Chritz, K. L., Cerling, T. E., Freeman, K. H., Hildebrand, E. A., Janzen, A., & Prendergast, M. E. (2019). Climate, ecology, and the spread of herding in eastern Africa. Quaternary Science Reviews, 204, 119-132.
L. Victoria	Gogo Falls			1500 - 1900 BP	Phacochoerus sp.	-0.29	-0.23	Grazer		Chritz, K. L., Cerling, T. E., Freeman, K. H., Hildebrand, E. A., Janzen, A., & Prendergast, M. E. (2019). Climate, ecology, and the spread of herding in eastern Africa. Quaternary Science Reviews, 204, 119-132.
L. Victoria	Gogo Falls			1500 - 1900 BP	Phacochoerus sp.	0.39	1.66	Grazer		Chritz, K. L., Cerling, T. E., Freeman, K. H., Hildebrand, E. A., Janzen, A., & Prendergast, M. E. (2019). Climate, ecology, and the spread of herding in eastern Africa. Quaternary Science Reviews, 204, 119-132.
L. Victoria	Gogo Falls			1500 - 1900 BP	Phacochoerus sp.	0.67	1.37	Grazer		Chritz, K. L., Cerling, T. E., Freeman, K. H., Hildebrand, E. A., Janzen, A., & Prendergast, M. E. (2019). Climate, ecology, and the spread of herding in eastern Africa. Quaternary Science Reviews, 204, 119-132.
L. Victoria	Gogo Falls			1500 - 1900 BP	Potamochoerus larvatus	-3.86	-2.78	Browser		Chritz, K. L., Cerling, T. E., Freeman, K. H., Hildebrand, E. A., Janzen, A., & Prendergast, M. E. (2019). Climate, ecology, and the spread of herding in eastern Africa. Quaternary Science Reviews, 204, 119-132.
L. Victoria	Gogo Falls			1500 - 1900 BP	Reduncini	-0.97	-0.16	Grazer		Chritz, K. L., Cerling, T. E., Freeman, K. H., Hildebrand, E. A., Janzen, A., & Prendergast, M. E. (2019). Climate, ecology, and the spread of herding in eastern Africa. Quaternary Science Reviews, 204, 119-132.
L. Victoria	Gogo Falls			1500 - 1900 BP	Reduncini	-0.44	-0.32	Grazer		Chritz, K. L., Cerling, T. E., Freeman, K. H., Hildebrand, E. A., Janzen, A., & Prendergast, M. E. (2019). Climate, ecology, and the spread of herding in eastern Africa. Quaternary Science Reviews, 204, 119-132.
L. Victoria	Gogo Falls			1500 - 1900 BP	Reduncini	-0.01	0.56	Grazer		Chritz, K. L., Cerling, T. E., Freeman, K. H., Hildebrand, E. A., Janzen, A., & Prendergast, M. E. (2019). Climate, ecology, and the spread of herding in eastern Africa. Quaternary Science Reviews, 204, 119-132.
L. Victoria	Gogo Falls			1500 - 1900 BP	Reduncini	2.3	1.3	Grazer		Chritz, K. L., Cerling, T. E., Freeman, K. H., Hildebrand, E. A., Janzen, A., & Prendergast, M. E. (2019). Climate, ecology, and the spread of herding in eastern Africa. Quaternary Science Reviews, 204, 119-132.
L. Victoria	Gogo Falls			1500 - 1900 BP	Reduncini	2.8	0.89	Grazer		Chritz, K. L., Cerling, T. E., Freeman, K. H., Hildebrand, E. A., Janzen, A., & Prendergast, M. E. (2019). Climate, ecology, and the spread of herding in eastern Africa. Quaternary Science Reviews, 204, 119-132.
L. Victoria	Gogo Falls			1500 - 1900 BP	Taurotragus oryx	-9.57	-0.17	Browser		Chritz, K. L., Cerling, T. E., Freeman, K. H., Hildebrand, E. A., Janzen, A., & Prendergast, M. E. (2019). Climate, ecology, and the spread of herding in eastern Africa. Quaternary Science Reviews, 204, 119-132.
L. Victoria	Gogo Falls			1500 - 1900 BP	Taurotragus oryx	-5.77	2.31	Browser		Chritz, K. L., Cerling, T. E., Freeman, K. H., Hildebrand, E. A., Janzen, A., & Prendergast, M. E. (2019). Climate, ecology, and the spread of herding in eastern Africa. Quaternary Science Reviews, 204, 119-132.
L. Victoria	Gogo Falls			1500 - 1900 BP	Taurotragus oryx	-3.94	0.01	Browser		Chritz, K. L., Cerling, T. E., Freeman, K. H., Hildebrand, E. A., Janzen, A., & Prendergast, M. E. (2019). Climate, ecology, and the spread of herding in eastern Africa. Quaternary Science Reviews, 204, 119-132.
L. Victoria	Gogo Falls			1500 - 1900 BP	Taurotragus oryx	-6.91	-0.59	Browser		Chritz, K. L., Cerling, T. E., Freeman, K. H., Hildebrand, E. A., Janzen, A., & Prendergast, M. E. (2019). Climate, ecology, and the spread of herding in eastern Africa. Quaternary Science Reviews, 204, 119-132.
L. Victoria	Gogo Falls			1500 - 1900 BP	Taurotragus oryx	-4.13	1.21	Browser		Chritz, K. L., Cerling, T. E., Freeman, K. H., Hildebrand, E. A., Janzen, A., & Prendergast, M. E. (2019). Climate, ecology, and the spread of herding in eastern Africa. Quaternary Science Reviews, 204, 119-132.
L. Victoria	Gogo Falls			1500 - 1900 BP	Hippopotamus amphibius	0.16	-2.64	Grazer		Chritz, K. L., Cerling, T. E., Freeman, K. H., Hildebrand, E. A., Janzen, A., & Prendergast, M. E. (2019). Climate, ecology, and the spread of herding in eastern Africa. Quaternary Science Reviews, 204, 119-132.
L. Victoria	Gogo Falls			1500 - 1900 BP	Hippopotamus amphibius	0.96	-2.58	Grazer		Chritz, K. L., Cerling, T. E., Freeman, K. H., Hildebrand, E. A., Janzen, A., & Prendergast, M. E. (2019). Climate, ecology, and the spread of herding in eastern Africa. Quaternary Science Reviews, 204, 119-132.
L. Victoria	Kanam East/Kanam Two			8000 - 8400 BP	Alcelaphus buselaphus	-0.12	-1.36	Grazer		Chritz, K. L., Cerling, T. E., Freeman, K. H., Hildebrand, E. A., Janzen, A., & Prendergast, M. E. (2019). Climate, ecology, and the spread of herding in eastern Africa. Quaternary Science Reviews, 204, 119-132.
L. Victoria	Kanam East/Kanam Two			8000 - 8400 BP	Hippopotamus amphibius	-6.45	-3.65	Grazer		Chritz, K. L., Cerling, T. E., Freeman, K. H., Hildebrand, E. A., Janzen, A., & Prendergast, M. E. (2019). Climate, ecology, and the spread of herding in eastern Africa. Quaternary Science Reviews, 204, 119-132.
L. Victoria	Kanam East/Kanam Two			8000 - 8400 BP	Hippopotamus amphibius	-2.89	-0.88	Grazer		Chritz, K. L., Cerling, T. E., Freeman, K. H., Hildebrand, E. A., Janzen, A., & Prendergast, M. E. (2019). Climate, ecology, and the spread of herding in eastern Africa. Quaternary Science Reviews, 204, 119-132.
L. Victoria	Kanam East/Kanam Two			8000 - 8400 BP	Hippopotamus amphibius	-1.93	-3.49	Grazer		Chritz, K. L., Cerling, T. E., Freeman, K. H., Hildebrand, E. A., Janzen, A., & Prendergast, M. E. (2019). Climate, ecology, and the spread of herding in eastern Africa. Quaternary Science Reviews, 204, 119-132.
L. Victoria	Kanam East/Kanam Two			8000 - 8400 BP	Phacochoerus sp.	0.34	-0.18	Grazer		Chritz, K. L., Cerling, T. E., Freeman, K. H., Hildebrand, E. A., Janzen, A., & Prendergast, M. E. (2019). Climate, ecology, and the spread of herding in eastern Africa. Quaternary Science Reviews, 204, 119-132.
L. Victoria	Kanam East/Kanam Two			8000 - 8400 BP	Syncerus caffer	0.7	-1.89	Grazer		Chritz, K. L., Cerling, T. E., Freeman, K. H., Hildebrand, E. A., Janzen, A., & Prendergast, M. E. (2019). Climate, ecology, and the spread of herding in eastern Africa. Quaternary Science Reviews, 204, 119-132.
L. Victoria	Kanam East/Kanam Two			8000 - 8400 BP	Syncerus caffer	3.26	-0.61	Grazer		Chritz, K. L., Cerling, T. E., Freeman, K. H., Hildebrand, E. A., Janzen, A., & Prendergast, M. E. (2019). Climate, ecology, and the spread of herding in eastern Africa. Quaternary Science Reviews, 204, 119-132.
L. Victoria	Kanam East/Kanam Two			8000 - 8400 BP	Alcelaphine	2.15	-1.05	Grazer		Chritz, K. L., Cerling, T. E., Freeman, K. H., Hildebrand, E. A., Janzen, A., & Prendergast, M. E. (2019). Climate, ecology, and the spread of herding in eastern Africa. Quaternary Science Reviews, 204, 119-132.
L. Victoria	Kanam East/Kanam Two			8000 - 8400 BP	Bovid	2.86	-0.68	Grazer		Chritz, K. L., Cerling, T. E., Freeman, K. H., Hildebrand, E. A., Janzen, A., & Prendergast, M. E. (2019). Climate, ecology, and the spread of herding in eastern Africa. Quaternary Science Reviews, 204, 119-132.
L. Victoria	Kanam East/Kanam Two			8000 - 8400 BP	Hippopotamus amphibius	-3.87	-3.49	Grazer		Chritz, K. L., Cerling, T. E., Freeman, K. H., Hildebrand, E. A., Janzen, A., & Prendergast, M. E. (2019). Climate, ecology, and the spread of herding in eastern Africa. Quaternary Science Reviews, 204, 119-132.
L. Victoria	Kanam East/Kanam Two			8000 - 8400 BP	Loxodonta africana	-6.96	-1.43	Browser		Chritz, K. L., Cerling, T. E., Freeman, K. H., Hildebrand, E. A., Janzen, A., & Prendergast, M. E. (2019). Climate, ecology, and the spread of herding in eastern Africa. Quaternary Science Reviews, 204, 119-132.
L. Victoria	Kanam East/Kanam Two			8000 - 8400 BP	Phacochoerus sp.	-8.74	-2.44	Grazer		Chritz, K. L., Cerling, T. E., Freeman, K. H., Hildebrand, E. A., Janzen, A., & Prendergast, M. E. (2019). Climate, ecology, and the spread of herding in eastern Africa. Quaternary Science Reviews, 204, 119-132.
L. Victoria	Kanam East/Kanam Two			8000 - 8400 BP	Redunca redunca	2.07	-1.45	Grazer		Chritz, K. L., Cerling, T. E., Freeman, K. H., Hildebrand, E. A., Janzen, A., & Prendergast, M. E. (2019). Climate, ecology, and the spread of herding in eastern Africa. Quaternary Science Reviews, 204, 119-132.
L. Victoria	Kanam East/Kanam Two			8000 - 8400 BP	Syncerus caffer	-0.79	0.36	Grazer		Chritz, K. L., Cerling, T. E., Freeman, K. H., Hildebrand, E. A., Janzen, A., & Prendergast, M. E. (2019). Climate, ecology, and the spread of herding in eastern Africa. Quaternary Science Reviews, 204, 119-132.
L. Turkana	Lothagam Lokam			8100 - 8500 BP	Alcelaphine	-1.99	-0.17	Grazer		Chritz, K. L., Cerling, T. E., Freeman, K. H., Hildebrand, E. A., Janzen, A., & Prendergast, M. E. (2019). Climate, ecology, and the spread of herding in eastern Africa. Quaternary Science Reviews, 204, 119-132.
L. Turkana	Lothagam Lokam			8100 - 8500 BP	Papio sp.	-6.87	-0.51	Omnivore		Chritz, K. L., Cerling, T. E., Freeman, K. H., Hildebrand, E. A., Janzen, A., & Prendergast, M. E. (2019). Climate, ecology, and the spread of herding in eastern Africa. Quaternary Science Reviews, 204, 119-132.
L. Turkana	Lothagam Lokam			8100 - 8500 BP	Mammal	-1.49	-0.01	Grazer		Chritz, K. L., Cerling, T. E., Freeman, K. H., Hildebrand, E. A., Janzen, A., & Prendergast, M. E. (2019). Climate, ecology, and the spread of herding in eastern Africa. Quaternary Science Reviews, 204, 119-132.
L. Turkana	Lothagam Lokam			8100 - 8500 BP	Mammal	0.14	3.27	Grazer		Chritz, K. L., Cerling, T. E., Freeman, K. H., Hildebrand, E. A., Janzen, A., & Prendergast, M. E. (2019). Climate, ecology, and the spread of herding in eastern Africa. Quaternary Science Reviews, 204, 119-132.
L. Turkana	Lothagam Lokam			8100 - 8500 BP	Mammal	0.16	0.87	Grazer		Chritz, K. L., Cerling, T. E., Freeman, K. H., Hildebrand, E. A., Janzen, A., & Prendergast, M. E. (2019). Climate, ecology, and the spread of herding in eastern Africa. Quaternary Science Reviews, 204, 119-132.
L. Turkana	Lothagam Lokam			8100 - 8500 BP	Mammal	1.61	2.26	Grazer		Chritz, K. L., Cerling, T. E., Freeman, K. H., Hildebrand, E. A., Janzen, A., & Prendergast, M. E. (2019). Climate, ecology, and the spread of herding in eastern Africa. Quaternary Science Reviews, 204, 119-132.
L. Turkana	Lothagam Lokam			8100 - 8500 BP	Mammal	2.05	-0.39	Grazer		Chritz, K. L., Cerling, T. E., Freeman, K. H., Hildebrand, E. A., Janzen, A., & Prendergast, M. E. (2019). Climate, ecology, and the spread of herding in eastern Africa. Quaternary Science Reviews, 204, 119-132.
L. Turkana	Lothagam Lokam			8100 - 8500 BP	Equus sp.	-0.09	3.52	Grazer		Chritz, K. L., Cerling, T. E., Freeman, K. H., Hildebrand, E. A., Janzen, A., & Prendergast, M. E. (2019). Climate, ecology, and the spread of herding in eastern Africa. Quaternary Science Reviews, 204, 119-132.
L. Turkana	Lothagam Lokam			8100 - 8500 BP	Equus sp.	0.51	4.78	Grazer		Chritz, K. L., Cerling, T. E., Freeman, K. H., Hildebrand, E. A., Janzen, A., & Prendergast, M. E. (2019). Climate, ecology, and the spread of herding in eastern Africa. Quaternary Science Reviews, 204, 119-132.
L. Turkana	Lothagam Lokam			8100 - 8500 BP	Equus sp.	0.7	2.95	Grazer		Chritz, K. L., Cerling, T. E., Freeman, K. H., Hildebrand, E. A., Janzen, A., & Prendergast, M. E. (2019). Climate, ecology, and the spread of herding in eastern Africa. Quaternary Science Reviews, 204, 119-132.
L. Turkana	Lothagam Lokam			8100 - 8500 BP	Equus sp.	1.31	4.11	Grazer		Chritz, K. L., Cerling, T. E., Freeman, K. H., Hildebrand, E. A., Janzen, A., & Prendergast, M. E. (2019). Climate, ecology, and the spread of herding in eastern Africa. Quaternary Science Reviews, 204, 119-132.
L. Turkana	Lothagam Lokam			8100 - 8500 BP	Hippopotamus amphibius	-2.17	-1.83	Grazer		Chritz, K. L., Cerling, T. E., Freeman, K. H., Hildebrand, E. A., Janzen, A., & Prendergast, M. E. (2019). Climate, ecology, and the spread of herding in eastern Africa. Quaternary Science Reviews, 204, 119-132.
L. Turkana	Lothagam Lokam			8100 - 8500 BP	Hippopotamus amphibius	-0.86	-2.19	Grazer		Chritz, K. L., Cerling, T. E., Freeman, K. H., Hildebrand, E. A., Janzen, A., & Prendergast, M. E. (2019). Climate, ecology, and the spread of herding in eastern Africa. Quaternary Science Reviews, 204, 119-132.
L. Turkana	Lothagam Lokam			8100 - 8500 BP	Hippopotamus amphibius	-0.04	-2.43	Grazer		Chritz, K. L., Cerling, T. E., Freeman, K. H., Hildebrand, E. A., Janzen, A., & Prendergast, M. E. (2019). Climate, ecology, and the spread of herding in eastern Africa. Quaternary Science Reviews, 204, 119-132.
L. Turkana	Lothagam Lokam			8100 - 8500 BP	Hippopotamus amphibius	0.01	-2.09	Grazer		Chritz, K. L., Cerling, T. E., Freeman, K. H., Hildebrand, E. A., Janzen, A., & Prendergast, M. E. (2019). Climate, ecology, and the spread of herding in eastern Africa. Quaternary Science Reviews, 204, 119-132.
L. Turkana	Lothagam Lokam			8100 - 8500 BP	Hippopotamus amphibius	0.1	-1.75	Grazer		Chritz, K. L., Cerling, T. E., Freeman, K. H., Hildebrand, E. A., Janzen, A., & Prendergast, M. E. (2019). Climate, ecology, and the spread of herding in eastern Africa. Quaternary Science Reviews, 204, 119-132.
L. Turkana	Lothagam Lokam			8100 - 8500 BP	Phacochoerus sp.	-1.04	-0.77	Grazer		Chritz, K. L., Cerling, T. E., Freeman, K. H., Hildebrand, E. A., Janzen, A., & Prendergast, M. E. (2019). Climate, ecology, and the spread of herding in eastern Africa. Quaternary Science Reviews, 204, 119-132.
L. Turkana	Lothagam Lokam			8100 - 8500 BP	Phacochoerus sp.	-0.16	0.55	Grazer		Chritz, K. L., Cerling, T. E., Freeman, K. H., Hildebrand, E. A., Janzen, A., & Prendergast, M. E. (2019). Climate, ecology, and the spread of herding in eastern Africa. Quaternary Science Reviews, 204, 119-132.
L. Turkana	Lothagam Lokam			8100 - 8500 BP	Phacochoerus sp.	1.15	-1.23	Grazer		Chritz, K. L., Cerling, T. E., Freeman, K. H., Hildebrand, E. A., Janzen, A., & Prendergast, M. E. (2019). Climate, ecology, and the spread of herding in eastern Africa. Quaternary Science Reviews, 204, 119-132.
L. Turkana	Lothagam Lokam			8100 - 8500 BP	Phacochoerus sp.	1.48	-1.07	Grazer		Chritz, K. L., Cerling, T. E., Freeman, K. H., Hildebrand, E. A., Janzen, A., & Prendergast, M. E. (2019). Climate, ecology, and the spread of herding in eastern Africa. Quaternary Science Reviews, 204, 119-132.
L. Turkana	Lothagam Lokam			8100 - 8500 BP	Phacochoerus sp.	3.05	-0.48	Grazer		Chritz, K. L., Cerling, T. E., Freeman, K. H., Hildebrand, E. A., Janzen, A., & Prendergast, M. E. (2019). Climate, ecology, and the spread of herding in eastern Africa. Quaternary Science Reviews, 204, 119-132.
L. Turkana	Lothagam Lokam			8100 - 8500 BP	Syncerus caffer	-0.2	1.77	Grazer		Chritz, K. L., Cerling, T. E., Freeman, K. H., Hildebrand, E. A., Janzen, A., & Prendergast, M. E. (2019). Climate, ecology, and the spread of herding in eastern Africa. Quaternary Science Reviews, 204, 119-132.
L. Turkana	Lothagam Lokam			8100 - 8500 BP	Syncerus caffer	2.77	-0.84	Grazer		Chritz, K. L., Cerling, T. E., Freeman, K. H., Hildebrand, E. A., Janzen, A., & Prendergast, M. E. (2019). Climate, ecology, and the spread of herding in eastern Africa. Quaternary Science Reviews, 204, 119-132.
L. Turkana	Lothagam Lokam			8100 - 8500 BP	Oryx beisa	1.43	4.89	Grazer		Chritz, K. L., Cerling, T. E., Freeman, K. H., Hildebrand, E. A., Janzen, A., & Prendergast, M. E. (2019). Climate, ecology, and the spread of herding in eastern Africa. Quaternary Science Reviews, 204, 119-132.
L. Victoria	Luanda			8200 - 8600 BP	Alcelaphine	3.09	0.33	Grazer		Chritz, K. L., Cerling, T. E., Freeman, K. H., Hildebrand, E. A., Janzen, A., & Prendergast, M. E. (2019). Climate, ecology, and the spread of herding in eastern Africa. Quaternary Science Reviews, 204, 119-132.
L. Victoria	Luanda			8200 - 8600 BP	Alcelaphine	2.42	-2.83	Grazer		Chritz, K. L., Cerling, T. E., Freeman, K. H., Hildebrand, E. A., Janzen, A., & Prendergast, M. E. (2019). Climate, ecology, and the spread of herding in eastern Africa. Quaternary Science Reviews, 204, 119-132.
L. Victoria	Luanda			8200 - 8600 BP	Bovid	3.22	-1.16	Grazer		Chritz, K. L., Cerling, T. E., Freeman, K. H., Hildebrand, E. A., Janzen, A., & Prendergast, M. E. (2019). Climate, ecology, and the spread of herding in eastern Africa. Quaternary Science Reviews, 204, 119-132.
L. Victoria	Luanda			8200 - 8600 BP	Bovid	1.38	-0.19	Grazer		Chritz, K. L., Cerling, T. E., Freeman, K. H., Hildebrand, E. A., Janzen, A., & Prendergast, M. E. (2019). Climate, ecology, and the spread of herding in eastern Africa. Quaternary Science Reviews, 204, 119-132.
L. Victoria	Luanda			8200 - 8600 BP	Bovid	3.64	-0.77	Grazer		Chritz, K. L., Cerling, T. E., Freeman, K. H., Hildebrand, E. A., Janzen, A., & Prendergast, M. E. (2019). Climate, ecology, and the spread of herding in eastern Africa. Quaternary Science Reviews, 204, 119-132.
L. Victoria	Luanda			8200 - 8600 BP	Bovid	0.51	2.31	Grazer		Chritz, K. L., Cerling, T. E., Freeman, K. H., Hildebrand, E. A., Janzen, A., & Prendergast, M. E. (2019). Climate, ecology, and the spread of herding in eastern Africa. Quaternary Science Reviews, 204, 119-132.
L. Victoria	Luanda			8200 - 8600 BP	Bovid	1.18	-3.37	Grazer		Chritz, K. L., Cerling, T. E., Freeman, K. H., Hildebrand, E. A., Janzen, A., & Prendergast, M. E. (2019). Climate, ecology, and the spread of herding in eastern Africa. Quaternary Science Reviews, 204, 119-132.
L. Victoria	Luanda			8200 - 8600 BP	Bovid	1.31	-1.45	Grazer		Chritz, K. L., Cerling, T. E., Freeman, K. H., Hildebrand, E. A., Janzen, A., & Prendergast, M. E. (2019). Climate, ecology, and the spread of herding in eastern Africa. Quaternary Science Reviews, 204, 119-132.
L. Victoria	Luanda			8200 - 8600 BP	Bovid	1.67	-0.96	Grazer		Chritz, K. L., Cerling, T. E., Freeman, K. H., Hildebrand, E. A., Janzen, A., & Prendergast, M. E. (2019). Climate, ecology, and the spread of herding in eastern Africa. Quaternary Science Reviews, 204, 119-132.
L. Victoria	Luanda			8200 - 8600 BP	Bovid	1.74	-2.03	Grazer		Chritz, K. L., Cerling, T. E., Freeman, K. H., Hildebrand, E. A., Janzen, A., & Prendergast, M. E. (2019). Climate, ecology, and the spread of herding in eastern Africa. Quaternary Science Reviews, 204, 119-132.
L. Victoria	Luanda			8200 - 8600 BP	Connochaetes taurinus	1.61	-0.74	Grazer		Chritz, K. L., Cerling, T. E., Freeman, K. H., Hildebrand, E. A., Janzen, A., & Prendergast, M. E. (2019). Climate, ecology, and the spread of herding in eastern Africa. Quaternary Science Reviews, 204, 119-132.
L. Victoria	Luanda			8200 - 8600 BP	Connochaetes taurinus	2.64	-0.27	Grazer		Chritz, K. L., Cerling, T. E., Freeman, K. H., Hildebrand, E. A., Janzen, A., & Prendergast, M. E. (2019). Climate, ecology, and the spread of herding in eastern Africa. Quaternary Science Reviews, 204, 119-132.
L. Victoria	Luanda			8200 - 8600 BP	Connochaetes taurinus	-0.1	0.35	Grazer		Chritz, K. L., Cerling, T. E., Freeman, K. H., Hildebrand, E. A., Janzen, A., & Prendergast, M. E. (2019). Climate, ecology, and the spread of herding in eastern Africa. Quaternary Science Reviews, 204, 119-132.
L. Victoria	Luanda			8200 - 8600 BP	Connochaetes taurinus	1.62	0.03	Grazer		Chritz, K. L., Cerling, T. E., Freeman, K. H., Hildebrand, E. A., Janzen, A., & Prendergast, M. E. (2019). Climate, ecology, and the spread of herding in eastern Africa. Quaternary Science Reviews, 204, 119-132.
L. Victoria	Luanda			8200 - 8600 BP	Connochaetes taurinus	2.58	0.64	Grazer		Chritz, K. L., Cerling, T. E., Freeman, K. H., Hildebrand, E. A., Janzen, A., & Prendergast, M. E. (2019). Climate, ecology, and the spread of herding in eastern Africa. Quaternary Science Reviews, 204, 119-132.
L. Victoria	Luanda			8200 - 8600 BP	Connochaetes taurinus	3.4	0.24	Grazer		Chritz, K. L., Cerling, T. E., Freeman, K. H., Hildebrand, E. A., Janzen, A., & Prendergast, M. E. (2019). Climate, ecology, and the spread of herding in eastern Africa. Quaternary Science Reviews, 204, 119-132.
L. Victoria	Luanda			8200 - 8600 BP	Connochaetes taurinus	3.55	-0.47	Grazer		Chritz, K. L., Cerling, T. E., Freeman, K. H., Hildebrand, E. A., Janzen, A., & Prendergast, M. E. (2019). Climate, ecology, and the spread of herding in eastern Africa. Quaternary Science Reviews, 204, 119-132.
L. Victoria	Luanda			8200 - 8600 BP	Equus sp.	0.59	-0.63	Grazer		Chritz, K. L., Cerling, T. E., Freeman, K. H., Hildebrand, E. A., Janzen, A., & Prendergast, M. E. (2019). Climate, ecology, and the spread of herding in eastern Africa. Quaternary Science Reviews, 204, 119-132.
L. Victoria	Luanda			8200 - 8600 BP	Hippopotamus amphibius	-5.72	-4.07	Grazer		Chritz, K. L., Cerling, T. E., Freeman, K. H., Hildebrand, E. A., Janzen, A., & Prendergast, M. E. (2019). Climate, ecology, and the spread of herding in eastern Africa. Quaternary Science Reviews, 204, 119-132.
L. Victoria	Luanda			8200 - 8600 BP	Hippopotamus amphibius	-5.54	-2.3	Grazer		Chritz, K. L., Cerling, T. E., Freeman, K. H., Hildebrand, E. A., Janzen, A., & Prendergast, M. E. (2019). Climate, ecology, and the spread of herding in eastern Africa. Quaternary Science Reviews, 204, 119-132.
L. Victoria	Luanda			8200 - 8600 BP	Hippopotamus amphibius	-5.48	-4.58	Grazer		Chritz, K. L., Cerling, T. E., Freeman, K. H., Hildebrand, E. A., Janzen, A., & Prendergast, M. E. (2019). Climate, ecology, and the spread of herding in eastern Africa. Quaternary Science Reviews, 204, 119-132.
L. Victoria	Luanda			8200 - 8600 BP	Hippopotamus amphibius	-3.35	-3	Grazer		Chritz, K. L., Cerling, T. E., Freeman, K. H., Hildebrand, E. A., Janzen, A., & Prendergast, M. E. (2019). Climate, ecology, and the spread of herding in eastern Africa. Quaternary Science Reviews, 204, 119-132.
L. Victoria	Luanda			8200 - 8600 BP	Hippopotamus amphibius	-3.23	-2.81	Grazer		Chritz, K. L., Cerling, T. E., Freeman, K. H., Hildebrand, E. A., Janzen, A., & Prendergast, M. E. (2019). Climate, ecology, and the spread of herding in eastern Africa. Quaternary Science Reviews, 204, 119-132.
L. Victoria	Luanda			8200 - 8600 BP	Hippopotamus amphibius	-1.88	-3.13	Grazer		Chritz, K. L., Cerling, T. E., Freeman, K. H., Hildebrand, E. A., Janzen, A., & Prendergast, M. E. (2019). Climate, ecology, and the spread of herding in eastern Africa. Quaternary Science Reviews, 204, 119-132.
L. Victoria	Luanda			8200 - 8600 BP	Kobus ellipsiprymnus	1.51	-1.21	Grazer		Chritz, K. L., Cerling, T. E., Freeman, K. H., Hildebrand, E. A., Janzen, A., & Prendergast, M. E. (2019). Climate, ecology, and the spread of herding in eastern Africa. Quaternary Science Reviews, 204, 119-132.
L. Victoria	Luanda			8200 - 8600 BP	Kobus ellipsiprymnus	2.37	-4.67	Grazer		Chritz, K. L., Cerling, T. E., Freeman, K. H., Hildebrand, E. A., Janzen, A., & Prendergast, M. E. (2019). Climate, ecology, and the spread of herding in eastern Africa. Quaternary Science Reviews, 204, 119-132.
L. Victoria	Luanda			8200 - 8600 BP	Kobus ellipsiprymnus	3.04	-0.14	Grazer		Chritz, K. L., Cerling, T. E., Freeman, K. H., Hildebrand, E. A., Janzen, A., & Prendergast, M. E. (2019). Climate, ecology, and the spread of herding in eastern Africa. Quaternary Science Reviews, 204, 119-132.
L. Victoria	Luanda			8200 - 8600 BP	Kobus kob	1.3	-1.36	Grazer		Chritz, K. L., Cerling, T. E., Freeman, K. H., Hildebrand, E. A., Janzen, A., & Prendergast, M. E. (2019). Climate, ecology, and the spread of herding in eastern Africa. Quaternary Science Reviews, 204, 119-132.
L. Victoria	Luanda			8200 - 8600 BP	Kobus kob	1.76	-0.97	Grazer		Chritz, K. L., Cerling, T. E., Freeman, K. H., Hildebrand, E. A., Janzen, A., & Prendergast, M. E. (2019). Climate, ecology, and the spread of herding in eastern Africa. Quaternary Science Reviews, 204, 119-132.
L. Victoria	Luanda			8200 - 8600 BP	Kobus kob	3.02	0.02	Grazer		Chritz, K. L., Cerling, T. E., Freeman, K. H., Hildebrand, E. A., Janzen, A., & Prendergast, M. E. (2019). Climate, ecology, and the spread of herding in eastern Africa. Quaternary Science Reviews, 204, 119-132.
L. Victoria	Luanda			8200 - 8600 BP	Phacochoerus sp.	0.23	-0.58	Grazer		Chritz, K. L., Cerling, T. E., Freeman, K. H., Hildebrand, E. A., Janzen, A., & Prendergast, M. E. (2019). Climate, ecology, and the spread of herding in eastern Africa. Quaternary Science Reviews, 204, 119-132.
L. Victoria	Luanda			8200 - 8600 BP	Phacochoerus sp.	1.09	1.37	Grazer		Chritz, K. L., Cerling, T. E., Freeman, K. H., Hildebrand, E. A., Janzen, A., & Prendergast, M. E. (2019). Climate, ecology, and the spread of herding in eastern Africa. Quaternary Science Reviews, 204, 119-132.
L. Victoria	Luanda			8200 - 8600 BP	Potamochoerus larvatus	-11.75	-5.53	Omnivore		Chritz, K. L., Cerling, T. E., Freeman, K. H., Hildebrand, E. A., Janzen, A., & Prendergast, M. E. (2019). Climate, ecology, and the spread of herding in eastern Africa. Quaternary Science Reviews, 204, 119-132.
L. Victoria	Luanda			8200 - 8600 BP	Potamochoerus larvatus	-7.82	-4.15	Omnivore		Chritz, K. L., Cerling, T. E., Freeman, K. H., Hildebrand, E. A., Janzen, A., & Prendergast, M. E. (2019). Climate, ecology, and the spread of herding in eastern Africa. Quaternary Science Reviews, 204, 119-132.
L. Victoria	Luanda			8200 - 8600 BP	Redunca sp.	0.25	0.01	Grazer		Chritz, K. L., Cerling, T. E., Freeman, K. H., Hildebrand, E. A., Janzen, A., & Prendergast, M. E. (2019). Climate, ecology, and the spread of herding in eastern Africa. Quaternary Science Reviews, 204, 119-132.
L. Victoria	Luanda			8200 - 8600 BP	Redunca sp.	3.01	-1.54	Grazer		Chritz, K. L., Cerling, T. E., Freeman, K. H., Hildebrand, E. A., Janzen, A., & Prendergast, M. E. (2019). Climate, ecology, and the spread of herding in eastern Africa. Quaternary Science Reviews, 204, 119-132.
L. Victoria	Luanda			8200 - 8600 BP	Syncerus caffer	3.36	-1.76	Grazer		Chritz, K. L., Cerling, T. E., Freeman, K. H., Hildebrand, E. A., Janzen, A., & Prendergast, M. E. (2019). Climate, ecology, and the spread of herding in eastern Africa. Quaternary Science Reviews, 204, 119-132.
L. Victoria	Luanda			8200 - 8600 BP	Syncerus caffer	-1.41	0.32	Grazer		Chritz, K. L., Cerling, T. E., Freeman, K. H., Hildebrand, E. A., Janzen, A., & Prendergast, M. E. (2019). Climate, ecology, and the spread of herding in eastern Africa. Quaternary Science Reviews, 204, 119-132.
L. Victoria	Luanda			8200 - 8600 BP	Syncerus caffer	0.09	-0.61	Grazer		Chritz, K. L., Cerling, T. E., Freeman, K. H., Hildebrand, E. A., Janzen, A., & Prendergast, M. E. (2019). Climate, ecology, and the spread of herding in eastern Africa. Quaternary Science Reviews, 204, 119-132.
L. Victoria	Luanda			8200 - 8600 BP	Syncerus caffer	0.46	-0.69	Grazer		Chritz, K. L., Cerling, T. E., Freeman, K. H., Hildebrand, E. A., Janzen, A., & Prendergast, M. E. (2019). Climate, ecology, and the spread of herding in eastern Africa. Quaternary Science Reviews, 204, 119-132.
L. Victoria	Luanda			8200 - 8600 BP	Syncerus caffer	0.67	0.46	Grazer		Chritz, K. L., Cerling, T. E., Freeman, K. H., Hildebrand, E. A., Janzen, A., & Prendergast, M. E. (2019). Climate, ecology, and the spread of herding in eastern Africa. Quaternary Science Reviews, 204, 119-132.
L. Victoria	Luanda			8200 - 8600 BP	Syncerus caffer	1.51	-3.29	Grazer		Chritz, K. L., Cerling, T. E., Freeman, K. H., Hildebrand, E. A., Janzen, A., & Prendergast, M. E. (2019). Climate, ecology, and the spread of herding in eastern Africa. Quaternary Science Reviews, 204, 119-132.
L. Victoria	Luanda			8200 - 8600 BP	Syncerus caffer	1.85	-1.7	Grazer		Chritz, K. L., Cerling, T. E., Freeman, K. H., Hildebrand, E. A., Janzen, A., & Prendergast, M. E. (2019). Climate, ecology, and the spread of herding in eastern Africa. Quaternary Science Reviews, 204, 119-132.
L. Victoria	Luanda			8200 - 8600 BP	Syncerus caffer	1.93	-0.14	Grazer		Chritz, K. L., Cerling, T. E., Freeman, K. H., Hildebrand, E. A., Janzen, A., & Prendergast, M. E. (2019). Climate, ecology, and the spread of herding in eastern Africa. Quaternary Science Reviews, 204, 119-132.
L. Victoria	Luanda			8200 - 8600 BP	Syncerus caffer	2.1	-0.86	Grazer		Chritz, K. L., Cerling, T. E., Freeman, K. H., Hildebrand, E. A., Janzen, A., & Prendergast, M. E. (2019). Climate, ecology, and the spread of herding in eastern Africa. Quaternary Science Reviews, 204, 119-132.
L. Victoria	Luanda			8200 - 8600 BP	Syncerus caffer	2.3	-2.05	Grazer		Chritz, K. L., Cerling, T. E., Freeman, K. H., Hildebrand, E. A., Janzen, A., & Prendergast, M. E. (2019). Climate, ecology, and the spread of herding in eastern Africa. Quaternary Science Reviews, 204, 119-132.
L. Victoria	Luanda			8200 - 8600 BP	Syncerus caffer	2.91	-1.27	Grazer		Chritz, K. L., Cerling, T. E., Freeman, K. H., Hildebrand, E. A., Janzen, A., & Prendergast, M. E. (2019). Climate, ecology, and the spread of herding in eastern Africa. Quaternary Science Reviews, 204, 119-132.
L. Victoria	Luanda			8200 - 8600 BP	Syncerus caffer	2.98	-2.5	Grazer		Chritz, K. L., Cerling, T. E., Freeman, K. H., Hildebrand, E. A., Janzen, A., & Prendergast, M. E. (2019). Climate, ecology, and the spread of herding in eastern Africa. Quaternary Science Reviews, 204, 119-132.
L. Victoria	Luanda			8200 - 8600 BP	Syncerus caffer	3.09	-2.33	Grazer		Chritz, K. L., Cerling, T. E., Freeman, K. H., Hildebrand, E. A., Janzen, A., & Prendergast, M. E. (2019). Climate, ecology, and the spread of herding in eastern Africa. Quaternary Science Reviews, 204, 119-132.
L. Victoria	Luanda			8200 - 8600 BP	Syncerus caffer	3.18	-2.83	Grazer		Chritz, K. L., Cerling, T. E., Freeman, K. H., Hildebrand, E. A., Janzen, A., & Prendergast, M. E. (2019). Climate, ecology, and the spread of herding in eastern Africa. Quaternary Science Reviews, 204, 119-132.
L. Victoria	Luanda			8200 - 8600 BP	Syncerus caffer	3.66	-1.64	Grazer		Chritz, K. L., Cerling, T. E., Freeman, K. H., Hildebrand, E. A., Janzen, A., & Prendergast, M. E. (2019). Climate, ecology, and the spread of herding in eastern Africa. Quaternary Science Reviews, 204, 119-132.
L. Victoria	Luanda			8200 - 8600 BP	Syncerus caffer	3.67	-3.24	Grazer		Chritz, K. L., Cerling, T. E., Freeman, K. H., Hildebrand, E. A., Janzen, A., & Prendergast, M. E. (2019). Climate, ecology, and the spread of herding in eastern Africa. Quaternary Science Reviews, 204, 119-132.
L. Victoria	Luanda			8200 - 8600 BP	Syncerus caffer	3.82	-1.91	Grazer		Chritz, K. L., Cerling, T. E., Freeman, K. H., Hildebrand, E. A., Janzen, A., & Prendergast, M. E. (2019). Climate, ecology, and the spread of herding in eastern Africa. Quaternary Science Reviews, 204, 119-132.
L. Victoria	Wadh Lang'o			1100 - 1500 BP	Alcelaphine	3	5.21	Grazer		Chritz, K. L., Cerling, T. E., Freeman, K. H., Hildebrand, E. A., Janzen, A., & Prendergast, M. E. (2019). Climate, ecology, and the spread of herding in eastern Africa. Quaternary Science Reviews, 204, 119-132.
L. Victoria	Wadh Lang'o			1100 - 1500 BP	Alcelaphine	0.03	4.01	Grazer		Chritz, K. L., Cerling, T. E., Freeman, K. H., Hildebrand, E. A., Janzen, A., & Prendergast, M. E. (2019). Climate, ecology, and the spread of herding in eastern Africa. Quaternary Science Reviews, 204, 119-132.
L. Victoria	Wadh Lang'o			1100 - 1500 BP	Alcelaphine	1.79	1.25	Grazer		Chritz, K. L., Cerling, T. E., Freeman, K. H., Hildebrand, E. A., Janzen, A., & Prendergast, M. E. (2019). Climate, ecology, and the spread of herding in eastern Africa. Quaternary Science Reviews, 204, 119-132.
L. Victoria	Wadh Lang'o			1100 - 1500 BP	Alcelaphine	2.22	2.83	Grazer		Chritz, K. L., Cerling, T. E., Freeman, K. H., Hildebrand, E. A., Janzen, A., & Prendergast, M. E. (2019). Climate, ecology, and the spread of herding in eastern Africa. Quaternary Science Reviews, 204, 119-132.
L. Victoria	Wadh Lang'o			1100 - 1500 BP	Alcelaphine	2.7	4.1	Grazer		Chritz, K. L., Cerling, T. E., Freeman, K. H., Hildebrand, E. A., Janzen, A., & Prendergast, M. E. (2019). Climate, ecology, and the spread of herding in eastern Africa. Quaternary Science Reviews, 204, 119-132.
L. Victoria	Wadh Lang'o			1100 - 1500 BP	Alcelaphine	2.95	3.61	Grazer		Chritz, K. L., Cerling, T. E., Freeman, K. H., Hildebrand, E. A., Janzen, A., & Prendergast, M. E. (2019). Climate, ecology, and the spread of herding in eastern Africa. Quaternary Science Reviews, 204, 119-132.
L. Victoria	Wadh Lang'o			1100 - 1500 BP	Bovid	-2.31	2.13	Grazer		Chritz, K. L., Cerling, T. E., Freeman, K. H., Hildebrand, E. A., Janzen, A., & Prendergast, M. E. (2019). Climate, ecology, and the spread of herding in eastern Africa. Quaternary Science Reviews, 204, 119-132.
L. Victoria	Wadh Lang'o			1100 - 1500 BP	Bovid	1.66	-0.5	Grazer		Chritz, K. L., Cerling, T. E., Freeman, K. H., Hildebrand, E. A., Janzen, A., & Prendergast, M. E. (2019). Climate, ecology, and the spread of herding in eastern Africa. Quaternary Science Reviews, 204, 119-132.
L. Victoria	Wadh Lang'o			1100 - 1500 BP	Bovid	0.29	3.06	Grazer		Chritz, K. L., Cerling, T. E., Freeman, K. H., Hildebrand, E. A., Janzen, A., & Prendergast, M. E. (2019). Climate, ecology, and the spread of herding in eastern Africa. Quaternary Science Reviews, 204, 119-132.
L. Victoria	Wadh Lang'o			1100 - 1500 BP	Bovid	1.98	2.45	Grazer		Chritz, K. L., Cerling, T. E., Freeman, K. H., Hildebrand, E. A., Janzen, A., & Prendergast, M. E. (2019). Climate, ecology, and the spread of herding in eastern Africa. Quaternary Science Reviews, 204, 119-132.
L. Victoria	Wadh Lang'o			1100 - 1500 BP	Bovid	2.22	5.71	Grazer		Chritz, K. L., Cerling, T. E., Freeman, K. H., Hildebrand, E. A., Janzen, A., & Prendergast, M. E. (2019). Climate, ecology, and the spread of herding in eastern Africa. Quaternary Science Reviews, 204, 119-132.
L. Victoria	Wadh Lang'o			1100 - 1500 BP	Bovid	-0.69	2.21	Grazer		Chritz, K. L., Cerling, T. E., Freeman, K. H., Hildebrand, E. A., Janzen, A., & Prendergast, M. E. (2019). Climate, ecology, and the spread of herding in eastern Africa. Quaternary Science Reviews, 204, 119-132.
L. Victoria	Wadh Lang'o			1100 - 1500 BP	Caprini	1.56	4.08	Grazer		Chritz, K. L., Cerling, T. E., Freeman, K. H., Hildebrand, E. A., Janzen, A., & Prendergast, M. E. (2019). Climate, ecology, and the spread of herding in eastern Africa. Quaternary Science Reviews, 204, 119-132.
L. Victoria	Wadh Lang'o			1100 - 1500 BP	Caprini	3.13	4.66	Grazer		Chritz, K. L., Cerling, T. E., Freeman, K. H., Hildebrand, E. A., Janzen, A., & Prendergast, M. E. (2019). Climate, ecology, and the spread of herding in eastern Africa. Quaternary Science Reviews, 204, 119-132.
L. Victoria	Wadh Lang'o			1100 - 1500 BP	Caprini	-1.43	0.05	Grazer		Chritz, K. L., Cerling, T. E., Freeman, K. H., Hildebrand, E. A., Janzen, A., & Prendergast, M. E. (2019). Climate, ecology, and the spread of herding in eastern Africa. Quaternary Science Reviews, 204, 119-132.
L. Victoria	Wadh Lang'o			1100 - 1500 BP	Caprini	-0.49	4.27	Grazer		Chritz, K. L., Cerling, T. E., Freeman, K. H., Hildebrand, E. A., Janzen, A., & Prendergast, M. E. (2019). Climate, ecology, and the spread of herding in eastern Africa. Quaternary Science Reviews, 204, 119-132.
L. Victoria	Wadh Lang'o			1100 - 1500 BP	Caprini	-0.28	1.71	Grazer		Chritz, K. L., Cerling, T. E., Freeman, K. H., Hildebrand, E. A., Janzen, A., & Prendergast, M. E. (2019). Climate, ecology, and the spread of herding in eastern Africa. Quaternary Science Reviews, 204, 119-132.
L. Victoria	Wadh Lang'o			1100 - 1500 BP	Caprini	-0.19	1.98	Grazer		Chritz, K. L., Cerling, T. E., Freeman, K. H., Hildebrand, E. A., Janzen, A., & Prendergast, M. E. (2019). Climate, ecology, and the spread of herding in eastern Africa. Quaternary Science Reviews, 204, 119-132.
L. Victoria	Wadh Lang'o			1100 - 1500 BP	Caprini	1.11	2.6	Grazer		Chritz, K. L., Cerling, T. E., Freeman, K. H., Hildebrand, E. A., Janzen, A., & Prendergast, M. E. (2019). Climate, ecology, and the spread of herding in eastern Africa. Quaternary Science Reviews, 204, 119-132.
L. Victoria	Wadh Lang'o			1100 - 1500 BP	Caprini	1.67	3.94	Grazer		Chritz, K. L., Cerling, T. E., Freeman, K. H., Hildebrand, E. A., Janzen, A., & Prendergast, M. E. (2019). Climate, ecology, and the spread of herding in eastern Africa. Quaternary Science Reviews, 204, 119-132.
L. Victoria	Wadh Lang'o			1100 - 1500 BP	Caprini	2.05	4.06	Grazer		Chritz, K. L., Cerling, T. E., Freeman, K. H., Hildebrand, E. A., Janzen, A., & Prendergast, M. E. (2019). Climate, ecology, and the spread of herding in eastern Africa. Quaternary Science Reviews, 204, 119-132.
L. Victoria	Wadh Lang'o			1100 - 1500 BP	Caprini	2.21	-2.43	Grazer		Chritz, K. L., Cerling, T. E., Freeman, K. H., Hildebrand, E. A., Janzen, A., & Prendergast, M. E. (2019). Climate, ecology, and the spread of herding in eastern Africa. Quaternary Science Reviews, 204, 119-132.
L. Victoria	Wadh Lang'o			1100 - 1500 BP	Caprini	2.24	-0.27	Grazer		Chritz, K. L., Cerling, T. E., Freeman, K. H., Hildebrand, E. A., Janzen, A., & Prendergast, M. E. (2019). Climate, ecology, and the spread of herding in eastern Africa. Quaternary Science Reviews, 204, 119-132.
L. Victoria	Wadh Lang'o			1100 - 1500 BP	Caprini	2.75	5.44	Grazer		Chritz, K. L., Cerling, T. E., Freeman, K. H., Hildebrand, E. A., Janzen, A., & Prendergast, M. E. (2019). Climate, ecology, and the spread of herding in eastern Africa. Quaternary Science Reviews, 204, 119-132.
L. Victoria	Wadh Lang'o			1100 - 1500 BP	Caprini	4.01	5.01	Grazer		Chritz, K. L., Cerling, T. E., Freeman, K. H., Hildebrand, E. A., Janzen, A., & Prendergast, M. E. (2019). Climate, ecology, and the spread of herding in eastern Africa. Quaternary Science Reviews, 204, 119-132.
L. Victoria	Wadh Lang'o			1100 - 1500 BP	Redunca redunca	-3.25	-1.62	Grazer		Chritz, K. L., Cerling, T. E., Freeman, K. H., Hildebrand, E. A., Janzen, A., & Prendergast, M. E. (2019). Climate, ecology, and the spread of herding in eastern Africa. Quaternary Science Reviews, 204, 119-132.
L. Victoria	Wadh Lang'o			1100 - 1500 BP	Redunca redunca	-0.69	1.74	Grazer		Chritz, K. L., Cerling, T. E., Freeman, K. H., Hildebrand, E. A., Janzen, A., & Prendergast, M. E. (2019). Climate, ecology, and the spread of herding in eastern Africa. Quaternary Science Reviews, 204, 119-132.
L. Victoria	Wadh Lang'o			1100 - 1500 BP	Redunca redunca	2.58	0.73	Grazer		Chritz, K. L., Cerling, T. E., Freeman, K. H., Hildebrand, E. A., Janzen, A., & Prendergast, M. E. (2019). Climate, ecology, and the spread of herding in eastern Africa. Quaternary Science Reviews, 204, 119-132.
L. Victoria	Wadh Lang'o			1100 - 1500 BP	Redunca redunca	2.52	0.4	Grazer		Chritz, K. L., Cerling, T. E., Freeman, K. H., Hildebrand, E. A., Janzen, A., & Prendergast, M. E. (2019). Climate, ecology, and the spread of herding in eastern Africa. Quaternary Science Reviews, 204, 119-132.
L. Victoria	Wadh Lang'o			1100 - 1500 BP	Bos taurus	1.83	3.64	Grazer		Chritz, K. L., Cerling, T. E., Freeman, K. H., Hildebrand, E. A., Janzen, A., & Prendergast, M. E. (2019). Climate, ecology, and the spread of herding in eastern Africa. Quaternary Science Reviews, 204, 119-132.
L. Victoria	Wadh Lang'o			1100 - 1500 BP	Bovid	-0.55	4.65	Grazer		Chritz, K. L., Cerling, T. E., Freeman, K. H., Hildebrand, E. A., Janzen, A., & Prendergast, M. E. (2019). Climate, ecology, and the spread of herding in eastern Africa. Quaternary Science Reviews, 204, 119-132.
L. Victoria	Wadh Lang'o			1100 - 1500 BP	Caprini	0.1	1.56	Grazer		Chritz, K. L., Cerling, T. E., Freeman, K. H., Hildebrand, E. A., Janzen, A., & Prendergast, M. E. (2019). Climate, ecology, and the spread of herding in eastern Africa. Quaternary Science Reviews, 204, 119-132.
L. Victoria	Wadh Lang'o			1100 - 1500 BP	Caprini	2.73	1.08	Grazer		Chritz, K. L., Cerling, T. E., Freeman, K. H., Hildebrand, E. A., Janzen, A., & Prendergast, M. E. (2019). Climate, ecology, and the spread of herding in eastern Africa. Quaternary Science Reviews, 204, 119-132.
L. Victoria	Wadh Lang'o			1100 - 1500 BP	Caprini	-0.69	2.06	Grazer		Chritz, K. L., Cerling, T. E., Freeman, K. H., Hildebrand, E. A., Janzen, A., & Prendergast, M. E. (2019). Climate, ecology, and the spread of herding in eastern Africa. Quaternary Science Reviews, 204, 119-132.
L. Victoria	Wadh Lang'o			1100 - 1500 BP	Caprini	-0.11	0.05	Grazer		Chritz, K. L., Cerling, T. E., Freeman, K. H., Hildebrand, E. A., Janzen, A., & Prendergast, M. E. (2019). Climate, ecology, and the spread of herding in eastern Africa. Quaternary Science Reviews, 204, 119-132.
L. Victoria	Wadh Lang'o			1100 - 1500 BP	Caprini	1.96	3.71	Grazer		Chritz, K. L., Cerling, T. E., Freeman, K. H., Hildebrand, E. A., Janzen, A., & Prendergast, M. E. (2019). Climate, ecology, and the spread of herding in eastern Africa. Quaternary Science Reviews, 204, 119-132.
L. Victoria	Wadh Lang'o			1100 - 1500 BP	Caprini	-2.15	4.18	Grazer		Chritz, K. L., Cerling, T. E., Freeman, K. H., Hildebrand, E. A., Janzen, A., & Prendergast, M. E. (2019). Climate, ecology, and the spread of herding in eastern Africa. Quaternary Science Reviews, 204, 119-132.
L. Victoria	Wadh Lang'o			1100 - 1500 BP	Bovid	2.21	-2.43	Grazer		Chritz, K. L., Cerling, T. E., Freeman, K. H., Hildebrand, E. A., Janzen, A., & Prendergast, M. E. (2019). Climate, ecology, and the spread of herding in eastern Africa. Quaternary Science Reviews, 204, 119-132.
L. Victoria	Wadh Lang'o			1100 - 1500 BP	Connochaetus taurinus	2.78	1.93	Grazer		Chritz, K. L., Cerling, T. E., Freeman, K. H., Hildebrand, E. A., Janzen, A., & Prendergast, M. E. (2019). Climate, ecology, and the spread of herding in eastern Africa. Quaternary Science Reviews, 204, 119-132.
L. Victoria	Wadh Lang'o			1100 - 1500 BP	Phacochoerus sp.	0.39	-0.12	Grazer		Chritz, K. L., Cerling, T. E., Freeman, K. H., Hildebrand, E. A., Janzen, A., & Prendergast, M. E. (2019). Climate, ecology, and the spread of herding in eastern Africa. Quaternary Science Reviews, 204, 119-132.
L. Victoria	Wadh Lang'o			1100 - 1500 BP	Kobus ellipsiprymnus	1.37	2.61	Grazer		Chritz, K. L., Cerling, T. E., Freeman, K. H., Hildebrand, E. A., Janzen, A., & Prendergast, M. E. (2019). Climate, ecology, and the spread of herding in eastern Africa. Quaternary Science Reviews, 204, 119-132.
Porc Epic	Porc Epic			100000 - 40000 BP	Aepyceros melampus	-3	-0.3	Mixed Feeder		Robinson, J. R. (2017). Thinking locally: environmental reconstruction of Middle and Later Stone Age archaeological sites in Ethiopia, Kenya, and Zambia based on ungulate stable isotopes. J Hum Evol, 106, 19-37. doi:10.1016/j.jhevol.2017.01.013
Porc Epic	Porc Epic			100000 - 40000 BP	Aepyceros melampus	-1.9	1.5	Mixed Feeder		Robinson, J. R. (2017). Thinking locally: environmental reconstruction of Middle and Later Stone Age archaeological sites in Ethiopia, Kenya, and Zambia based on ungulate stable isotopes. J Hum Evol, 106, 19-37. doi:10.1016/j.jhevol.2017.01.014
Porc Epic	Porc Epic			100000 - 40000 BP	Aepyceros melampus	-5	5	Mixed Feeder		Robinson, J. R. (2017). Thinking locally: environmental reconstruction of Middle and Later Stone Age archaeological sites in Ethiopia, Kenya, and Zambia based on ungulate stable isotopes. J Hum Evol, 106, 19-37. doi:10.1016/j.jhevol.2017.01.015
Porc Epic	Porc Epic			100000 - 40000 BP	Nanger granti	-2.9	2.9	Mixed Feeder		Robinson, J. R. (2017). Thinking locally: environmental reconstruction of Middle and Later Stone Age archaeological sites in Ethiopia, Kenya, and Zambia based on ungulate stable isotopes. J Hum Evol, 106, 19-37. doi:10.1016/j.jhevol.2017.01.016
Porc Epic	Porc Epic			100000 - 40000 BP	Nanger sp.	-4.6	3.5	Mixed Feeder		Robinson, J. R. (2017). Thinking locally: environmental reconstruction of Middle and Later Stone Age archaeological sites in Ethiopia, Kenya, and Zambia based on ungulate stable isotopes. J Hum Evol, 106, 19-37. doi:10.1016/j.jhevol.2017.01.017
Porc Epic	Porc Epic			100000 - 40000 BP	Madoqua guentheri	-8.3	6.8	Browser		Robinson, J. R. (2017). Thinking locally: environmental reconstruction of Middle and Later Stone Age archaeological sites in Ethiopia, Kenya, and Zambia based on ungulate stable isotopes. J Hum Evol, 106, 19-37. doi:10.1016/j.jhevol.2017.01.018
Porc Epic	Porc Epic			100000 - 40000 BP	Damaliscus lunatus	1	3.3	Grazer		Robinson, J. R. (2017). Thinking locally: environmental reconstruction of Middle and Later Stone Age archaeological sites in Ethiopia, Kenya, and Zambia based on ungulate stable isotopes. J Hum Evol, 106, 19-37. doi:10.1016/j.jhevol.2017.01.019
Porc Epic	Porc Epic			100000 - 40000 BP	Damaliscus lunatus	-2.1	1.6	Grazer		Robinson, J. R. (2017). Thinking locally: environmental reconstruction of Middle and Later Stone Age archaeological sites in Ethiopia, Kenya, and Zambia based on ungulate stable isotopes. J Hum Evol, 106, 19-37. doi:10.1016/j.jhevol.2017.01.020
Porc Epic	Porc Epic			100000 - 40000 BP	Damaliscus lunatus	1	0.1	Grazer		Robinson, J. R. (2017). Thinking locally: environmental reconstruction of Middle and Later Stone Age archaeological sites in Ethiopia, Kenya, and Zambia based on ungulate stable isotopes. J Hum Evol, 106, 19-37. doi:10.1016/j.jhevol.2017.01.021
Porc Epic	Porc Epic			100000 - 40000 BP	Syncerus sp. antiquus	-4.6	4	Mixed Feeder		Robinson, J. R. (2017). Thinking locally: environmental reconstruction of Middle and Later Stone Age archaeological sites in Ethiopia, Kenya, and Zambia based on ungulate stable isotopes. J Hum Evol, 106, 19-37. doi:10.1016/j.jhevol.2017.01.022
Porc Epic	Porc Epic			100000 - 40000 BP	Syncerus sp. antiquus	-7.4	7	Mixed Feeder		Robinson, J. R. (2017). Thinking locally: environmental reconstruction of Middle and Later Stone Age archaeological sites in Ethiopia, Kenya, and Zambia based on ungulate stable isotopes. J Hum Evol, 106, 19-37. doi:10.1016/j.jhevol.2017.01.023
Porc Epic	Porc Epic			100000 - 40000 BP	Syncerus sp. antiquus	-6.3	4.6	Mixed Feeder		Robinson, J. R. (2017). Thinking locally: environmental reconstruction of Middle and Later Stone Age archaeological sites in Ethiopia, Kenya, and Zambia based on ungulate stable isotopes. J Hum Evol, 106, 19-37. doi:10.1016/j.jhevol.2017.01.024
Porc Epic	Porc Epic			100000 - 40000 BP	Syncerus sp. antiquus	-6.4	3.9	Mixed Feeder		Robinson, J. R. (2017). Thinking locally: environmental reconstruction of Middle and Later Stone Age archaeological sites in Ethiopia, Kenya, and Zambia based on ungulate stable isotopes. J Hum Evol, 106, 19-37. doi:10.1016/j.jhevol.2017.01.025
Porc Epic	Porc Epic			100000 - 40000 BP	Syncerus sp. antiquus	-7.6	-2	Mixed Feeder		Robinson, J. R. (2017). Thinking locally: environmental reconstruction of Middle and Later Stone Age archaeological sites in Ethiopia, Kenya, and Zambia based on ungulate stable isotopes. J Hum Evol, 106, 19-37. doi:10.1016/j.jhevol.2017.01.026
Porc Epic	Porc Epic			100000 - 40000 BP	Syncerus caffer	-5.6	0.8	Grazer		Robinson, J. R. (2017). Thinking locally: environmental reconstruction of Middle and Later Stone Age archaeological sites in Ethiopia, Kenya, and Zambia based on ungulate stable isotopes. J Hum Evol, 106, 19-37. doi:10.1016/j.jhevol.2017.01.027
Porc Epic	Porc Epic			100000 - 40000 BP	Syncerus caffer	-5.8	3.5	Grazer		Robinson, J. R. (2017). Thinking locally: environmental reconstruction of Middle and Later Stone Age archaeological sites in Ethiopia, Kenya, and Zambia based on ungulate stable isotopes. J Hum Evol, 106, 19-37. doi:10.1016/j.jhevol.2017.01.028
Porc Epic	Porc Epic			100000 - 40000 BP	Syncerus caffer	0.5	1.6	Grazer		Robinson, J. R. (2017). Thinking locally: environmental reconstruction of Middle and Later Stone Age archaeological sites in Ethiopia, Kenya, and Zambia based on ungulate stable isotopes. J Hum Evol, 106, 19-37. doi:10.1016/j.jhevol.2017.01.029
Porc Epic	Porc Epic			100000 - 40000 BP	Syncerus caffer	1.6	2.1	Grazer		Robinson, J. R. (2017). Thinking locally: environmental reconstruction of Middle and Later Stone Age archaeological sites in Ethiopia, Kenya, and Zambia based on ungulate stable isotopes. J Hum Evol, 106, 19-37. doi:10.1016/j.jhevol.2017.01.030
Porc Epic	Porc Epic			100000 - 40000 BP	Syncerus caffer	2	-2.7	Grazer		Robinson, J. R. (2017). Thinking locally: environmental reconstruction of Middle and Later Stone Age archaeological sites in Ethiopia, Kenya, and Zambia based on ungulate stable isotopes. J Hum Evol, 106, 19-37. doi:10.1016/j.jhevol.2017.01.031
Porc Epic	Porc Epic			100000 - 40000 BP	Syncerus caffer	-0.5	0.7	Grazer		Robinson, J. R. (2017). Thinking locally: environmental reconstruction of Middle and Later Stone Age archaeological sites in Ethiopia, Kenya, and Zambia based on ungulate stable isotopes. J Hum Evol, 106, 19-37. doi:10.1016/j.jhevol.2017.01.032
Porc Epic	Porc Epic			100000 - 40000 BP	Syncerus caffer	1.5	-1.5	Grazer		Robinson, J. R. (2017). Thinking locally: environmental reconstruction of Middle and Later Stone Age archaeological sites in Ethiopia, Kenya, and Zambia based on ungulate stable isotopes. J Hum Evol, 106, 19-37. doi:10.1016/j.jhevol.2017.01.033
Porc Epic	Porc Epic			100000 - 40000 BP	Syncerus caffer	-1.6	-0.2	Grazer		Robinson, J. R. (2017). Thinking locally: environmental reconstruction of Middle and Later Stone Age archaeological sites in Ethiopia, Kenya, and Zambia based on ungulate stable isotopes. J Hum Evol, 106, 19-37. doi:10.1016/j.jhevol.2017.01.034
Porc Epic	Porc Epic			100000 - 40000 BP	Syncerus caffer	1.4	2.4	Grazer		Robinson, J. R. (2017). Thinking locally: environmental reconstruction of Middle and Later Stone Age archaeological sites in Ethiopia, Kenya, and Zambia based on ungulate stable isotopes. J Hum Evol, 106, 19-37. doi:10.1016/j.jhevol.2017.01.035
Porc Epic	Porc Epic			100000 - 40000 BP	Oryx beisa	-1	-0.9	Grazer		Robinson, J. R. (2017). Thinking locally: environmental reconstruction of Middle and Later Stone Age archaeological sites in Ethiopia, Kenya, and Zambia based on ungulate stable isotopes. J Hum Evol, 106, 19-37. doi:10.1016/j.jhevol.2017.01.036
Porc Epic	Porc Epic			100000 - 40000 BP	Neotragus spp.	-10	4.6	Browser		Robinson, J. R. (2017). Thinking locally: environmental reconstruction of Middle and Later Stone Age archaeological sites in Ethiopia, Kenya, and Zambia based on ungulate stable isotopes. J Hum Evol, 106, 19-37. doi:10.1016/j.jhevol.2017.01.037
Porc Epic	Porc Epic			100000 - 40000 BP	Raphicerus sp.	-10.1	7.4	Browser		Robinson, J. R. (2017). Thinking locally: environmental reconstruction of Middle and Later Stone Age archaeological sites in Ethiopia, Kenya, and Zambia based on ungulate stable isotopes. J Hum Evol, 106, 19-37. doi:10.1016/j.jhevol.2017.01.038
Porc Epic	Porc Epic			100000 - 40000 BP	Kobus ellipsiprymnus	-3	2.4	Grazer		Robinson, J. R. (2017). Thinking locally: environmental reconstruction of Middle and Later Stone Age archaeological sites in Ethiopia, Kenya, and Zambia based on ungulate stable isotopes. J Hum Evol, 106, 19-37. doi:10.1016/j.jhevol.2017.01.039
Porc Epic	Porc Epic			100000 - 40000 BP	Kobus ellipsiprymnus	0.1	-3.7	Grazer		Robinson, J. R. (2017). Thinking locally: environmental reconstruction of Middle and Later Stone Age archaeological sites in Ethiopia, Kenya, and Zambia based on ungulate stable isotopes. J Hum Evol, 106, 19-37. doi:10.1016/j.jhevol.2017.01.040
Porc Epic	Porc Epic			100000 - 40000 BP	Kobus spp.	-2.3	2.8	Grazer		Robinson, J. R. (2017). Thinking locally: environmental reconstruction of Middle and Later Stone Age archaeological sites in Ethiopia, Kenya, and Zambia based on ungulate stable isotopes. J Hum Evol, 106, 19-37. doi:10.1016/j.jhevol.2017.01.041
Porc Epic	Porc Epic			100000 - 40000 BP	Redunca redunca	-4.1	1.6	Grazer		Robinson, J. R. (2017). Thinking locally: environmental reconstruction of Middle and Later Stone Age archaeological sites in Ethiopia, Kenya, and Zambia based on ungulate stable isotopes. J Hum Evol, 106, 19-37. doi:10.1016/j.jhevol.2017.01.042
Porc Epic	Porc Epic			100000 - 40000 BP	Redunca redunca	-0.9	-0.2	Grazer		Robinson, J. R. (2017). Thinking locally: environmental reconstruction of Middle and Later Stone Age archaeological sites in Ethiopia, Kenya, and Zambia based on ungulate stable isotopes. J Hum Evol, 106, 19-37. doi:10.1016/j.jhevol.2017.01.043
Porc Epic	Porc Epic			100000 - 40000 BP	Redunca sp. redunca	-4.4	1.1	Grazer		Robinson, J. R. (2017). Thinking locally: environmental reconstruction of Middle and Later Stone Age archaeological sites in Ethiopia, Kenya, and Zambia based on ungulate stable isotopes. J Hum Evol, 106, 19-37. doi:10.1016/j.jhevol.2017.01.044
Porc Epic	Porc Epic			100000 - 40000 BP	Redunca sp. redunca	0	-1.2	Grazer		Robinson, J. R. (2017). Thinking locally: environmental reconstruction of Middle and Later Stone Age archaeological sites in Ethiopia, Kenya, and Zambia based on ungulate stable isotopes. J Hum Evol, 106, 19-37. doi:10.1016/j.jhevol.2017.01.045
Porc Epic	Porc Epic			100000 - 40000 BP	Redunca spp.	0.4	1.5	Grazer		Robinson, J. R. (2017). Thinking locally: environmental reconstruction of Middle and Later Stone Age archaeological sites in Ethiopia, Kenya, and Zambia based on ungulate stable isotopes. J Hum Evol, 106, 19-37. doi:10.1016/j.jhevol.2017.01.046
Porc Epic	Porc Epic			100000 - 40000 BP	Tragelaphus strepsiceros	-5.7	2.3	Mixed Feeder		Robinson, J. R. (2017). Thinking locally: environmental reconstruction of Middle and Later Stone Age archaeological sites in Ethiopia, Kenya, and Zambia based on ungulate stable isotopes. J Hum Evol, 106, 19-37. doi:10.1016/j.jhevol.2017.01.047
Porc Epic	Porc Epic			100000 - 40000 BP	Tragelaphus strepsiceros	-5.9	2.6	Mixed Feeder		Robinson, J. R. (2017). Thinking locally: environmental reconstruction of Middle and Later Stone Age archaeological sites in Ethiopia, Kenya, and Zambia based on ungulate stable isotopes. J Hum Evol, 106, 19-37. doi:10.1016/j.jhevol.2017.01.048
Porc Epic	Porc Epic			100000 - 40000 BP	Tragelaphus strepsiceros	-8.5	4.6	Mixed Feeder		Robinson, J. R. (2017). Thinking locally: environmental reconstruction of Middle and Later Stone Age archaeological sites in Ethiopia, Kenya, and Zambia based on ungulate stable isotopes. J Hum Evol, 106, 19-37. doi:10.1016/j.jhevol.2017.01.049
Porc Epic	Porc Epic			100000 - 40000 BP	Tragelaphus strepsiceros	-8.9	5.2	Mixed Feeder		Robinson, J. R. (2017). Thinking locally: environmental reconstruction of Middle and Later Stone Age archaeological sites in Ethiopia, Kenya, and Zambia based on ungulate stable isotopes. J Hum Evol, 106, 19-37. doi:10.1016/j.jhevol.2017.01.050
Porc Epic	Porc Epic			100000 - 40000 BP	Tragelaphus strepsiceros	-6.8	3.5	Mixed Feeder		Robinson, J. R. (2017). Thinking locally: environmental reconstruction of Middle and Later Stone Age archaeological sites in Ethiopia, Kenya, and Zambia based on ungulate stable isotopes. J Hum Evol, 106, 19-37. doi:10.1016/j.jhevol.2017.01.051
Porc Epic	Porc Epic			100000 - 40000 BP	Tragelaphus spp.	-8.7	-0.4	Browser		Robinson, J. R. (2017). Thinking locally: environmental reconstruction of Middle and Later Stone Age archaeological sites in Ethiopia, Kenya, and Zambia based on ungulate stable isotopes. J Hum Evol, 106, 19-37. doi:10.1016/j.jhevol.2017.01.052
Porc Epic	Porc Epic			100000 - 40000 BP	Tragelaphus spp.	-1.1	0.6	Browser		Robinson, J. R. (2017). Thinking locally: environmental reconstruction of Middle and Later Stone Age archaeological sites in Ethiopia, Kenya, and Zambia based on ungulate stable isotopes. J Hum Evol, 106, 19-37. doi:10.1016/j.jhevol.2017.01.053
Porc Epic	Porc Epic			100000 - 40000 BP	Phacochoerus africanus	-1.9	2.3	Grazer		Robinson, J. R. (2017). Thinking locally: environmental reconstruction of Middle and Later Stone Age archaeological sites in Ethiopia, Kenya, and Zambia based on ungulate stable isotopes. J Hum Evol, 106, 19-37. doi:10.1016/j.jhevol.2017.01.054
Porc Epic	Porc Epic			100000 - 40000 BP	Phacochoerus africanus	-3.2	1.7	Grazer		Robinson, J. R. (2017). Thinking locally: environmental reconstruction of Middle and Later Stone Age archaeological sites in Ethiopia, Kenya, and Zambia based on ungulate stable isotopes. J Hum Evol, 106, 19-37. doi:10.1016/j.jhevol.2017.01.055
Porc Epic	Porc Epic			100000 - 40000 BP	Phacochoerus africanus	-8.5	6	Grazer		Robinson, J. R. (2017). Thinking locally: environmental reconstruction of Middle and Later Stone Age archaeological sites in Ethiopia, Kenya, and Zambia based on ungulate stable isotopes. J Hum Evol, 106, 19-37. doi:10.1016/j.jhevol.2017.01.056
Porc Epic	Porc Epic			100000 - 40000 BP	Phacochoerus africanus	-1.5	3	Grazer		Robinson, J. R. (2017). Thinking locally: environmental reconstruction of Middle and Later Stone Age archaeological sites in Ethiopia, Kenya, and Zambia based on ungulate stable isotopes. J Hum Evol, 106, 19-37. doi:10.1016/j.jhevol.2017.01.057
Porc Epic	Porc Epic			100000 - 40000 BP	Phacochoerus africanus	-3.8	2.9	Grazer		Robinson, J. R. (2017). Thinking locally: environmental reconstruction of Middle and Later Stone Age archaeological sites in Ethiopia, Kenya, and Zambia based on ungulate stable isotopes. J Hum Evol, 106, 19-37. doi:10.1016/j.jhevol.2017.01.058
Porc Epic	Porc Epic			100000 - 40000 BP	Phacochoerus africanus	-1.7	-1.6	Grazer		Robinson, J. R. (2017). Thinking locally: environmental reconstruction of Middle and Later Stone Age archaeological sites in Ethiopia, Kenya, and Zambia based on ungulate stable isotopes. J Hum Evol, 106, 19-37. doi:10.1016/j.jhevol.2017.01.059
Porc Epic	Porc Epic			100000 - 40000 BP	Phacochoerus africanus	-1.3	4.1	Grazer		Robinson, J. R. (2017). Thinking locally: environmental reconstruction of Middle and Later Stone Age archaeological sites in Ethiopia, Kenya, and Zambia based on ungulate stable isotopes. J Hum Evol, 106, 19-37. doi:10.1016/j.jhevol.2017.01.060
Porc Epic	Porc Epic			100000 - 40000 BP	Phacochoerus africanus	-11.2	0.4	Grazer		Robinson, J. R. (2017). Thinking locally: environmental reconstruction of Middle and Later Stone Age archaeological sites in Ethiopia, Kenya, and Zambia based on ungulate stable isotopes. J Hum Evol, 106, 19-37. doi:10.1016/j.jhevol.2017.01.061
Porc Epic	Porc Epic			100000 - 40000 BP	Phacochoerus africanus	-3.2	-0.4	Grazer		Robinson, J. R. (2017). Thinking locally: environmental reconstruction of Middle and Later Stone Age archaeological sites in Ethiopia, Kenya, and Zambia based on ungulate stable isotopes. J Hum Evol, 106, 19-37. doi:10.1016/j.jhevol.2017.01.062
Porc Epic	Porc Epic			100000 - 40000 BP	Phacochoerus africanus	-3.6	0.3	Grazer		Robinson, J. R. (2017). Thinking locally: environmental reconstruction of Middle and Later Stone Age archaeological sites in Ethiopia, Kenya, and Zambia based on ungulate stable isotopes. J Hum Evol, 106, 19-37. doi:10.1016/j.jhevol.2017.01.063
Porc Epic	Porc Epic			100000 - 40000 BP	Phacochoerus africanus	-4.1	0.8	Grazer		Robinson, J. R. (2017). Thinking locally: environmental reconstruction of Middle and Later Stone Age archaeological sites in Ethiopia, Kenya, and Zambia based on ungulate stable isotopes. J Hum Evol, 106, 19-37. doi:10.1016/j.jhevol.2017.01.064
Porc Epic	Porc Epic			100000 - 40000 BP	Phacochoerus africanus	-1.9	0.5	Grazer		Robinson, J. R. (2017). Thinking locally: environmental reconstruction of Middle and Later Stone Age archaeological sites in Ethiopia, Kenya, and Zambia based on ungulate stable isotopes. J Hum Evol, 106, 19-37. doi:10.1016/j.jhevol.2017.01.065
Porc Epic	Porc Epic			100000 - 40000 BP	Phacochoerus africanus	-1.2	-0.3	Grazer		Robinson, J. R. (2017). Thinking locally: environmental reconstruction of Middle and Later Stone Age archaeological sites in Ethiopia, Kenya, and Zambia based on ungulate stable isotopes. J Hum Evol, 106, 19-37. doi:10.1016/j.jhevol.2017.01.066
Porc Epic	Porc Epic			100000 - 40000 BP	Potamochoerus porcus	-5.5	-1.8	Omnivore		Robinson, J. R. (2017). Thinking locally: environmental reconstruction of Middle and Later Stone Age archaeological sites in Ethiopia, Kenya, and Zambia based on ungulate stable isotopes. J Hum Evol, 106, 19-37. doi:10.1016/j.jhevol.2017.01.067
Porc Epic	Porc Epic			100000 - 40000 BP	Equus quagga	-3	3.8	Grazer		Robinson, J. R. (2017). Thinking locally: environmental reconstruction of Middle and Later Stone Age archaeological sites in Ethiopia, Kenya, and Zambia based on ungulate stable isotopes. J Hum Evol, 106, 19-37. doi:10.1016/j.jhevol.2017.01.068
Porc Epic	Porc Epic			100000 - 40000 BP	Equus quagga	-1	2.1	Grazer		Robinson, J. R. (2017). Thinking locally: environmental reconstruction of Middle and Later Stone Age archaeological sites in Ethiopia, Kenya, and Zambia based on ungulate stable isotopes. J Hum Evol, 106, 19-37. doi:10.1016/j.jhevol.2017.01.069
Porc Epic	Porc Epic			100000 - 40000 BP	Equus quagga	-4	0.1	Grazer		Robinson, J. R. (2017). Thinking locally: environmental reconstruction of Middle and Later Stone Age archaeological sites in Ethiopia, Kenya, and Zambia based on ungulate stable isotopes. J Hum Evol, 106, 19-37. doi:10.1016/j.jhevol.2017.01.070
Porc Epic	Porc Epic			100000 - 40000 BP	Equus quagga	-1.9	4	Grazer		Robinson, J. R. (2017). Thinking locally: environmental reconstruction of Middle and Later Stone Age archaeological sites in Ethiopia, Kenya, and Zambia based on ungulate stable isotopes. J Hum Evol, 106, 19-37. doi:10.1016/j.jhevol.2017.01.071
Porc Epic	Porc Epic			100000 - 40000 BP	Equus grevyi	-0.9	1.6	Grazer		Robinson, J. R. (2017). Thinking locally: environmental reconstruction of Middle and Later Stone Age archaeological sites in Ethiopia, Kenya, and Zambia based on ungulate stable isotopes. J Hum Evol, 106, 19-37. doi:10.1016/j.jhevol.2017.01.072
Kalemba Rockshelter	Kalemba Rockshelter			40000 - 8000 BP	Eudorcas thomsonii	-11	-0.8	Mixed Feeder		Robinson, J. R. (2017). Thinking locally: environmental reconstruction of Middle and Later Stone Age archaeological sites in Ethiopia, Kenya, and Zambia based on ungulate stable isotopes. J Hum Evol, 106, 19-37. doi:10.1016/j.jhevol.2017.01.073
Kalemba Rockshelter	Kalemba Rockshelter			40000 - 8000 BP	Connochaetes taurinus	-4.8	-2.2	Grazer		Robinson, J. R. (2017). Thinking locally: environmental reconstruction of Middle and Later Stone Age archaeological sites in Ethiopia, Kenya, and Zambia based on ungulate stable isotopes. J Hum Evol, 106, 19-37. doi:10.1016/j.jhevol.2017.01.074
Kalemba Rockshelter	Kalemba Rockshelter			40000 - 8000 BP	Connochaetes taurinus	1	-0.6	Grazer		Robinson, J. R. (2017). Thinking locally: environmental reconstruction of Middle and Later Stone Age archaeological sites in Ethiopia, Kenya, and Zambia based on ungulate stable isotopes. J Hum Evol, 106, 19-37. doi:10.1016/j.jhevol.2017.01.075
Kalemba Rockshelter	Kalemba Rockshelter			40000 - 8000 BP	Connochaetes taurinus	-0.8	-3.5	Grazer		Robinson, J. R. (2017). Thinking locally: environmental reconstruction of Middle and Later Stone Age archaeological sites in Ethiopia, Kenya, and Zambia based on ungulate stable isotopes. J Hum Evol, 106, 19-37. doi:10.1016/j.jhevol.2017.01.076
Kalemba Rockshelter	Kalemba Rockshelter			40000 - 8000 BP	Connochaetes taurinus	-0.2	-4.4	Grazer		Robinson, J. R. (2017). Thinking locally: environmental reconstruction of Middle and Later Stone Age archaeological sites in Ethiopia, Kenya, and Zambia based on ungulate stable isotopes. J Hum Evol, 106, 19-37. doi:10.1016/j.jhevol.2017.01.077
Kalemba Rockshelter	Kalemba Rockshelter			40000 - 8000 BP	Connochaetes taurinus	0.8	-4.3	Grazer		Robinson, J. R. (2017). Thinking locally: environmental reconstruction of Middle and Later Stone Age archaeological sites in Ethiopia, Kenya, and Zambia based on ungulate stable isotopes. J Hum Evol, 106, 19-37. doi:10.1016/j.jhevol.2017.01.078
Kalemba Rockshelter	Kalemba Rockshelter			40000 - 8000 BP	Connochaetes taurinus	-1.5	-3.4	Grazer		Robinson, J. R. (2017). Thinking locally: environmental reconstruction of Middle and Later Stone Age archaeological sites in Ethiopia, Kenya, and Zambia based on ungulate stable isotopes. J Hum Evol, 106, 19-37. doi:10.1016/j.jhevol.2017.01.079
Kalemba Rockshelter	Kalemba Rockshelter			40000 - 8000 BP	Connochaetes taurinus	-0.8	-3.6	Grazer		Robinson, J. R. (2017). Thinking locally: environmental reconstruction of Middle and Later Stone Age archaeological sites in Ethiopia, Kenya, and Zambia based on ungulate stable isotopes. J Hum Evol, 106, 19-37. doi:10.1016/j.jhevol.2017.01.080
Kalemba Rockshelter	Kalemba Rockshelter			40000 - 8000 BP	Connochaetes taurinus	0.5	-6.5	Grazer		Robinson, J. R. (2017). Thinking locally: environmental reconstruction of Middle and Later Stone Age archaeological sites in Ethiopia, Kenya, and Zambia based on ungulate stable isotopes. J Hum Evol, 106, 19-37. doi:10.1016/j.jhevol.2017.01.081
Kalemba Rockshelter	Kalemba Rockshelter			40000 - 8000 BP	Connochaetes taurinus	-0.7	-4.6	Grazer		Robinson, J. R. (2017). Thinking locally: environmental reconstruction of Middle and Later Stone Age archaeological sites in Ethiopia, Kenya, and Zambia based on ungulate stable isotopes. J Hum Evol, 106, 19-37. doi:10.1016/j.jhevol.2017.01.082
Kalemba Rockshelter	Kalemba Rockshelter			40000 - 8000 BP	Sylvicapra grimmia	-13.8	-6.1	Browser		Robinson, J. R. (2017). Thinking locally: environmental reconstruction of Middle and Later Stone Age archaeological sites in Ethiopia, Kenya, and Zambia based on ungulate stable isotopes. J Hum Evol, 106, 19-37. doi:10.1016/j.jhevol.2017.01.083
Kalemba Rockshelter	Kalemba Rockshelter			40000 - 8000 BP	Sylvicapra grimmia	-11.1	-6.4	Browser		Robinson, J. R. (2017). Thinking locally: environmental reconstruction of Middle and Later Stone Age archaeological sites in Ethiopia, Kenya, and Zambia based on ungulate stable isotopes. J Hum Evol, 106, 19-37. doi:10.1016/j.jhevol.2017.01.084
Kalemba Rockshelter	Kalemba Rockshelter			40000 - 8000 BP	Sylvicapra grimmia	-11.5	-2.4	Browser		Robinson, J. R. (2017). Thinking locally: environmental reconstruction of Middle and Later Stone Age archaeological sites in Ethiopia, Kenya, and Zambia based on ungulate stable isotopes. J Hum Evol, 106, 19-37. doi:10.1016/j.jhevol.2017.01.085
Kalemba Rockshelter	Kalemba Rockshelter			40000 - 8000 BP	Sylvicapra grimmia	-14.9	-3.7	Browser		Robinson, J. R. (2017). Thinking locally: environmental reconstruction of Middle and Later Stone Age archaeological sites in Ethiopia, Kenya, and Zambia based on ungulate stable isotopes. J Hum Evol, 106, 19-37. doi:10.1016/j.jhevol.2017.01.086
Kalemba Rockshelter	Kalemba Rockshelter			40000 - 8000 BP	Sylvicapra grimmia	-10.5	-3.5	Browser		Robinson, J. R. (2017). Thinking locally: environmental reconstruction of Middle and Later Stone Age archaeological sites in Ethiopia, Kenya, and Zambia based on ungulate stable isotopes. J Hum Evol, 106, 19-37. doi:10.1016/j.jhevol.2017.01.087
Kalemba Rockshelter	Kalemba Rockshelter			40000 - 8000 BP	Sylvicapra grimmia	-5.6	-4	Browser		Robinson, J. R. (2017). Thinking locally: environmental reconstruction of Middle and Later Stone Age archaeological sites in Ethiopia, Kenya, and Zambia based on ungulate stable isotopes. J Hum Evol, 106, 19-37. doi:10.1016/j.jhevol.2017.01.088
Kalemba Rockshelter	Kalemba Rockshelter			40000 - 8000 BP	Hippotragus niger	-0.6	-5.2	Grazer		Robinson, J. R. (2017). Thinking locally: environmental reconstruction of Middle and Later Stone Age archaeological sites in Ethiopia, Kenya, and Zambia based on ungulate stable isotopes. J Hum Evol, 106, 19-37. doi:10.1016/j.jhevol.2017.01.089
Kalemba Rockshelter	Kalemba Rockshelter			40000 - 8000 BP	Ourebia ourebi	-10.3	-0.6	Mixed Feeder		Robinson, J. R. (2017). Thinking locally: environmental reconstruction of Middle and Later Stone Age archaeological sites in Ethiopia, Kenya, and Zambia based on ungulate stable isotopes. J Hum Evol, 106, 19-37. doi:10.1016/j.jhevol.2017.01.090
Kalemba Rockshelter	Kalemba Rockshelter			40000 - 8000 BP	Kobus ellipsiprymnus	-8.3	-5.1	Grazer		Robinson, J. R. (2017). Thinking locally: environmental reconstruction of Middle and Later Stone Age archaeological sites in Ethiopia, Kenya, and Zambia based on ungulate stable isotopes. J Hum Evol, 106, 19-37. doi:10.1016/j.jhevol.2017.01.091
Kalemba Rockshelter	Kalemba Rockshelter			40000 - 8000 BP	Kobus ellipsiprymnus	0.5	-2.3	Grazer		Robinson, J. R. (2017). Thinking locally: environmental reconstruction of Middle and Later Stone Age archaeological sites in Ethiopia, Kenya, and Zambia based on ungulate stable isotopes. J Hum Evol, 106, 19-37. doi:10.1016/j.jhevol.2017.01.092
Kalemba Rockshelter	Kalemba Rockshelter			40000 - 8000 BP	Kobus ellipsiprymnus	0.1	-3.4	Grazer		Robinson, J. R. (2017). Thinking locally: environmental reconstruction of Middle and Later Stone Age archaeological sites in Ethiopia, Kenya, and Zambia based on ungulate stable isotopes. J Hum Evol, 106, 19-37. doi:10.1016/j.jhevol.2017.01.093
Kalemba Rockshelter	Kalemba Rockshelter			40000 - 8000 BP	Kobus ellipsiprymnus	1.1	-3.9	Grazer		Robinson, J. R. (2017). Thinking locally: environmental reconstruction of Middle and Later Stone Age archaeological sites in Ethiopia, Kenya, and Zambia based on ungulate stable isotopes. J Hum Evol, 106, 19-37. doi:10.1016/j.jhevol.2017.01.094
Kalemba Rockshelter	Kalemba Rockshelter			40000 - 8000 BP	Kobus ellipsiprymnus	0	-5.8	Grazer		Robinson, J. R. (2017). Thinking locally: environmental reconstruction of Middle and Later Stone Age archaeological sites in Ethiopia, Kenya, and Zambia based on ungulate stable isotopes. J Hum Evol, 106, 19-37. doi:10.1016/j.jhevol.2017.01.095
Kalemba Rockshelter	Kalemba Rockshelter			40000 - 8000 BP	Kobus ellipsiprymnus	0.2	-5.7	Grazer		Robinson, J. R. (2017). Thinking locally: environmental reconstruction of Middle and Later Stone Age archaeological sites in Ethiopia, Kenya, and Zambia based on ungulate stable isotopes. J Hum Evol, 106, 19-37. doi:10.1016/j.jhevol.2017.01.096
Kalemba Rockshelter	Kalemba Rockshelter			40000 - 8000 BP	Kobus ellipsiprymnus	0.4	-5.7	Grazer		Robinson, J. R. (2017). Thinking locally: environmental reconstruction of Middle and Later Stone Age archaeological sites in Ethiopia, Kenya, and Zambia based on ungulate stable isotopes. J Hum Evol, 106, 19-37. doi:10.1016/j.jhevol.2017.01.097
Kalemba Rockshelter	Kalemba Rockshelter			40000 - 8000 BP	Kobus ellipsiprymnus	-3	-5.1	Grazer		Robinson, J. R. (2017). Thinking locally: environmental reconstruction of Middle and Later Stone Age archaeological sites in Ethiopia, Kenya, and Zambia based on ungulate stable isotopes. J Hum Evol, 106, 19-37. doi:10.1016/j.jhevol.2017.01.098
Kalemba Rockshelter	Kalemba Rockshelter			40000 - 8000 BP	Kobus ellipsiprymnus	-0.8	-5.4	Grazer		Robinson, J. R. (2017). Thinking locally: environmental reconstruction of Middle and Later Stone Age archaeological sites in Ethiopia, Kenya, and Zambia based on ungulate stable isotopes. J Hum Evol, 106, 19-37. doi:10.1016/j.jhevol.2017.01.099
Kalemba Rockshelter	Kalemba Rockshelter			40000 - 8000 BP	Kobus ellipsiprymnus	0.3	-3.6	Grazer		Robinson, J. R. (2017). Thinking locally: environmental reconstruction of Middle and Later Stone Age archaeological sites in Ethiopia, Kenya, and Zambia based on ungulate stable isotopes. J Hum Evol, 106, 19-37. doi:10.1016/j.jhevol.2017.01.100
Kalemba Rockshelter	Kalemba Rockshelter			40000 - 8000 BP	Kobus ellipsiprymnus	-0.6	-5.1	Grazer		Robinson, J. R. (2017). Thinking locally: environmental reconstruction of Middle and Later Stone Age archaeological sites in Ethiopia, Kenya, and Zambia based on ungulate stable isotopes. J Hum Evol, 106, 19-37. doi:10.1016/j.jhevol.2017.01.101
Kalemba Rockshelter	Kalemba Rockshelter			40000 - 8000 BP	Kobus ellipsiprymnus	-0.4	-6.2	Grazer		Robinson, J. R. (2017). Thinking locally: environmental reconstruction of Middle and Later Stone Age archaeological sites in Ethiopia, Kenya, and Zambia based on ungulate stable isotopes. J Hum Evol, 106, 19-37. doi:10.1016/j.jhevol.2017.01.102
Kalemba Rockshelter	Kalemba Rockshelter			40000 - 8000 BP	Kobus ellipsiprymnus	-0.5	-3.2	Grazer		Robinson, J. R. (2017). Thinking locally: environmental reconstruction of Middle and Later Stone Age archaeological sites in Ethiopia, Kenya, and Zambia based on ungulate stable isotopes. J Hum Evol, 106, 19-37. doi:10.1016/j.jhevol.2017.01.103
Kalemba Rockshelter	Kalemba Rockshelter			40000 - 8000 BP	Redunca arundinum	1.8	-1.3	Grazer		Robinson, J. R. (2017). Thinking locally: environmental reconstruction of Middle and Later Stone Age archaeological sites in Ethiopia, Kenya, and Zambia based on ungulate stable isotopes. J Hum Evol, 106, 19-37. doi:10.1016/j.jhevol.2017.01.104
Kalemba Rockshelter	Kalemba Rockshelter			40000 - 8000 BP	Redunca arundinum	0.4	-4.4	Grazer		Robinson, J. R. (2017). Thinking locally: environmental reconstruction of Middle and Later Stone Age archaeological sites in Ethiopia, Kenya, and Zambia based on ungulate stable isotopes. J Hum Evol, 106, 19-37. doi:10.1016/j.jhevol.2017.01.105
Kalemba Rockshelter	Kalemba Rockshelter			40000 - 8000 BP	Redunca arundinum	-0.9	-1.2	Grazer		Robinson, J. R. (2017). Thinking locally: environmental reconstruction of Middle and Later Stone Age archaeological sites in Ethiopia, Kenya, and Zambia based on ungulate stable isotopes. J Hum Evol, 106, 19-37. doi:10.1016/j.jhevol.2017.01.106
Kalemba Rockshelter	Kalemba Rockshelter			40000 - 8000 BP	Redunca arundinum	-10.1	-0.1	Grazer		Robinson, J. R. (2017). Thinking locally: environmental reconstruction of Middle and Later Stone Age archaeological sites in Ethiopia, Kenya, and Zambia based on ungulate stable isotopes. J Hum Evol, 106, 19-37. doi:10.1016/j.jhevol.2017.01.107
Kalemba Rockshelter	Kalemba Rockshelter			40000 - 8000 BP	Tragelaphus oryx	-12.2	-5.8	Browser		Robinson, J. R. (2017). Thinking locally: environmental reconstruction of Middle and Later Stone Age archaeological sites in Ethiopia, Kenya, and Zambia based on ungulate stable isotopes. J Hum Evol, 106, 19-37. doi:10.1016/j.jhevol.2017.01.108
Kalemba Rockshelter	Kalemba Rockshelter			40000 - 8000 BP	Tragelaphus oryx	-2.3	-1.2	Browser		Robinson, J. R. (2017). Thinking locally: environmental reconstruction of Middle and Later Stone Age archaeological sites in Ethiopia, Kenya, and Zambia based on ungulate stable isotopes. J Hum Evol, 106, 19-37. doi:10.1016/j.jhevol.2017.01.109
Kalemba Rockshelter	Kalemba Rockshelter			40000 - 8000 BP	Tragelaphus oryx	-14.7	-7.4	Browser		Robinson, J. R. (2017). Thinking locally: environmental reconstruction of Middle and Later Stone Age archaeological sites in Ethiopia, Kenya, and Zambia based on ungulate stable isotopes. J Hum Evol, 106, 19-37. doi:10.1016/j.jhevol.2017.01.110
Kalemba Rockshelter	Kalemba Rockshelter			40000 - 8000 BP	Tragelaphus oryx	-13	-4	Browser		Robinson, J. R. (2017). Thinking locally: environmental reconstruction of Middle and Later Stone Age archaeological sites in Ethiopia, Kenya, and Zambia based on ungulate stable isotopes. J Hum Evol, 106, 19-37. doi:10.1016/j.jhevol.2017.01.111
Kalemba Rockshelter	Kalemba Rockshelter			40000 - 8000 BP	Tragelaphus scriptus	-10.9	-0.7	Browser		Robinson, J. R. (2017). Thinking locally: environmental reconstruction of Middle and Later Stone Age archaeological sites in Ethiopia, Kenya, and Zambia based on ungulate stable isotopes. J Hum Evol, 106, 19-37. doi:10.1016/j.jhevol.2017.01.112
Kalemba Rockshelter	Kalemba Rockshelter			40000 - 8000 BP	Phacochoerus africanus	-5.6	-2.7	Grazer		Robinson, J. R. (2017). Thinking locally: environmental reconstruction of Middle and Later Stone Age archaeological sites in Ethiopia, Kenya, and Zambia based on ungulate stable isotopes. J Hum Evol, 106, 19-37. doi:10.1016/j.jhevol.2017.01.113
Kalemba Rockshelter	Kalemba Rockshelter			40000 - 8000 BP	Phacochoerus africanus	-8.5	-5.1	Grazer		Robinson, J. R. (2017). Thinking locally: environmental reconstruction of Middle and Later Stone Age archaeological sites in Ethiopia, Kenya, and Zambia based on ungulate stable isotopes. J Hum Evol, 106, 19-37. doi:10.1016/j.jhevol.2017.01.114
Kalemba Rockshelter	Kalemba Rockshelter			40000 - 8000 BP	Phacochoerus africanus	-1.9	-4.2	Grazer		Robinson, J. R. (2017). Thinking locally: environmental reconstruction of Middle and Later Stone Age archaeological sites in Ethiopia, Kenya, and Zambia based on ungulate stable isotopes. J Hum Evol, 106, 19-37. doi:10.1016/j.jhevol.2017.01.115
Kalemba Rockshelter	Kalemba Rockshelter			40000 - 8000 BP	Phacochoerus africanus	-4.6	-5.9	Grazer		Robinson, J. R. (2017). Thinking locally: environmental reconstruction of Middle and Later Stone Age archaeological sites in Ethiopia, Kenya, and Zambia based on ungulate stable isotopes. J Hum Evol, 106, 19-37. doi:10.1016/j.jhevol.2017.01.116
Kalemba Rockshelter	Kalemba Rockshelter			40000 - 8000 BP	Phacochoerus africanus	-2.5	-2.9	Grazer		Robinson, J. R. (2017). Thinking locally: environmental reconstruction of Middle and Later Stone Age archaeological sites in Ethiopia, Kenya, and Zambia based on ungulate stable isotopes. J Hum Evol, 106, 19-37. doi:10.1016/j.jhevol.2017.01.117
Kalemba Rockshelter	Kalemba Rockshelter			40000 - 8000 BP	Potamochoerus porcus	-1.3	-1	Omnivore		Robinson, J. R. (2017). Thinking locally: environmental reconstruction of Middle and Later Stone Age archaeological sites in Ethiopia, Kenya, and Zambia based on ungulate stable isotopes. J Hum Evol, 106, 19-37. doi:10.1016/j.jhevol.2017.01.118
Kalemba Rockshelter	Kalemba Rockshelter			40000 - 8000 BP	Potamochoerus porcus	-11.4	-2.8	Omnivore		Robinson, J. R. (2017). Thinking locally: environmental reconstruction of Middle and Later Stone Age archaeological sites in Ethiopia, Kenya, and Zambia based on ungulate stable isotopes. J Hum Evol, 106, 19-37. doi:10.1016/j.jhevol.2017.01.119
Kalemba Rockshelter	Kalemba Rockshelter			40000 - 8000 BP	Potamochoerus porcus	-9.9	-2.3	Omnivore		Robinson, J. R. (2017). Thinking locally: environmental reconstruction of Middle and Later Stone Age archaeological sites in Ethiopia, Kenya, and Zambia based on ungulate stable isotopes. J Hum Evol, 106, 19-37. doi:10.1016/j.jhevol.2017.01.120
Kalemba Rockshelter	Kalemba Rockshelter			40000 - 8000 BP	Potamochoerus porcus	-2.5	-5.9	Omnivore		Robinson, J. R. (2017). Thinking locally: environmental reconstruction of Middle and Later Stone Age archaeological sites in Ethiopia, Kenya, and Zambia based on ungulate stable isotopes. J Hum Evol, 106, 19-37. doi:10.1016/j.jhevol.2017.01.121
Kalemba Rockshelter	Kalemba Rockshelter			40000 - 8000 BP	Potamochoerus porcus	-13	-7.3	Omnivore		Robinson, J. R. (2017). Thinking locally: environmental reconstruction of Middle and Later Stone Age archaeological sites in Ethiopia, Kenya, and Zambia based on ungulate stable isotopes. J Hum Evol, 106, 19-37. doi:10.1016/j.jhevol.2017.01.122
Kalemba Rockshelter	Kalemba Rockshelter			40000 - 8000 BP	Potamochoerus porcus	-0.1	-4.8	Omnivore		Robinson, J. R. (2017). Thinking locally: environmental reconstruction of Middle and Later Stone Age archaeological sites in Ethiopia, Kenya, and Zambia based on ungulate stable isotopes. J Hum Evol, 106, 19-37. doi:10.1016/j.jhevol.2017.01.123
Kalemba Rockshelter	Kalemba Rockshelter			40000 - 8000 BP	Potamochoerus porcus	-13.1	-7.5	Omnivore		Robinson, J. R. (2017). Thinking locally: environmental reconstruction of Middle and Later Stone Age archaeological sites in Ethiopia, Kenya, and Zambia based on ungulate stable isotopes. J Hum Evol, 106, 19-37. doi:10.1016/j.jhevol.2017.01.124
Kalemba Rockshelter	Kalemba Rockshelter			40000 - 8000 BP	Potamochoerus porcus	-7.7	-6.8	Omnivore		Robinson, J. R. (2017). Thinking locally: environmental reconstruction of Middle and Later Stone Age archaeological sites in Ethiopia, Kenya, and Zambia based on ungulate stable isotopes. J Hum Evol, 106, 19-37. doi:10.1016/j.jhevol.2017.01.125
Kalemba Rockshelter	Kalemba Rockshelter			40000 - 8000 BP	Potamochoerus porcus	-10.9	-6.6	Omnivore		Robinson, J. R. (2017). Thinking locally: environmental reconstruction of Middle and Later Stone Age archaeological sites in Ethiopia, Kenya, and Zambia based on ungulate stable isotopes. J Hum Evol, 106, 19-37. doi:10.1016/j.jhevol.2017.01.126
Kalemba Rockshelter	Kalemba Rockshelter			40000 - 8000 BP	Equus quagga	-1.8	-2.3	Grazer		Robinson, J. R. (2017). Thinking locally: environmental reconstruction of Middle and Later Stone Age archaeological sites in Ethiopia, Kenya, and Zambia based on ungulate stable isotopes. J Hum Evol, 106, 19-37. doi:10.1016/j.jhevol.2017.01.127
Kalemba Rockshelter	Kalemba Rockshelter			40000 - 8000 BP	Equus quagga	-0.7	-2.1	Grazer		Robinson, J. R. (2017). Thinking locally: environmental reconstruction of Middle and Later Stone Age archaeological sites in Ethiopia, Kenya, and Zambia based on ungulate stable isotopes. J Hum Evol, 106, 19-37. doi:10.1016/j.jhevol.2017.01.128
Kalemba Rockshelter	Kalemba Rockshelter			40000 - 8000 BP	Equus quagga	-2.3	-1.8	Grazer		Robinson, J. R. (2017). Thinking locally: environmental reconstruction of Middle and Later Stone Age archaeological sites in Ethiopia, Kenya, and Zambia based on ungulate stable isotopes. J Hum Evol, 106, 19-37. doi:10.1016/j.jhevol.2017.01.129
Kalemba Rockshelter	Kalemba Rockshelter			40000 - 8000 BP	Equus quagga	-3.9	-2.9	Grazer		Robinson, J. R. (2017). Thinking locally: environmental reconstruction of Middle and Later Stone Age archaeological sites in Ethiopia, Kenya, and Zambia based on ungulate stable isotopes. J Hum Evol, 106, 19-37. doi:10.1016/j.jhevol.2017.01.130
Kalemba Rockshelter	Kalemba Rockshelter			40000 - 8000 BP	Equus quagga	-1.3	-3.6	Grazer		Robinson, J. R. (2017). Thinking locally: environmental reconstruction of Middle and Later Stone Age archaeological sites in Ethiopia, Kenya, and Zambia based on ungulate stable isotopes. J Hum Evol, 106, 19-37. doi:10.1016/j.jhevol.2017.01.131
Kalemba Rockshelter	Kalemba Rockshelter			40000 - 8000 BP	Equus quagga	-4.3	-4.2	Grazer		Robinson, J. R. (2017). Thinking locally: environmental reconstruction of Middle and Later Stone Age archaeological sites in Ethiopia, Kenya, and Zambia based on ungulate stable isotopes. J Hum Evol, 106, 19-37. doi:10.1016/j.jhevol.2017.01.132
Kalemba Rockshelter	Kalemba Rockshelter			40000 - 8000 BP	Equus quagga	-2.1	-3.3	Grazer		Robinson, J. R. (2017). Thinking locally: environmental reconstruction of Middle and Later Stone Age archaeological sites in Ethiopia, Kenya, and Zambia based on ungulate stable isotopes. J Hum Evol, 106, 19-37. doi:10.1016/j.jhevol.2017.01.133
Kalemba Rockshelter	Kalemba Rockshelter			40000 - 8000 BP	Equus quagga	0	-5.4	Grazer		Robinson, J. R. (2017). Thinking locally: environmental reconstruction of Middle and Later Stone Age archaeological sites in Ethiopia, Kenya, and Zambia based on ungulate stable isotopes. J Hum Evol, 106, 19-37. doi:10.1016/j.jhevol.2017.01.134
Kalemba Rockshelter	Kalemba Rockshelter			40000 - 8000 BP	Equus quagga	-0.3	-4.9	Grazer		Robinson, J. R. (2017). Thinking locally: environmental reconstruction of Middle and Later Stone Age archaeological sites in Ethiopia, Kenya, and Zambia based on ungulate stable isotopes. J Hum Evol, 106, 19-37. doi:10.1016/j.jhevol.2017.01.135
Kalemba Rockshelter	Kalemba Rockshelter			40000 - 8000 BP	Equus quagga	-11.2	-4.6	Grazer		Robinson, J. R. (2017). Thinking locally: environmental reconstruction of Middle and Later Stone Age archaeological sites in Ethiopia, Kenya, and Zambia based on ungulate stable isotopes. J Hum Evol, 106, 19-37. doi:10.1016/j.jhevol.2017.01.136
Kalemba Rockshelter	Kalemba Rockshelter			40000 - 8000 BP	Equus quagga	-0.6	-4.8	Grazer		Robinson, J. R. (2017). Thinking locally: environmental reconstruction of Middle and Later Stone Age archaeological sites in Ethiopia, Kenya, and Zambia based on ungulate stable isotopes. J Hum Evol, 106, 19-37. doi:10.1016/j.jhevol.2017.01.137
Kalemba Rockshelter	Kalemba Rockshelter			40000 - 8000 BP	Equus quagga	-0.7	-5.1	Grazer		Robinson, J. R. (2017). Thinking locally: environmental reconstruction of Middle and Later Stone Age archaeological sites in Ethiopia, Kenya, and Zambia based on ungulate stable isotopes. J Hum Evol, 106, 19-37. doi:10.1016/j.jhevol.2017.01.138
Kalemba Rockshelter	Kalemba Rockshelter			40000 - 8000 BP	Equus quagga	-3	-4.7	Grazer		Robinson, J. R. (2017). Thinking locally: environmental reconstruction of Middle and Later Stone Age archaeological sites in Ethiopia, Kenya, and Zambia based on ungulate stable isotopes. J Hum Evol, 106, 19-37. doi:10.1016/j.jhevol.2017.01.139
Kalemba Rockshelter	Kalemba Rockshelter			40000 - 8000 BP	Equus quagga	-2.5	-4.9	Grazer		Robinson, J. R. (2017). Thinking locally: environmental reconstruction of Middle and Later Stone Age archaeological sites in Ethiopia, Kenya, and Zambia based on ungulate stable isotopes. J Hum Evol, 106, 19-37. doi:10.1016/j.jhevol.2017.01.140
Kalemba Rockshelter	Kalemba Rockshelter			40000 - 8000 BP	Equus quagga	-4.1	-4.3	Grazer		Robinson, J. R. (2017). Thinking locally: environmental reconstruction of Middle and Later Stone Age archaeological sites in Ethiopia, Kenya, and Zambia based on ungulate stable isotopes. J Hum Evol, 106, 19-37. doi:10.1016/j.jhevol.2017.01.141
Kalemba Rockshelter	Kalemba Rockshelter			40000 - 8000 BP	Equus quagga	-5.9	-4.6	Grazer		Robinson, J. R. (2017). Thinking locally: environmental reconstruction of Middle and Later Stone Age archaeological sites in Ethiopia, Kenya, and Zambia based on ungulate stable isotopes. J Hum Evol, 106, 19-37. doi:10.1016/j.jhevol.2017.01.142
Kalemba Rockshelter	Kalemba Rockshelter			40000 - 8000 BP	Equus quagga	-8.7	-4.6	Grazer		Robinson, J. R. (2017). Thinking locally: environmental reconstruction of Middle and Later Stone Age archaeological sites in Ethiopia, Kenya, and Zambia based on ungulate stable isotopes. J Hum Evol, 106, 19-37. doi:10.1016/j.jhevol.2017.01.143
Kalemba Rockshelter	Kalemba Rockshelter			40000 - 8000 BP	Equus quagga	-1.9	-3.9	Grazer		Robinson, J. R. (2017). Thinking locally: environmental reconstruction of Middle and Later Stone Age archaeological sites in Ethiopia, Kenya, and Zambia based on ungulate stable isotopes. J Hum Evol, 106, 19-37. doi:10.1016/j.jhevol.2017.01.144
Kalemba Rockshelter	Kalemba Rockshelter			40000 - 8000 BP	Equus quagga	-2.4	-5.7	Grazer		Robinson, J. R. (2017). Thinking locally: environmental reconstruction of Middle and Later Stone Age archaeological sites in Ethiopia, Kenya, and Zambia based on ungulate stable isotopes. J Hum Evol, 106, 19-37. doi:10.1016/j.jhevol.2017.01.145
Kalemba Rockshelter	Kalemba Rockshelter			40000 - 8000 BP	Equus quagga	0.5	-5	Grazer		Robinson, J. R. (2017). Thinking locally: environmental reconstruction of Middle and Later Stone Age archaeological sites in Ethiopia, Kenya, and Zambia based on ungulate stable isotopes. J Hum Evol, 106, 19-37. doi:10.1016/j.jhevol.2017.01.146
Kalemba Rockshelter	Kalemba Rockshelter			40000 - 8000 BP	Equus quagga	-2.2	-5.7	Grazer		Robinson, J. R. (2017). Thinking locally: environmental reconstruction of Middle and Later Stone Age archaeological sites in Ethiopia, Kenya, and Zambia based on ungulate stable isotopes. J Hum Evol, 106, 19-37. doi:10.1016/j.jhevol.2017.01.147
Kalemba Rockshelter	Kalemba Rockshelter			40000 - 8000 BP	Equus quagga	-7.4	-5.8	Grazer		Robinson, J. R. (2017). Thinking locally: environmental reconstruction of Middle and Later Stone Age archaeological sites in Ethiopia, Kenya, and Zambia based on ungulate stable isotopes. J Hum Evol, 106, 19-37. doi:10.1016/j.jhevol.2017.01.148
Kalemba Rockshelter	Kalemba Rockshelter			40000 - 8000 BP	Equus quagga	-1.4	-5.6	Grazer		Robinson, J. R. (2017). Thinking locally: environmental reconstruction of Middle and Later Stone Age archaeological sites in Ethiopia, Kenya, and Zambia based on ungulate stable isotopes. J Hum Evol, 106, 19-37. doi:10.1016/j.jhevol.2017.01.149
Kalemba Rockshelter	Kalemba Rockshelter			40000 - 8000 BP	Equus quagga	-1.3	-4.9	Grazer		Robinson, J. R. (2017). Thinking locally: environmental reconstruction of Middle and Later Stone Age archaeological sites in Ethiopia, Kenya, and Zambia based on ungulate stable isotopes. J Hum Evol, 106, 19-37. doi:10.1016/j.jhevol.2017.01.150
Kalemba Rockshelter	Kalemba Rockshelter			40000 - 8000 BP	Equus quagga	0.3	-5.1	Grazer		Robinson, J. R. (2017). Thinking locally: environmental reconstruction of Middle and Later Stone Age archaeological sites in Ethiopia, Kenya, and Zambia based on ungulate stable isotopes. J Hum Evol, 106, 19-37. doi:10.1016/j.jhevol.2017.01.151
Kalemba Rockshelter	Kalemba Rockshelter			40000 - 8000 BP	Equus quagga	-3.1	-6.1	Grazer		Robinson, J. R. (2017). Thinking locally: environmental reconstruction of Middle and Later Stone Age archaeological sites in Ethiopia, Kenya, and Zambia based on ungulate stable isotopes. J Hum Evol, 106, 19-37. doi:10.1016/j.jhevol.2017.01.152
Kalemba Rockshelter	Kalemba Rockshelter			40000 - 8000 BP	Equus quagga	-4.9	-3.9	Grazer		Robinson, J. R. (2017). Thinking locally: environmental reconstruction of Middle and Later Stone Age archaeological sites in Ethiopia, Kenya, and Zambia based on ungulate stable isotopes. J Hum Evol, 106, 19-37. doi:10.1016/j.jhevol.2017.01.153
Kalemba Rockshelter	Kalemba Rockshelter			40000 - 8000 BP	Equus quagga	-0.2	-2.1	Grazer		Robinson, J. R. (2017). Thinking locally: environmental reconstruction of Middle and Later Stone Age archaeological sites in Ethiopia, Kenya, and Zambia based on ungulate stable isotopes. J Hum Evol, 106, 19-37. doi:10.1016/j.jhevol.2017.01.154
Kalemba Rockshelter	Kalemba Rockshelter			40000 - 8000 BP	Equus quagga	-4.9	-4	Grazer		Robinson, J. R. (2017). Thinking locally: environmental reconstruction of Middle and Later Stone Age archaeological sites in Ethiopia, Kenya, and Zambia based on ungulate stable isotopes. J Hum Evol, 106, 19-37. doi:10.1016/j.jhevol.2017.01.155
Kalemba Rockshelter	Kalemba Rockshelter			40000 - 8000 BP	Equus quagga	-2.6	-2	Grazer		Robinson, J. R. (2017). Thinking locally: environmental reconstruction of Middle and Later Stone Age archaeological sites in Ethiopia, Kenya, and Zambia based on ungulate stable isotopes. J Hum Evol, 106, 19-37. doi:10.1016/j.jhevol.2017.01.156
Kalemba Rockshelter	Kalemba Rockshelter			40000 - 8000 BP	Equus quagga	-1	-2.4	Grazer		Robinson, J. R. (2017). Thinking locally: environmental reconstruction of Middle and Later Stone Age archaeological sites in Ethiopia, Kenya, and Zambia based on ungulate stable isotopes. J Hum Evol, 106, 19-37. doi:10.1016/j.jhevol.2017.01.157
Kalemba Rockshelter	Kalemba Rockshelter			40000 - 8000 BP	Equus quagga	-6.4	-2.9	Grazer		Robinson, J. R. (2017). Thinking locally: environmental reconstruction of Middle and Later Stone Age archaeological sites in Ethiopia, Kenya, and Zambia based on ungulate stable isotopes. J Hum Evol, 106, 19-37. doi:10.1016/j.jhevol.2017.01.158
Kalemba Rockshelter	Kalemba Rockshelter			40000 - 8000 BP	Equus quagga	-9.7	-0.3	Grazer		Robinson, J. R. (2017). Thinking locally: environmental reconstruction of Middle and Later Stone Age archaeological sites in Ethiopia, Kenya, and Zambia based on ungulate stable isotopes. J Hum Evol, 106, 19-37. doi:10.1016/j.jhevol.2017.01.159
Kalemba Rockshelter	Kalemba Rockshelter			40000 - 8000 BP	Equus quagga	-9.1	-0.8	Grazer		Robinson, J. R. (2017). Thinking locally: environmental reconstruction of Middle and Later Stone Age archaeological sites in Ethiopia, Kenya, and Zambia based on ungulate stable isotopes. J Hum Evol, 106, 19-37. doi:10.1016/j.jhevol.2017.01.160
Lukenya	Lukenya			46000 - 15000 BP	Eudorcas thomsonii	-4.5	-0.4	Mixed Feeder		Robinson, J. R. (2017). Thinking locally: environmental reconstruction of Middle and Later Stone Age archaeological sites in Ethiopia, Kenya, and Zambia based on ungulate stable isotopes. J Hum Evol, 106, 19-37. doi:10.1016/j.jhevol.2017.01.161
Lukenya	Lukenya			46000 - 26000 BP	Eudorcas thomsonii	-4	-2.8	Mixed Feeder		Robinson, J. R. (2017). Thinking locally: environmental reconstruction of Middle and Later Stone Age archaeological sites in Ethiopia, Kenya, and Zambia based on ungulate stable isotopes. J Hum Evol, 106, 19-37. doi:10.1016/j.jhevol.2017.01.162
Lukenya	Lukenya			30000 - 25000 BP	Eudorcas thomsonii	-5	0.1	Mixed Feeder		Robinson, J. R. (2017). Thinking locally: environmental reconstruction of Middle and Later Stone Age archaeological sites in Ethiopia, Kenya, and Zambia based on ungulate stable isotopes. J Hum Evol, 106, 19-37. doi:10.1016/j.jhevol.2017.01.163
Lukenya	Lukenya			38000 - 42000 BP	Eudorcas thomsonii	-0.1	-3	Mixed Feeder		Robinson, J. R. (2017). Thinking locally: environmental reconstruction of Middle and Later Stone Age archaeological sites in Ethiopia, Kenya, and Zambia based on ungulate stable isotopes. J Hum Evol, 106, 19-37. doi:10.1016/j.jhevol.2017.01.164
Lukenya	Lukenya			46000 - 15000 BP	Nanger granti	-7	0.6	Mixed Feeder		Robinson, J. R. (2017). Thinking locally: environmental reconstruction of Middle and Later Stone Age archaeological sites in Ethiopia, Kenya, and Zambia based on ungulate stable isotopes. J Hum Evol, 106, 19-37. doi:10.1016/j.jhevol.2017.01.165
Lukenya	Lukenya			12000 - 16000 BP	Alcelaphus buselaphus	-1.8	-2.4	Grazer		Robinson, J. R. (2017). Thinking locally: environmental reconstruction of Middle and Later Stone Age archaeological sites in Ethiopia, Kenya, and Zambia based on ungulate stable isotopes. J Hum Evol, 106, 19-37. doi:10.1016/j.jhevol.2017.01.166
Lukenya	Lukenya			12000 - 16000 BP	Alcelaphus buselaphus	-0.8	-1.9	Grazer		Robinson, J. R. (2017). Thinking locally: environmental reconstruction of Middle and Later Stone Age archaeological sites in Ethiopia, Kenya, and Zambia based on ungulate stable isotopes. J Hum Evol, 106, 19-37. doi:10.1016/j.jhevol.2017.01.167
Lukenya	Lukenya			12000 - 16000 BP	Alcelaphus buselaphus	-2.3	-4	Grazer		Robinson, J. R. (2017). Thinking locally: environmental reconstruction of Middle and Later Stone Age archaeological sites in Ethiopia, Kenya, and Zambia based on ungulate stable isotopes. J Hum Evol, 106, 19-37. doi:10.1016/j.jhevol.2017.01.168
Lukenya	Lukenya			46000 - 15000 BP	Alcelaphus buselaphus	0.7	-3.5	Grazer		Robinson, J. R. (2017). Thinking locally: environmental reconstruction of Middle and Later Stone Age archaeological sites in Ethiopia, Kenya, and Zambia based on ungulate stable isotopes. J Hum Evol, 106, 19-37. doi:10.1016/j.jhevol.2017.01.169
Lukenya	Lukenya			46000 - 15000 BP	Alcelaphus buselaphus	0	-1.3	Grazer		Robinson, J. R. (2017). Thinking locally: environmental reconstruction of Middle and Later Stone Age archaeological sites in Ethiopia, Kenya, and Zambia based on ungulate stable isotopes. J Hum Evol, 106, 19-37. doi:10.1016/j.jhevol.2017.01.170
Lukenya	Lukenya			46000 - 15000 BP	Alcelaphus buselaphus	-2.1	-3	Grazer		Robinson, J. R. (2017). Thinking locally: environmental reconstruction of Middle and Later Stone Age archaeological sites in Ethiopia, Kenya, and Zambia based on ungulate stable isotopes. J Hum Evol, 106, 19-37. doi:10.1016/j.jhevol.2017.01.171
Lukenya	Lukenya			46000 - 26000 BP	Alcelaphus buselaphus	-3.9	-3.6	Grazer		Robinson, J. R. (2017). Thinking locally: environmental reconstruction of Middle and Later Stone Age archaeological sites in Ethiopia, Kenya, and Zambia based on ungulate stable isotopes. J Hum Evol, 106, 19-37. doi:10.1016/j.jhevol.2017.01.172
Lukenya	Lukenya			46000 - 26000 BP	Alcelaphus buselaphus	0.8	-3.3	Grazer		Robinson, J. R. (2017). Thinking locally: environmental reconstruction of Middle and Later Stone Age archaeological sites in Ethiopia, Kenya, and Zambia based on ungulate stable isotopes. J Hum Evol, 106, 19-37. doi:10.1016/j.jhevol.2017.01.173
Lukenya	Lukenya			46000 - 26000 BP	Alcelaphus buselaphus	1	-4.6	Grazer		Robinson, J. R. (2017). Thinking locally: environmental reconstruction of Middle and Later Stone Age archaeological sites in Ethiopia, Kenya, and Zambia based on ungulate stable isotopes. J Hum Evol, 106, 19-37. doi:10.1016/j.jhevol.2017.01.174
Lukenya	Lukenya			46000 - 26000 BP	Alcelaphus buselaphus	0.8	-3.8	Grazer		Robinson, J. R. (2017). Thinking locally: environmental reconstruction of Middle and Later Stone Age archaeological sites in Ethiopia, Kenya, and Zambia based on ungulate stable isotopes. J Hum Evol, 106, 19-37. doi:10.1016/j.jhevol.2017.01.175
Lukenya	Lukenya			30000 - 25000 BP	Alcelaphus buselaphus	1.3	-3.5	Grazer		Robinson, J. R. (2017). Thinking locally: environmental reconstruction of Middle and Later Stone Age archaeological sites in Ethiopia, Kenya, and Zambia based on ungulate stable isotopes. J Hum Evol, 106, 19-37. doi:10.1016/j.jhevol.2017.01.176
Lukenya	Lukenya			30000 - 25000 BP	Alcelaphus buselaphus	1.4	-4.4	Grazer		Robinson, J. R. (2017). Thinking locally: environmental reconstruction of Middle and Later Stone Age archaeological sites in Ethiopia, Kenya, and Zambia based on ungulate stable isotopes. J Hum Evol, 106, 19-37. doi:10.1016/j.jhevol.2017.01.177
Lukenya	Lukenya			30000 - 25000 BP	Alcelaphus buselaphus	-0.4	-5.2	Grazer		Robinson, J. R. (2017). Thinking locally: environmental reconstruction of Middle and Later Stone Age archaeological sites in Ethiopia, Kenya, and Zambia based on ungulate stable isotopes. J Hum Evol, 106, 19-37. doi:10.1016/j.jhevol.2017.01.178
Lukenya	Lukenya			30000 - 25000 BP	Alcelaphus buselaphus	-1.8	-5.7	Grazer		Robinson, J. R. (2017). Thinking locally: environmental reconstruction of Middle and Later Stone Age archaeological sites in Ethiopia, Kenya, and Zambia based on ungulate stable isotopes. J Hum Evol, 106, 19-37. doi:10.1016/j.jhevol.2017.01.179
Lukenya	Lukenya			12000 - 16000 BP	Connochaetes taurinus	-0.7	-3.2	Grazer		Robinson, J. R. (2017). Thinking locally: environmental reconstruction of Middle and Later Stone Age archaeological sites in Ethiopia, Kenya, and Zambia based on ungulate stable isotopes. J Hum Evol, 106, 19-37. doi:10.1016/j.jhevol.2017.01.180
Lukenya	Lukenya			12000 - 16000 BP	Connochaetes taurinus	0.2	-3.2	Grazer		Robinson, J. R. (2017). Thinking locally: environmental reconstruction of Middle and Later Stone Age archaeological sites in Ethiopia, Kenya, and Zambia based on ungulate stable isotopes. J Hum Evol, 106, 19-37. doi:10.1016/j.jhevol.2017.01.181
Lukenya	Lukenya			46000 - 15000 BP	Connochaetes taurinus	1.6	1.5	Grazer		Robinson, J. R. (2017). Thinking locally: environmental reconstruction of Middle and Later Stone Age archaeological sites in Ethiopia, Kenya, and Zambia based on ungulate stable isotopes. J Hum Evol, 106, 19-37. doi:10.1016/j.jhevol.2017.01.182
Lukenya	Lukenya			46000 - 15000 BP	Connochaetes taurinus	0.3	-2.9	Grazer		Robinson, J. R. (2017). Thinking locally: environmental reconstruction of Middle and Later Stone Age archaeological sites in Ethiopia, Kenya, and Zambia based on ungulate stable isotopes. J Hum Evol, 106, 19-37. doi:10.1016/j.jhevol.2017.01.183
Lukenya	Lukenya			46000 - 15000 BP	Connochaetes taurinus	-0.5	-2.3	Grazer		Robinson, J. R. (2017). Thinking locally: environmental reconstruction of Middle and Later Stone Age archaeological sites in Ethiopia, Kenya, and Zambia based on ungulate stable isotopes. J Hum Evol, 106, 19-37. doi:10.1016/j.jhevol.2017.01.184
Lukenya	Lukenya			46000 - 26000 BP	Connochaetes taurinus	-0.2	-1.1	Grazer		Robinson, J. R. (2017). Thinking locally: environmental reconstruction of Middle and Later Stone Age archaeological sites in Ethiopia, Kenya, and Zambia based on ungulate stable isotopes. J Hum Evol, 106, 19-37. doi:10.1016/j.jhevol.2017.01.185
Lukenya	Lukenya			30000 - 25000 BP	Connochaetes taurinus	-0.4	-0.1	Grazer		Robinson, J. R. (2017). Thinking locally: environmental reconstruction of Middle and Later Stone Age archaeological sites in Ethiopia, Kenya, and Zambia based on ungulate stable isotopes. J Hum Evol, 106, 19-37. doi:10.1016/j.jhevol.2017.01.186
Lukenya	Lukenya			12000 - 16000 BP	Damaliscus hypsodon	-0.7	-2	Grazer		Robinson, J. R. (2017). Thinking locally: environmental reconstruction of Middle and Later Stone Age archaeological sites in Ethiopia, Kenya, and Zambia based on ungulate stable isotopes. J Hum Evol, 106, 19-37. doi:10.1016/j.jhevol.2017.01.187
Lukenya	Lukenya			46000 - 15000 BP	Damaliscus hypsodon	0.2	-0.5	Grazer		Robinson, J. R. (2017). Thinking locally: environmental reconstruction of Middle and Later Stone Age archaeological sites in Ethiopia, Kenya, and Zambia based on ungulate stable isotopes. J Hum Evol, 106, 19-37. doi:10.1016/j.jhevol.2017.01.188
Lukenya	Lukenya			46000 - 15000 BP	Damaliscus hypsodon	-0.2	0.2	Grazer		Robinson, J. R. (2017). Thinking locally: environmental reconstruction of Middle and Later Stone Age archaeological sites in Ethiopia, Kenya, and Zambia based on ungulate stable isotopes. J Hum Evol, 106, 19-37. doi:10.1016/j.jhevol.2017.01.189
Lukenya	Lukenya			46000 - 15000 BP	Damaliscus hypsodon	0.1	-0.7	Grazer		Robinson, J. R. (2017). Thinking locally: environmental reconstruction of Middle and Later Stone Age archaeological sites in Ethiopia, Kenya, and Zambia based on ungulate stable isotopes. J Hum Evol, 106, 19-37. doi:10.1016/j.jhevol.2017.01.190
Lukenya	Lukenya			46000 - 15000 BP	Damaliscus hypsodon	-1.8	-0.7	Grazer		Robinson, J. R. (2017). Thinking locally: environmental reconstruction of Middle and Later Stone Age archaeological sites in Ethiopia, Kenya, and Zambia based on ungulate stable isotopes. J Hum Evol, 106, 19-37. doi:10.1016/j.jhevol.2017.01.191
Lukenya	Lukenya			46000 - 15000 BP	Damaliscus hypsodon	1.9	-2.3	Grazer		Robinson, J. R. (2017). Thinking locally: environmental reconstruction of Middle and Later Stone Age archaeological sites in Ethiopia, Kenya, and Zambia based on ungulate stable isotopes. J Hum Evol, 106, 19-37. doi:10.1016/j.jhevol.2017.01.192
Lukenya	Lukenya			46000 - 15000 BP	Damaliscus hypsodon	-0.5	-0.3	Grazer		Robinson, J. R. (2017). Thinking locally: environmental reconstruction of Middle and Later Stone Age archaeological sites in Ethiopia, Kenya, and Zambia based on ungulate stable isotopes. J Hum Evol, 106, 19-37. doi:10.1016/j.jhevol.2017.01.193
Lukenya	Lukenya			46000 - 15000 BP	Damaliscus hypsodon	1.1	-1.9	Grazer		Robinson, J. R. (2017). Thinking locally: environmental reconstruction of Middle and Later Stone Age archaeological sites in Ethiopia, Kenya, and Zambia based on ungulate stable isotopes. J Hum Evol, 106, 19-37. doi:10.1016/j.jhevol.2017.01.194
Lukenya	Lukenya			46000 - 15000 BP	Damaliscus hypsodon	-1	-0.3	Grazer		Robinson, J. R. (2017). Thinking locally: environmental reconstruction of Middle and Later Stone Age archaeological sites in Ethiopia, Kenya, and Zambia based on ungulate stable isotopes. J Hum Evol, 106, 19-37. doi:10.1016/j.jhevol.2017.01.195
Lukenya	Lukenya			46000 - 15000 BP	Damaliscus hypsodon	0.2	-2.1	Grazer		Robinson, J. R. (2017). Thinking locally: environmental reconstruction of Middle and Later Stone Age archaeological sites in Ethiopia, Kenya, and Zambia based on ungulate stable isotopes. J Hum Evol, 106, 19-37. doi:10.1016/j.jhevol.2017.01.196
Lukenya	Lukenya			46000 - 15000 BP	Damaliscus hypsodon	-0.8	-1.7	Grazer		Robinson, J. R. (2017). Thinking locally: environmental reconstruction of Middle and Later Stone Age archaeological sites in Ethiopia, Kenya, and Zambia based on ungulate stable isotopes. J Hum Evol, 106, 19-37. doi:10.1016/j.jhevol.2017.01.197
Lukenya	Lukenya			46000 - 15000 BP	Damaliscus hypsodon	-0.8	0.7	Grazer		Robinson, J. R. (2017). Thinking locally: environmental reconstruction of Middle and Later Stone Age archaeological sites in Ethiopia, Kenya, and Zambia based on ungulate stable isotopes. J Hum Evol, 106, 19-37. doi:10.1016/j.jhevol.2017.01.198
Lukenya	Lukenya			46000 - 15000 BP	Damaliscus hypsodon	-0.8	-2	Grazer		Robinson, J. R. (2017). Thinking locally: environmental reconstruction of Middle and Later Stone Age archaeological sites in Ethiopia, Kenya, and Zambia based on ungulate stable isotopes. J Hum Evol, 106, 19-37. doi:10.1016/j.jhevol.2017.01.199
Lukenya	Lukenya			46000 - 15000 BP	Damaliscus hypsodon	1.8	-2.4	Grazer		Robinson, J. R. (2017). Thinking locally: environmental reconstruction of Middle and Later Stone Age archaeological sites in Ethiopia, Kenya, and Zambia based on ungulate stable isotopes. J Hum Evol, 106, 19-37. doi:10.1016/j.jhevol.2017.01.200
Lukenya	Lukenya			46000 - 26000 BP	Damaliscus hypsodon	2	-1.2	Grazer		Robinson, J. R. (2017). Thinking locally: environmental reconstruction of Middle and Later Stone Age archaeological sites in Ethiopia, Kenya, and Zambia based on ungulate stable isotopes. J Hum Evol, 106, 19-37. doi:10.1016/j.jhevol.2017.01.201
Lukenya	Lukenya			46000 - 15000 BP	Damaliscus hypsodon	-0.4	-1.6	Grazer		Robinson, J. R. (2017). Thinking locally: environmental reconstruction of Middle and Later Stone Age archaeological sites in Ethiopia, Kenya, and Zambia based on ungulate stable isotopes. J Hum Evol, 106, 19-37. doi:10.1016/j.jhevol.2017.01.202
Lukenya	Lukenya			46000 - 26000 BP	Damaliscus hypsodon	1.2	-4.4	Grazer		Robinson, J. R. (2017). Thinking locally: environmental reconstruction of Middle and Later Stone Age archaeological sites in Ethiopia, Kenya, and Zambia based on ungulate stable isotopes. J Hum Evol, 106, 19-37. doi:10.1016/j.jhevol.2017.01.203
Lukenya	Lukenya			46000 - 26000 BP	Damaliscus hypsodon	-1.5	-3.5	Grazer		Robinson, J. R. (2017). Thinking locally: environmental reconstruction of Middle and Later Stone Age archaeological sites in Ethiopia, Kenya, and Zambia based on ungulate stable isotopes. J Hum Evol, 106, 19-37. doi:10.1016/j.jhevol.2017.01.204
Lukenya	Lukenya			46000 - 26000 BP	Damaliscus hypsodon	0	-3.2	Grazer		Robinson, J. R. (2017). Thinking locally: environmental reconstruction of Middle and Later Stone Age archaeological sites in Ethiopia, Kenya, and Zambia based on ungulate stable isotopes. J Hum Evol, 106, 19-37. doi:10.1016/j.jhevol.2017.01.205
Lukenya	Lukenya			46000 - 26000 BP	Damaliscus hypsodon	-0.8	-3.9	Grazer		Robinson, J. R. (2017). Thinking locally: environmental reconstruction of Middle and Later Stone Age archaeological sites in Ethiopia, Kenya, and Zambia based on ungulate stable isotopes. J Hum Evol, 106, 19-37. doi:10.1016/j.jhevol.2017.01.206
Lukenya	Lukenya			30000 - 25000 BP	Damaliscus hypsodon	1	-4.6	Grazer		Robinson, J. R. (2017). Thinking locally: environmental reconstruction of Middle and Later Stone Age archaeological sites in Ethiopia, Kenya, and Zambia based on ungulate stable isotopes. J Hum Evol, 106, 19-37. doi:10.1016/j.jhevol.2017.01.207
Lukenya	Lukenya			30000 - 25000 BP	Damaliscus hypsodon	0.8	-4.1	Grazer		Robinson, J. R. (2017). Thinking locally: environmental reconstruction of Middle and Later Stone Age archaeological sites in Ethiopia, Kenya, and Zambia based on ungulate stable isotopes. J Hum Evol, 106, 19-37. doi:10.1016/j.jhevol.2017.01.208
Lukenya	Lukenya			30000 - 25000 BP	Damaliscus hypsodon	0	-4.2	Grazer		Robinson, J. R. (2017). Thinking locally: environmental reconstruction of Middle and Later Stone Age archaeological sites in Ethiopia, Kenya, and Zambia based on ungulate stable isotopes. J Hum Evol, 106, 19-37. doi:10.1016/j.jhevol.2017.01.209
Lukenya	Lukenya			30000 - 25000 BP	Damaliscus hypsodon	0.4	-4.6	Grazer		Robinson, J. R. (2017). Thinking locally: environmental reconstruction of Middle and Later Stone Age archaeological sites in Ethiopia, Kenya, and Zambia based on ungulate stable isotopes. J Hum Evol, 106, 19-37. doi:10.1016/j.jhevol.2017.01.210
Lukenya	Lukenya			30000 - 25000 BP	Damaliscus hypsodon	0.6	-2.2	Grazer		Robinson, J. R. (2017). Thinking locally: environmental reconstruction of Middle and Later Stone Age archaeological sites in Ethiopia, Kenya, and Zambia based on ungulate stable isotopes. J Hum Evol, 106, 19-37. doi:10.1016/j.jhevol.2017.01.211
Lukenya	Lukenya			38000 - 42000 BP	Damaliscus hypsodon	0.5	-3.2	Grazer		Robinson, J. R. (2017). Thinking locally: environmental reconstruction of Middle and Later Stone Age archaeological sites in Ethiopia, Kenya, and Zambia based on ungulate stable isotopes. J Hum Evol, 106, 19-37. doi:10.1016/j.jhevol.2017.01.212
Lukenya	Lukenya			38000 - 42000 BP	Damaliscus hypsodon	1.3	-4	Grazer		Robinson, J. R. (2017). Thinking locally: environmental reconstruction of Middle and Later Stone Age archaeological sites in Ethiopia, Kenya, and Zambia based on ungulate stable isotopes. J Hum Evol, 106, 19-37. doi:10.1016/j.jhevol.2017.01.213
Lukenya	Lukenya			38000 - 42000 BP	Damaliscus hypsodon	-1.7	-3.2	Grazer		Robinson, J. R. (2017). Thinking locally: environmental reconstruction of Middle and Later Stone Age archaeological sites in Ethiopia, Kenya, and Zambia based on ungulate stable isotopes. J Hum Evol, 106, 19-37. doi:10.1016/j.jhevol.2017.01.214
Lukenya	Lukenya			38000 - 42000 BP	Damaliscus hypsodon	1.3	-4.4	Grazer		Robinson, J. R. (2017). Thinking locally: environmental reconstruction of Middle and Later Stone Age archaeological sites in Ethiopia, Kenya, and Zambia based on ungulate stable isotopes. J Hum Evol, 106, 19-37. doi:10.1016/j.jhevol.2017.01.215
Lukenya	Lukenya			38000 - 42000 BP	Damaliscus hypsodon	-0.8	-3.4	Grazer		Robinson, J. R. (2017). Thinking locally: environmental reconstruction of Middle and Later Stone Age archaeological sites in Ethiopia, Kenya, and Zambia based on ungulate stable isotopes. J Hum Evol, 106, 19-37. doi:10.1016/j.jhevol.2017.01.216
Lukenya	Lukenya			38000 - 42000 BP	Damaliscus hypsodon	1.1	-1.4	Grazer		Robinson, J. R. (2017). Thinking locally: environmental reconstruction of Middle and Later Stone Age archaeological sites in Ethiopia, Kenya, and Zambia based on ungulate stable isotopes. J Hum Evol, 106, 19-37. doi:10.1016/j.jhevol.2017.01.217
Lukenya	Lukenya			38000 - 42000 BP	Damaliscus hypsodon	0.6	-5.9	Grazer		Robinson, J. R. (2017). Thinking locally: environmental reconstruction of Middle and Later Stone Age archaeological sites in Ethiopia, Kenya, and Zambia based on ungulate stable isotopes. J Hum Evol, 106, 19-37. doi:10.1016/j.jhevol.2017.01.218
Lukenya	Lukenya			38000 - 42000 BP	Damaliscus hypsodon	1.1	-5	Grazer		Robinson, J. R. (2017). Thinking locally: environmental reconstruction of Middle and Later Stone Age archaeological sites in Ethiopia, Kenya, and Zambia based on ungulate stable isotopes. J Hum Evol, 106, 19-37. doi:10.1016/j.jhevol.2017.01.219
Lukenya	Lukenya			38000 - 42000 BP	Damaliscus hypsodon	0.9	-3.7	Grazer		Robinson, J. R. (2017). Thinking locally: environmental reconstruction of Middle and Later Stone Age archaeological sites in Ethiopia, Kenya, and Zambia based on ungulate stable isotopes. J Hum Evol, 106, 19-37. doi:10.1016/j.jhevol.2017.01.220
Lukenya	Lukenya			38000 - 42000 BP	Damaliscus hypsodon	1.3	-2.8	Grazer		Robinson, J. R. (2017). Thinking locally: environmental reconstruction of Middle and Later Stone Age archaeological sites in Ethiopia, Kenya, and Zambia based on ungulate stable isotopes. J Hum Evol, 106, 19-37. doi:10.1016/j.jhevol.2017.01.221
Lukenya	Lukenya			38000 - 42000 BP	Damaliscus hypsodon	2	-2.5	Grazer		Robinson, J. R. (2017). Thinking locally: environmental reconstruction of Middle and Later Stone Age archaeological sites in Ethiopia, Kenya, and Zambia based on ungulate stable isotopes. J Hum Evol, 106, 19-37. doi:10.1016/j.jhevol.2017.01.222
Lukenya	Lukenya			38000 - 42000 BP	Damaliscus hypsodon	1.3	-3.2	Grazer		Robinson, J. R. (2017). Thinking locally: environmental reconstruction of Middle and Later Stone Age archaeological sites in Ethiopia, Kenya, and Zambia based on ungulate stable isotopes. J Hum Evol, 106, 19-37. doi:10.1016/j.jhevol.2017.01.223
Lukenya	Lukenya			38000 - 42000 BP	Damaliscus hypsodon	1.1	-3.9	Grazer		Robinson, J. R. (2017). Thinking locally: environmental reconstruction of Middle and Later Stone Age archaeological sites in Ethiopia, Kenya, and Zambia based on ungulate stable isotopes. J Hum Evol, 106, 19-37. doi:10.1016/j.jhevol.2017.01.224
Lukenya	Lukenya			38000 - 42000 BP	Damaliscus hypsodon	1.3	-4.4	Grazer		Robinson, J. R. (2017). Thinking locally: environmental reconstruction of Middle and Later Stone Age archaeological sites in Ethiopia, Kenya, and Zambia based on ungulate stable isotopes. J Hum Evol, 106, 19-37. doi:10.1016/j.jhevol.2017.01.225
Lukenya	Lukenya			38000 - 42000 BP	Damaliscus hypsodon	-0.2	-4	Grazer		Robinson, J. R. (2017). Thinking locally: environmental reconstruction of Middle and Later Stone Age archaeological sites in Ethiopia, Kenya, and Zambia based on ungulate stable isotopes. J Hum Evol, 106, 19-37. doi:10.1016/j.jhevol.2017.01.226
Lukenya	Lukenya			12000 - 16000 BP	Sylvicapra grimmia	-9.5	-0.4	Browser		Robinson, J. R. (2017). Thinking locally: environmental reconstruction of Middle and Later Stone Age archaeological sites in Ethiopia, Kenya, and Zambia based on ungulate stable isotopes. J Hum Evol, 106, 19-37. doi:10.1016/j.jhevol.2017.01.227
Lukenya	Lukenya			46000 - 26000 BP	Oryx beisa	-0.5	-1	Grazer		Robinson, J. R. (2017). Thinking locally: environmental reconstruction of Middle and Later Stone Age archaeological sites in Ethiopia, Kenya, and Zambia based on ungulate stable isotopes. J Hum Evol, 106, 19-37. doi:10.1016/j.jhevol.2017.01.228
Lukenya	Lukenya			12000 - 16000 BP	Ourebia ourebi	-5	-3.4	Mixed Feeder		Robinson, J. R. (2017). Thinking locally: environmental reconstruction of Middle and Later Stone Age archaeological sites in Ethiopia, Kenya, and Zambia based on ungulate stable isotopes. J Hum Evol, 106, 19-37. doi:10.1016/j.jhevol.2017.01.229
Lukenya	Lukenya			46000 - 26000 BP	Ourebia ourebi	-3.2	-0.8	Mixed Feeder		Robinson, J. R. (2017). Thinking locally: environmental reconstruction of Middle and Later Stone Age archaeological sites in Ethiopia, Kenya, and Zambia based on ungulate stable isotopes. J Hum Evol, 106, 19-37. doi:10.1016/j.jhevol.2017.01.230
Lukenya	Lukenya			12000 - 16000 BP	Redunca fulvorufula	-3.1	0.4	Grazer		Robinson, J. R. (2017). Thinking locally: environmental reconstruction of Middle and Later Stone Age archaeological sites in Ethiopia, Kenya, and Zambia based on ungulate stable isotopes. J Hum Evol, 106, 19-37. doi:10.1016/j.jhevol.2017.01.231
Lukenya	Lukenya			46000 - 15000 BP	Redunca fulvorufula	-0.4	0.2	Grazer		Robinson, J. R. (2017). Thinking locally: environmental reconstruction of Middle and Later Stone Age archaeological sites in Ethiopia, Kenya, and Zambia based on ungulate stable isotopes. J Hum Evol, 106, 19-37. doi:10.1016/j.jhevol.2017.01.232
Lukenya	Lukenya			46000 - 15000 BP	Tragelaphus oryx	-10.1	-1.4	Browser		Robinson, J. R. (2017). Thinking locally: environmental reconstruction of Middle and Later Stone Age archaeological sites in Ethiopia, Kenya, and Zambia based on ungulate stable isotopes. J Hum Evol, 106, 19-37. doi:10.1016/j.jhevol.2017.01.233
Lukenya	Lukenya			46000 - 15000 BP	Tragelaphus oryx	-11	-2.2	Browser		Robinson, J. R. (2017). Thinking locally: environmental reconstruction of Middle and Later Stone Age archaeological sites in Ethiopia, Kenya, and Zambia based on ungulate stable isotopes. J Hum Evol, 106, 19-37. doi:10.1016/j.jhevol.2017.01.234
Lukenya	Lukenya			46000 - 15000 BP	Potamochoerus porcus	-14.4	-7.5	Omnivore		Robinson, J. R. (2017). Thinking locally: environmental reconstruction of Middle and Later Stone Age archaeological sites in Ethiopia, Kenya, and Zambia based on ungulate stable isotopes. J Hum Evol, 106, 19-37. doi:10.1016/j.jhevol.2017.01.235
Lukenya	Lukenya			12000 - 16000 BP	Phacochoerus africanus	-2.7	-0.9	Grazer		Robinson, J. R. (2017). Thinking locally: environmental reconstruction of Middle and Later Stone Age archaeological sites in Ethiopia, Kenya, and Zambia based on ungulate stable isotopes. J Hum Evol, 106, 19-37. doi:10.1016/j.jhevol.2017.01.236
Lukenya	Lukenya			46000 - 15000 BP	Phacochoerus africanus	-1.5	0.6	Grazer		Robinson, J. R. (2017). Thinking locally: environmental reconstruction of Middle and Later Stone Age archaeological sites in Ethiopia, Kenya, and Zambia based on ungulate stable isotopes. J Hum Evol, 106, 19-37. doi:10.1016/j.jhevol.2017.01.237
Lukenya	Lukenya			12000 - 16000 BP	Equus quagga	-2.7	-0.6	Grazer		Robinson, J. R. (2017). Thinking locally: environmental reconstruction of Middle and Later Stone Age archaeological sites in Ethiopia, Kenya, and Zambia based on ungulate stable isotopes. J Hum Evol, 106, 19-37. doi:10.1016/j.jhevol.2017.01.238
Lukenya	Lukenya			46000 - 15000 BP	Equus quagga	-1.9	-5	Grazer		Robinson, J. R. (2017). Thinking locally: environmental reconstruction of Middle and Later Stone Age archaeological sites in Ethiopia, Kenya, and Zambia based on ungulate stable isotopes. J Hum Evol, 106, 19-37. doi:10.1016/j.jhevol.2017.01.239
Lukenya	Lukenya			46000 - 15000 BP	Equus quagga	-0.5	-3.8	Grazer		Robinson, J. R. (2017). Thinking locally: environmental reconstruction of Middle and Later Stone Age archaeological sites in Ethiopia, Kenya, and Zambia based on ungulate stable isotopes. J Hum Evol, 106, 19-37. doi:10.1016/j.jhevol.2017.01.240
Lukenya	Lukenya			46000 - 15000 BP	Equus quagga	-0.6	-2.6	Grazer		Robinson, J. R. (2017). Thinking locally: environmental reconstruction of Middle and Later Stone Age archaeological sites in Ethiopia, Kenya, and Zambia based on ungulate stable isotopes. J Hum Evol, 106, 19-37. doi:10.1016/j.jhevol.2017.01.241
Lukenya	Lukenya			46000 - 26000 BP	Equus quagga	-3.4	-0.1	Grazer		Robinson, J. R. (2017). Thinking locally: environmental reconstruction of Middle and Later Stone Age archaeological sites in Ethiopia, Kenya, and Zambia based on ungulate stable isotopes. J Hum Evol, 106, 19-37. doi:10.1016/j.jhevol.2017.01.242
Lukenya	Lukenya			46000 - 26000 BP	Equus quagga	-3.4	-1.8	Grazer		Robinson, J. R. (2017). Thinking locally: environmental reconstruction of Middle and Later Stone Age archaeological sites in Ethiopia, Kenya, and Zambia based on ungulate stable isotopes. J Hum Evol, 106, 19-37. doi:10.1016/j.jhevol.2017.01.243
Lukenya	Lukenya			46000 - 26000 BP	Equus quagga	0.6	-1.5	Grazer		Robinson, J. R. (2017). Thinking locally: environmental reconstruction of Middle and Later Stone Age archaeological sites in Ethiopia, Kenya, and Zambia based on ungulate stable isotopes. J Hum Evol, 106, 19-37. doi:10.1016/j.jhevol.2017.01.244
Lukenya	Lukenya			30000 - 25000 BP	Equus quagga	-2.4	-1.9	Grazer		Robinson, J. R. (2017). Thinking locally: environmental reconstruction of Middle and Later Stone Age archaeological sites in Ethiopia, Kenya, and Zambia based on ungulate stable isotopes. J Hum Evol, 106, 19-37. doi:10.1016/j.jhevol.2017.01.245
Lukenya	Lukenya			30000 - 25000 BP	Equus quagga	-1.1	-3.4	Grazer		Robinson, J. R. (2017). Thinking locally: environmental reconstruction of Middle and Later Stone Age archaeological sites in Ethiopia, Kenya, and Zambia based on ungulate stable isotopes. J Hum Evol, 106, 19-37. doi:10.1016/j.jhevol.2017.01.246
Lukenya	Lukenya			30000 - 25000 BP	Equus quagga	-2.6	-3.4	Grazer		Robinson, J. R. (2017). Thinking locally: environmental reconstruction of Middle and Later Stone Age archaeological sites in Ethiopia, Kenya, and Zambia based on ungulate stable isotopes. J Hum Evol, 106, 19-37. doi:10.1016/j.jhevol.2017.01.247
Lukenya	Lukenya			30000 - 25000 BP	Equus quagga	-4.1	-2	Grazer		Robinson, J. R. (2017). Thinking locally: environmental reconstruction of Middle and Later Stone Age archaeological sites in Ethiopia, Kenya, and Zambia based on ungulate stable isotopes. J Hum Evol, 106, 19-37. doi:10.1016/j.jhevol.2017.01.248
Lukenya	Lukenya			38000 - 42000 BP	Equus quagga	0.8	-0.9	Grazer		Robinson, J. R. (2017). Thinking locally: environmental reconstruction of Middle and Later Stone Age archaeological sites in Ethiopia, Kenya, and Zambia based on ungulate stable isotopes. J Hum Evol, 106, 19-37. doi:10.1016/j.jhevol.2017.01.249
Lukenya	Lukenya			1100 - 2500 BP	Alcelaphus buselaphus	0.672	-2.65063	Grazer		Robinson, J. R. (2019). A Holocene paleoenvironmental record based on ungulate stable isotopes from Lukenya Hill, Kenya. Journal of Archaeological Science: Reports, 28, 102016. doi:https://doi.org/10.1016/j.jasrep.2019.102016
Lukenya	Lukenya			1100 - 2500 BP	Alcelaphus buselaphus	2.45675	-1.43875	Grazer		Robinson, J. R. (2019). A Holocene paleoenvironmental record based on ungulate stable isotopes from Lukenya Hill, Kenya. Journal of Archaeological Science: Reports, 28, 102016. doi:https://doi.org/10.1016/j.jasrep.2019.102016
Lukenya	Lukenya			1100 - 2500 BP	Alcelaphus buselaphus	2.84575	-2.61075	Grazer		Robinson, J. R. (2019). A Holocene paleoenvironmental record based on ungulate stable isotopes from Lukenya Hill, Kenya. Journal of Archaeological Science: Reports, 28, 102016. doi:https://doi.org/10.1016/j.jasrep.2019.102016
Lukenya	Lukenya			1100 - 2500 BP	Connochaetes taurinus	3.63543	-1.72643	Grazer		Robinson, J. R. (2019). A Holocene paleoenvironmental record based on ungulate stable isotopes from Lukenya Hill, Kenya. Journal of Archaeological Science: Reports, 28, 102016. doi:https://doi.org/10.1016/j.jasrep.2019.102016
Lukenya	Lukenya			1100 - 2500 BP	Connochaetes taurinus	3.29743	-2.74543	Grazer		Robinson, J. R. (2019). A Holocene paleoenvironmental record based on ungulate stable isotopes from Lukenya Hill, Kenya. Journal of Archaeological Science: Reports, 28, 102016. doi:https://doi.org/10.1016/j.jasrep.2019.102016
Lukenya	Lukenya			4000 - 8100 BP	Alcelaphus buselaphus	2.6	-1.9	Grazer		Robinson, J. R. (2019). A Holocene paleoenvironmental record based on ungulate stable isotopes from Lukenya Hill, Kenya. Journal of Archaeological Science: Reports, 28, 102016. doi:https://doi.org/10.1016/j.jasrep.2019.102016
Lukenya	Lukenya			4000 - 8100 BP	Alcelaphus buselaphus	-1.2	-0.7	Grazer		Robinson, J. R. (2019). A Holocene paleoenvironmental record based on ungulate stable isotopes from Lukenya Hill, Kenya. Journal of Archaeological Science: Reports, 28, 102016. doi:https://doi.org/10.1016/j.jasrep.2019.102016
Lukenya	Lukenya			4000 - 8100 BP	Connochaetes taurinus	0.8	-3.2	Grazer		Robinson, J. R. (2019). A Holocene paleoenvironmental record based on ungulate stable isotopes from Lukenya Hill, Kenya. Journal of Archaeological Science: Reports, 28, 102016. doi:https://doi.org/10.1016/j.jasrep.2019.102016
Lukenya	Lukenya			4000 - 8100 BP	Connochaetes taurinus	1.7	1.7	Grazer		Robinson, J. R. (2019). A Holocene paleoenvironmental record based on ungulate stable isotopes from Lukenya Hill, Kenya. Journal of Archaeological Science: Reports, 28, 102016. doi:https://doi.org/10.1016/j.jasrep.2019.102016
Lukenya	Lukenya			4000 - 8100 BP	Connochaetes taurinus	2.4	-3.2	Grazer		Robinson, J. R. (2019). A Holocene paleoenvironmental record based on ungulate stable isotopes from Lukenya Hill, Kenya. Journal of Archaeological Science: Reports, 28, 102016. doi:https://doi.org/10.1016/j.jasrep.2019.102016
Lukenya	Lukenya			4000 - 8100 BP	Eudorcas thomsonii	0.8	-4.7	Mixed Feeder		Robinson, J. R. (2019). A Holocene paleoenvironmental record based on ungulate stable isotopes from Lukenya Hill, Kenya. Journal of Archaeological Science: Reports, 28, 102016. doi:https://doi.org/10.1016/j.jasrep.2019.102016
Lukenya	Lukenya			4000 - 8100 BP	Eudorcas thomsonii	-2.3	-0.1	Mixed Feeder		Robinson, J. R. (2019). A Holocene paleoenvironmental record based on ungulate stable isotopes from Lukenya Hill, Kenya. Journal of Archaeological Science: Reports, 28, 102016. doi:https://doi.org/10.1016/j.jasrep.2019.102016
Lukenya	Lukenya			4000 - 8100 BP	Oreotragus oreotragus	-7.8	-0.3	Mixed Feeder		Robinson, J. R. (2019). A Holocene paleoenvironmental record based on ungulate stable isotopes from Lukenya Hill, Kenya. Journal of Archaeological Science: Reports, 28, 102016. doi:https://doi.org/10.1016/j.jasrep.2019.102016
Lukenya	Lukenya			4000 - 8100 BP	Sylvicapra grimmia	-13	-3.6	Browser		Robinson, J. R. (2019). A Holocene paleoenvironmental record based on ungulate stable isotopes from Lukenya Hill, Kenya. Journal of Archaeological Science: Reports, 28, 102016. doi:https://doi.org/10.1016/j.jasrep.2019.102016
Lukenya	Lukenya			4000 - 8100 BP	Madoqua kirkii	-8.7	0.9	Browser		Robinson, J. R. (2019). A Holocene paleoenvironmental record based on ungulate stable isotopes from Lukenya Hill, Kenya. Journal of Archaeological Science: Reports, 28, 102016. doi:https://doi.org/10.1016/j.jasrep.2019.102016
Lukenya	Lukenya			4000 - 8100 BP	Ourebia ourebi	-0.3	-0.8	Mixed Feeder		Robinson, J. R. (2019). A Holocene paleoenvironmental record based on ungulate stable isotopes from Lukenya Hill, Kenya. Journal of Archaeological Science: Reports, 28, 102016. doi:https://doi.org/10.1016/j.jasrep.2019.102016
Lukenya	Lukenya			4000 - 8100 BP	Raphicerus campestris	-11.4	-2.4	Browser		Robinson, J. R. (2019). A Holocene paleoenvironmental record based on ungulate stable isotopes from Lukenya Hill, Kenya. Journal of Archaeological Science: Reports, 28, 102016. doi:https://doi.org/10.1016/j.jasrep.2019.102016
Lukenya	Lukenya			4000 - 8100 BP	Redunca fulvorufula	0.3	-3.2	Grazer		Robinson, J. R. (2019). A Holocene paleoenvironmental record based on ungulate stable isotopes from Lukenya Hill, Kenya. Journal of Archaeological Science: Reports, 28, 102016. doi:https://doi.org/10.1016/j.jasrep.2019.102016
Lukenya	Lukenya			4000 - 8100 BP	Redunca fulvorufula	0	-3.2	Grazer		Robinson, J. R. (2019). A Holocene paleoenvironmental record based on ungulate stable isotopes from Lukenya Hill, Kenya. Journal of Archaeological Science: Reports, 28, 102016. doi:https://doi.org/10.1016/j.jasrep.2019.102016
Lukenya	Lukenya			4000 - 8100 BP	Equus quagga	0.5	1.9	Grazer		Robinson, J. R. (2019). A Holocene paleoenvironmental record based on ungulate stable isotopes from Lukenya Hill, Kenya. Journal of Archaeological Science: Reports, 28, 102016. doi:https://doi.org/10.1016/j.jasrep.2019.102016
Lukenya	Lukenya			4000 - 8100 BP	Equus quagga	-1.2	-1	Grazer		Robinson, J. R. (2019). A Holocene paleoenvironmental record based on ungulate stable isotopes from Lukenya Hill, Kenya. Journal of Archaeological Science: Reports, 28, 102016. doi:https://doi.org/10.1016/j.jasrep.2019.102016
Lukenya	Lukenya			4000 - 8100 BP	Potamochoerus porcus	-8.9	-0.4	Omnivore		Robinson, J. R. (2019). A Holocene paleoenvironmental record based on ungulate stable isotopes from Lukenya Hill, Kenya. Journal of Archaeological Science: Reports, 28, 102016. doi:https://doi.org/10.1016/j.jasrep.2019.102016
PYS	PYS	Iron Age	303	1000 - 500 BP	Tragelaphus scriptus	-11.4	-2.3	Browser		Roberts, P., Prendergast, M. E., Janzen, A., Shipton, C., Blinkhorn, J., Zech, J., . . . Boivin, N. (2020). Late Pleistocene to Holocene human palaeoecology in the tropical environments of coastal eastern Africa. Palaeogeography, Palaeoclimatology, Palaeoecology, 537, 109438. doi:https://doi.org/10.1016/j.palaeo.2019.109438
PYS	PYS	Iron Age	305	1000 - 500 BP	Potamochoerus larvatus	-6.8	-4.3	Browser		Roberts, P., Prendergast, M. E., Janzen, A., Shipton, C., Blinkhorn, J., Zech, J., . . . Boivin, N. (2020). Late Pleistocene to Holocene human palaeoecology in the tropical environments of coastal eastern Africa. Palaeogeography, Palaeoclimatology, Palaeoecology, 537, 109438. doi:https://doi.org/10.1016/j.palaeo.2019.109439
PYS	PYS	Iron Age	407	1000 - 500 BP	Sylvicapra grimmia	-11.6	-4.9	Browser		Roberts, P., Prendergast, M. E., Janzen, A., Shipton, C., Blinkhorn, J., Zech, J., . . . Boivin, N. (2020). Late Pleistocene to Holocene human palaeoecology in the tropical environments of coastal eastern Africa. Palaeogeography, Palaeoclimatology, Palaeoecology, 537, 109438. doi:https://doi.org/10.1016/j.palaeo.2019.109440
PYS	PYS	Iron Age	307	1000 - 500 BP	Bovid Size 1-2	-11.2	-3.5	Browser		Roberts, P., Prendergast, M. E., Janzen, A., Shipton, C., Blinkhorn, J., Zech, J., . . . Boivin, N. (2020). Late Pleistocene to Holocene human palaeoecology in the tropical environments of coastal eastern Africa. Palaeogeography, Palaeoclimatology, Palaeoecology, 537, 109438. doi:https://doi.org/10.1016/j.palaeo.2019.109441
PYS	PYS	Iron Age	307	1000 - 500 BP	Bovid Size 1-2	-12.4	-4	Browser		Roberts, P., Prendergast, M. E., Janzen, A., Shipton, C., Blinkhorn, J., Zech, J., . . . Boivin, N. (2020). Late Pleistocene to Holocene human palaeoecology in the tropical environments of coastal eastern Africa. Palaeogeography, Palaeoclimatology, Palaeoecology, 537, 109438. doi:https://doi.org/10.1016/j.palaeo.2019.109442
PYS	PYS	Iron Age	307	1000 - 500 BP	Bovid Size 3-4	3.2	-3.2	Grazer		Roberts, P., Prendergast, M. E., Janzen, A., Shipton, C., Blinkhorn, J., Zech, J., . . . Boivin, N. (2020). Late Pleistocene to Holocene human palaeoecology in the tropical environments of coastal eastern Africa. Palaeogeography, Palaeoclimatology, Palaeoecology, 537, 109438. doi:https://doi.org/10.1016/j.palaeo.2019.109443
PYS	PYS	Iron Age	408	1000 - 500 BP	Sylvicapra grimmia	-11.4	-3.4	Browser		Roberts, P., Prendergast, M. E., Janzen, A., Shipton, C., Blinkhorn, J., Zech, J., . . . Boivin, N. (2020). Late Pleistocene to Holocene human palaeoecology in the tropical environments of coastal eastern Africa. Palaeogeography, Palaeoclimatology, Palaeoecology, 537, 109438. doi:https://doi.org/10.1016/j.palaeo.2019.109444
PYS	PYS	Iron Age	408	1000 - 500 BP	Sylvicapra grimmia	-9.8	-4.1	Browser		Roberts, P., Prendergast, M. E., Janzen, A., Shipton, C., Blinkhorn, J., Zech, J., . . . Boivin, N. (2020). Late Pleistocene to Holocene human palaeoecology in the tropical environments of coastal eastern Africa. Palaeogeography, Palaeoclimatology, Palaeoecology, 537, 109438. doi:https://doi.org/10.1016/j.palaeo.2019.109445
PYS	PYS	Iron Age	408	1000 - 500 BP	Potamochoerus larvatus	-10	-3.5	Browser		Roberts, P., Prendergast, M. E., Janzen, A., Shipton, C., Blinkhorn, J., Zech, J., . . . Boivin, N. (2020). Late Pleistocene to Holocene human palaeoecology in the tropical environments of coastal eastern Africa. Palaeogeography, Palaeoclimatology, Palaeoecology, 537, 109438. doi:https://doi.org/10.1016/j.palaeo.2019.109446
PYS	PYS	Iron Age	408	1000 - 500 BP	Phacochoerus sp.	-0.2	-3.2	Grazer		Roberts, P., Prendergast, M. E., Janzen, A., Shipton, C., Blinkhorn, J., Zech, J., . . . Boivin, N. (2020). Late Pleistocene to Holocene human palaeoecology in the tropical environments of coastal eastern Africa. Palaeogeography, Palaeoclimatology, Palaeoecology, 537, 109438. doi:https://doi.org/10.1016/j.palaeo.2019.109447
PYS	PYS	Iron Age	408	1000 - 500 BP	Bovid Size 3	0.5	-2.4	Grazer		Roberts, P., Prendergast, M. E., Janzen, A., Shipton, C., Blinkhorn, J., Zech, J., . . . Boivin, N. (2020). Late Pleistocene to Holocene human palaeoecology in the tropical environments of coastal eastern Africa. Palaeogeography, Palaeoclimatology, Palaeoecology, 537, 109438. doi:https://doi.org/10.1016/j.palaeo.2019.109448
PYS	PYS	Iron Age	408	1000 - 500 BP	Papio sp.	-11.5	-0.8	Omnivore		Roberts, P., Prendergast, M. E., Janzen, A., Shipton, C., Blinkhorn, J., Zech, J., . . . Boivin, N. (2020). Late Pleistocene to Holocene human palaeoecology in the tropical environments of coastal eastern Africa. Palaeogeography, Palaeoclimatology, Palaeoecology, 537, 109438. doi:https://doi.org/10.1016/j.palaeo.2019.109449
PYS	PYS	Iron Age	408	1000 - 500 BP	Bovid Size 3	-9.8	-4	Browser		Roberts, P., Prendergast, M. E., Janzen, A., Shipton, C., Blinkhorn, J., Zech, J., . . . Boivin, N. (2020). Late Pleistocene to Holocene human palaeoecology in the tropical environments of coastal eastern Africa. Palaeogeography, Palaeoclimatology, Palaeoecology, 537, 109438. doi:https://doi.org/10.1016/j.palaeo.2019.109450
PYS	PYS	Mid-Holocene	310	8500 -7500 BP	Bovid Size 3-4 cf. Bovini	0.6	-3.9	Grazer		Roberts, P., Prendergast, M. E., Janzen, A., Shipton, C., Blinkhorn, J., Zech, J., . . . Boivin, N. (2020). Late Pleistocene to Holocene human palaeoecology in the tropical environments of coastal eastern Africa. Palaeogeography, Palaeoclimatology, Palaeoecology, 537, 109438. doi:https://doi.org/10.1016/j.palaeo.2019.109451
PYS	PYS	Mid-Holocene	310	8500 -7500 BP	Bovid Size 3-4 cf. Bovini	0.1	-4.2	Grazer		Roberts, P., Prendergast, M. E., Janzen, A., Shipton, C., Blinkhorn, J., Zech, J., . . . Boivin, N. (2020). Late Pleistocene to Holocene human palaeoecology in the tropical environments of coastal eastern Africa. Palaeogeography, Palaeoclimatology, Palaeoecology, 537, 109438. doi:https://doi.org/10.1016/j.palaeo.2019.109452
PYS	PYS	Mid-Holocene	410	8500 -7500 BP	Sylvicapra grimmia	-9.8	-4.2	Browser		Roberts, P., Prendergast, M. E., Janzen, A., Shipton, C., Blinkhorn, J., Zech, J., . . . Boivin, N. (2020). Late Pleistocene to Holocene human palaeoecology in the tropical environments of coastal eastern Africa. Palaeogeography, Palaeoclimatology, Palaeoecology, 537, 109438. doi:https://doi.org/10.1016/j.palaeo.2019.109453
PYS	PYS	Mid-Holocene	410	8500 -7500 BP	Neotragini	-10.1	-3.8	Browser		Roberts, P., Prendergast, M. E., Janzen, A., Shipton, C., Blinkhorn, J., Zech, J., . . . Boivin, N. (2020). Late Pleistocene to Holocene human palaeoecology in the tropical environments of coastal eastern Africa. Palaeogeography, Palaeoclimatology, Palaeoecology, 537, 109438. doi:https://doi.org/10.1016/j.palaeo.2019.109454
PYS	PYS	Mid-Holocene	408	8500 -7500 BP	Phacochoerus sp.	-2.8	-2.3	Grazer		Roberts, P., Prendergast, M. E., Janzen, A., Shipton, C., Blinkhorn, J., Zech, J., . . . Boivin, N. (2020). Late Pleistocene to Holocene human palaeoecology in the tropical environments of coastal eastern Africa. Palaeogeography, Palaeoclimatology, Palaeoecology, 537, 109438. doi:https://doi.org/10.1016/j.palaeo.2019.109455
PYS	PYS	Mid-Holocene	410	8500 -7500 BP	Cercopithecinae	-9.9	-3.6	Omnivore		Roberts, P., Prendergast, M. E., Janzen, A., Shipton, C., Blinkhorn, J., Zech, J., . . . Boivin, N. (2020). Late Pleistocene to Holocene human palaeoecology in the tropical environments of coastal eastern Africa. Palaeogeography, Palaeoclimatology, Palaeoecology, 537, 109438. doi:https://doi.org/10.1016/j.palaeo.2019.109456
PYS	PYS	Terminal Pleistocene	310	14000 - 15000 BP	Potamochoerus larvatus	-6.6	-4	Browser		Roberts, P., Prendergast, M. E., Janzen, A., Shipton, C., Blinkhorn, J., Zech, J., . . . Boivin, N. (2020). Late Pleistocene to Holocene human palaeoecology in the tropical environments of coastal eastern Africa. Palaeogeography, Palaeoclimatology, Palaeoecology, 537, 109438. doi:https://doi.org/10.1016/j.palaeo.2019.109457
PYS	PYS	Terminal Pleistocene	310	14000 - 15000 BP	Kobus ellipsiprymnus	0.4	-3.1	Grazer		Roberts, P., Prendergast, M. E., Janzen, A., Shipton, C., Blinkhorn, J., Zech, J., . . . Boivin, N. (2020). Late Pleistocene to Holocene human palaeoecology in the tropical environments of coastal eastern Africa. Palaeogeography, Palaeoclimatology, Palaeoecology, 537, 109438. doi:https://doi.org/10.1016/j.palaeo.2019.109458
PYS	PYS	Terminal Pleistocene	311	14000 - 15000 BP	Ourebia ourebi	-1	-1.6	Grazer		Roberts, P., Prendergast, M. E., Janzen, A., Shipton, C., Blinkhorn, J., Zech, J., . . . Boivin, N. (2020). Late Pleistocene to Holocene human palaeoecology in the tropical environments of coastal eastern Africa. Palaeogeography, Palaeoclimatology, Palaeoecology, 537, 109438. doi:https://doi.org/10.1016/j.palaeo.2019.109459
PYS	PYS	Terminal Pleistocene	311	14000 - 15000 BP	Sylvicapra grimmia	-10.3	-3.1	Browser		Roberts, P., Prendergast, M. E., Janzen, A., Shipton, C., Blinkhorn, J., Zech, J., . . . Boivin, N. (2020). Late Pleistocene to Holocene human palaeoecology in the tropical environments of coastal eastern Africa. Palaeogeography, Palaeoclimatology, Palaeoecology, 537, 109438. doi:https://doi.org/10.1016/j.palaeo.2019.109460
PYS	PYS	Terminal Pleistocene	311	14000 - 15000 BP	Phacochoerus sp.	-2.6	-2.3	Grazer		Roberts, P., Prendergast, M. E., Janzen, A., Shipton, C., Blinkhorn, J., Zech, J., . . . Boivin, N. (2020). Late Pleistocene to Holocene human palaeoecology in the tropical environments of coastal eastern Africa. Palaeogeography, Palaeoclimatology, Palaeoecology, 537, 109438. doi:https://doi.org/10.1016/j.palaeo.2019.109461
PYS	PYS	Terminal Pleistocene	311	14000 - 15000 BP	Phacochoerus sp.	-2.7	-1.7	Grazer		Roberts, P., Prendergast, M. E., Janzen, A., Shipton, C., Blinkhorn, J., Zech, J., . . . Boivin, N. (2020). Late Pleistocene to Holocene human palaeoecology in the tropical environments of coastal eastern Africa. Palaeogeography, Palaeoclimatology, Palaeoecology, 537, 109438. doi:https://doi.org/10.1016/j.palaeo.2019.109462
PYS	PYS	Terminal Pleistocene	311	14000 - 15000 BP	Phacochoerus sp.	-6.9	-8.7	Grazer		Roberts, P., Prendergast, M. E., Janzen, A., Shipton, C., Blinkhorn, J., Zech, J., . . . Boivin, N. (2020). Late Pleistocene to Holocene human palaeoecology in the tropical environments of coastal eastern Africa. Palaeogeography, Palaeoclimatology, Palaeoecology, 537, 109438. doi:https://doi.org/10.1016/j.palaeo.2019.109463
PYS	PYS	Terminal Pleistocene	311	14000 - 15000 BP	Bovid Size 3	-0.4	-1.8	Grazer		Roberts, P., Prendergast, M. E., Janzen, A., Shipton, C., Blinkhorn, J., Zech, J., . . . Boivin, N. (2020). Late Pleistocene to Holocene human palaeoecology in the tropical environments of coastal eastern Africa. Palaeogeography, Palaeoclimatology, Palaeoecology, 537, 109438. doi:https://doi.org/10.1016/j.palaeo.2019.109464
PYS	PYS	Terminal Pleistocene	311	14000 - 15000 BP	Bovid Size 1	-3.1	-2.2	Grazer		Roberts, P., Prendergast, M. E., Janzen, A., Shipton, C., Blinkhorn, J., Zech, J., . . . Boivin, N. (2020). Late Pleistocene to Holocene human palaeoecology in the tropical environments of coastal eastern Africa. Palaeogeography, Palaeoclimatology, Palaeoecology, 537, 109438. doi:https://doi.org/10.1016/j.palaeo.2019.109465
PYS	PYS	Terminal Pleistocene	411	14000 - 15000 BP	Potamochoerus larvatus	-11	-5.1	Browser		Roberts, P., Prendergast, M. E., Janzen, A., Shipton, C., Blinkhorn, J., Zech, J., . . . Boivin, N. (2020). Late Pleistocene to Holocene human palaeoecology in the tropical environments of coastal eastern Africa. Palaeogeography, Palaeoclimatology, Palaeoecology, 537, 109438. doi:https://doi.org/10.1016/j.palaeo.2019.109466
PYS	PYS	Terminal Pleistocene	411	14000 - 15000 BP	Neotragini	-11	-3.5	Browser		Roberts, P., Prendergast, M. E., Janzen, A., Shipton, C., Blinkhorn, J., Zech, J., . . . Boivin, N. (2020). Late Pleistocene to Holocene human palaeoecology in the tropical environments of coastal eastern Africa. Palaeogeography, Palaeoclimatology, Palaeoecology, 537, 109438. doi:https://doi.org/10.1016/j.palaeo.2019.109467
PYS	PYS	Terminal Pleistocene	411	14000 - 15000 BP	Neotragini	-11.4	-3.1	Browser		Roberts, P., Prendergast, M. E., Janzen, A., Shipton, C., Blinkhorn, J., Zech, J., . . . Boivin, N. (2020). Late Pleistocene to Holocene human palaeoecology in the tropical environments of coastal eastern Africa. Palaeogeography, Palaeoclimatology, Palaeoecology, 537, 109438. doi:https://doi.org/10.1016/j.palaeo.2019.109468
PYS	PYS	Terminal Pleistocene	411	14000 - 15000 BP	Sylvicapra grimmia	-11.5	-4.2	Browser		Roberts, P., Prendergast, M. E., Janzen, A., Shipton, C., Blinkhorn, J., Zech, J., . . . Boivin, N. (2020). Late Pleistocene to Holocene human palaeoecology in the tropical environments of coastal eastern Africa. Palaeogeography, Palaeoclimatology, Palaeoecology, 537, 109438. doi:https://doi.org/10.1016/j.palaeo.2019.109469
PYS	PYS	Terminal Pleistocene	411	14000 - 15000 BP	Potamochoerus larvatus	-10.1	-4.6	Browser		Roberts, P., Prendergast, M. E., Janzen, A., Shipton, C., Blinkhorn, J., Zech, J., . . . Boivin, N. (2020). Late Pleistocene to Holocene human palaeoecology in the tropical environments of coastal eastern Africa. Palaeogeography, Palaeoclimatology, Palaeoecology, 537, 109438. doi:https://doi.org/10.1016/j.palaeo.2019.109470
PYS	PYS	Terminal Pleistocene	411	14000 - 15000 BP	Phacochoerus sp.	-1.1	-3.6	Grazer		Roberts, P., Prendergast, M. E., Janzen, A., Shipton, C., Blinkhorn, J., Zech, J., . . . Boivin, N. (2020). Late Pleistocene to Holocene human palaeoecology in the tropical environments of coastal eastern Africa. Palaeogeography, Palaeoclimatology, Palaeoecology, 537, 109438. doi:https://doi.org/10.1016/j.palaeo.2019.109471
PYS	PYS	Terminal Pleistocene	411	14000 - 15000 BP	Phacochoerus sp.	-0.7	-1.3	Grazer		Roberts, P., Prendergast, M. E., Janzen, A., Shipton, C., Blinkhorn, J., Zech, J., . . . Boivin, N. (2020). Late Pleistocene to Holocene human palaeoecology in the tropical environments of coastal eastern Africa. Palaeogeography, Palaeoclimatology, Palaeoecology, 537, 109438. doi:https://doi.org/10.1016/j.palaeo.2019.109472
PYS	PYS	Terminal Pleistocene	411	14000 - 15000 BP	Kobus ellipsiprymnus	0.3	-1.6	Grazer		Roberts, P., Prendergast, M. E., Janzen, A., Shipton, C., Blinkhorn, J., Zech, J., . . . Boivin, N. (2020). Late Pleistocene to Holocene human palaeoecology in the tropical environments of coastal eastern Africa. Palaeogeography, Palaeoclimatology, Palaeoecology, 537, 109438. doi:https://doi.org/10.1016/j.palaeo.2019.109473
PYS	PYS	Terminal Pleistocene	411	14000 - 15000 BP	Phacochoerus sp.	2.1	-0.4	Grazer		Roberts, P., Prendergast, M. E., Janzen, A., Shipton, C., Blinkhorn, J., Zech, J., . . . Boivin, N. (2020). Late Pleistocene to Holocene human palaeoecology in the tropical environments of coastal eastern Africa. Palaeogeography, Palaeoclimatology, Palaeoecology, 537, 109438. doi:https://doi.org/10.1016/j.palaeo.2019.109474
PYS	PYS	Terminal Pleistocene	411	14000 - 15000 BP	Phacochoerus sp.	-2.9	-2.4	Grazer		Roberts, P., Prendergast, M. E., Janzen, A., Shipton, C., Blinkhorn, J., Zech, J., . . . Boivin, N. (2020). Late Pleistocene to Holocene human palaeoecology in the tropical environments of coastal eastern Africa. Palaeogeography, Palaeoclimatology, Palaeoecology, 537, 109438. doi:https://doi.org/10.1016/j.palaeo.2019.109475
PYS	PYS	Terminal Pleistocene	411	14000 - 15000 BP	Colobus or large cercopithecine	-11.6	-3.7	Browser		Roberts, P., Prendergast, M. E., Janzen, A., Shipton, C., Blinkhorn, J., Zech, J., . . . Boivin, N. (2020). Late Pleistocene to Holocene human palaeoecology in the tropical environments of coastal eastern Africa. Palaeogeography, Palaeoclimatology, Palaeoecology, 537, 109438. doi:https://doi.org/10.1016/j.palaeo.2019.109476
PYS	PYS	Terminal Pleistocene	411	14000 - 15000 BP	Colobus or large cercopithecine	-12	-2.2	Browser		Roberts, P., Prendergast, M. E., Janzen, A., Shipton, C., Blinkhorn, J., Zech, J., . . . Boivin, N. (2020). Late Pleistocene to Holocene human palaeoecology in the tropical environments of coastal eastern Africa. Palaeogeography, Palaeoclimatology, Palaeoecology, 537, 109438. doi:https://doi.org/10.1016/j.palaeo.2019.109477
PYS	PYS	Terminal Pleistocene	411	14000 - 15000 BP	Bovid Size 3	-0.8	-2	Grazer		Roberts, P., Prendergast, M. E., Janzen, A., Shipton, C., Blinkhorn, J., Zech, J., . . . Boivin, N. (2020). Late Pleistocene to Holocene human palaeoecology in the tropical environments of coastal eastern Africa. Palaeogeography, Palaeoclimatology, Palaeoecology, 537, 109438. doi:https://doi.org/10.1016/j.palaeo.2019.109478
PYS	PYS	Terminal Pleistocene	411	14000 - 15000 BP	Bovid Size 3	2.4	0.1	Grazer		Roberts, P., Prendergast, M. E., Janzen, A., Shipton, C., Blinkhorn, J., Zech, J., . . . Boivin, N. (2020). Late Pleistocene to Holocene human palaeoecology in the tropical environments of coastal eastern Africa. Palaeogeography, Palaeoclimatology, Palaeoecology, 537, 109438. doi:https://doi.org/10.1016/j.palaeo.2019.109479
PYS	PYS	Terminal Pleistocene	411	14000 - 15000 BP	Bovid Size 3	-5.2	-2.7	Grazer		Roberts, P., Prendergast, M. E., Janzen, A., Shipton, C., Blinkhorn, J., Zech, J., . . . Boivin, N. (2020). Late Pleistocene to Holocene human palaeoecology in the tropical environments of coastal eastern Africa. Palaeogeography, Palaeoclimatology, Palaeoecology, 537, 109438. doi:https://doi.org/10.1016/j.palaeo.2019.109480
PYS	PYS	LGM	311	25000-20000 BP	Kobus ellipsiprymnus	0.7	-1.9	Grazer		Roberts, P., Prendergast, M. E., Janzen, A., Shipton, C., Blinkhorn, J., Zech, J., . . . Boivin, N. (2020). Late Pleistocene to Holocene human palaeoecology in the tropical environments of coastal eastern Africa. Palaeogeography, Palaeoclimatology, Palaeoecology, 537, 109438. doi:https://doi.org/10.1016/j.palaeo.2019.109481
PYS	PYS	LGM	412	25000-20000 BP	Bovid Size 1	-2.1	-4.7	Grazer		Roberts, P., Prendergast, M. E., Janzen, A., Shipton, C., Blinkhorn, J., Zech, J., . . . Boivin, N. (2020). Late Pleistocene to Holocene human palaeoecology in the tropical environments of coastal eastern Africa. Palaeogeography, Palaeoclimatology, Palaeoecology, 537, 109438. doi:https://doi.org/10.1016/j.palaeo.2019.109482
PYS	PYS	LGM	412	25000-20000 BP	Alcelaphus/Damaliscus	0.2	-1	Grazer		Roberts, P., Prendergast, M. E., Janzen, A., Shipton, C., Blinkhorn, J., Zech, J., . . . Boivin, N. (2020). Late Pleistocene to Holocene human palaeoecology in the tropical environments of coastal eastern Africa. Palaeogeography, Palaeoclimatology, Palaeoecology, 537, 109438. doi:https://doi.org/10.1016/j.palaeo.2019.109483
PYS	PYS	LGM	412	25000-20000 BP	Bovid Size 2	-11.3	-2.9	Browser		Roberts, P., Prendergast, M. E., Janzen, A., Shipton, C., Blinkhorn, J., Zech, J., . . . Boivin, N. (2020). Late Pleistocene to Holocene human palaeoecology in the tropical environments of coastal eastern Africa. Palaeogeography, Palaeoclimatology, Palaeoecology, 537, 109438. doi:https://doi.org/10.1016/j.palaeo.2019.109484
PYS	PYS	Late MIS3	413	325000 - 33500 BP	Bovid Size 3	0.5	-0.7	Grazer		Roberts, P., Prendergast, M. E., Janzen, A., Shipton, C., Blinkhorn, J., Zech, J., . . . Boivin, N. (2020). Late Pleistocene to Holocene human palaeoecology in the tropical environments of coastal eastern Africa. Palaeogeography, Palaeoclimatology, Palaeoecology, 537, 109438. doi:https://doi.org/10.1016/j.palaeo.2019.109485
PYS	PYS	Late MIS3	413	325000 - 33500 BP	Sylvicapra grimmia	-10.6	-2.8	Browser		Roberts, P., Prendergast, M. E., Janzen, A., Shipton, C., Blinkhorn, J., Zech, J., . . . Boivin, N. (2020). Late Pleistocene to Holocene human palaeoecology in the tropical environments of coastal eastern Africa. Palaeogeography, Palaeoclimatology, Palaeoecology, 537, 109438. doi:https://doi.org/10.1016/j.palaeo.2019.109486
PYS	PYS	Late MIS3	413	325000 - 33500 BP	Phacochoerus sp.	-2	-0.6	Grazer		Roberts, P., Prendergast, M. E., Janzen, A., Shipton, C., Blinkhorn, J., Zech, J., . . . Boivin, N. (2020). Late Pleistocene to Holocene human palaeoecology in the tropical environments of coastal eastern Africa. Palaeogeography, Palaeoclimatology, Palaeoecology, 537, 109438. doi:https://doi.org/10.1016/j.palaeo.2019.109487
PYS	PYS	Late MIS3	413	325000 - 33500 BP	Kobus ellipsiprymnus	-0.3	-2.4	Grazer		Roberts, P., Prendergast, M. E., Janzen, A., Shipton, C., Blinkhorn, J., Zech, J., . . . Boivin, N. (2020). Late Pleistocene to Holocene human palaeoecology in the tropical environments of coastal eastern Africa. Palaeogeography, Palaeoclimatology, Palaeoecology, 537, 109438. doi:https://doi.org/10.1016/j.palaeo.2019.109488
PYS	PYS	Late MIS3	413	325000 - 33500 BP	Phacochoerus sp.	0.9	-0.8	Grazer		Roberts, P., Prendergast, M. E., Janzen, A., Shipton, C., Blinkhorn, J., Zech, J., . . . Boivin, N. (2020). Late Pleistocene to Holocene human palaeoecology in the tropical environments of coastal eastern Africa. Palaeogeography, Palaeoclimatology, Palaeoecology, 537, 109438. doi:https://doi.org/10.1016/j.palaeo.2019.109489
PYS	PYS	Late MIS3	413	325000 - 33500 BP	Colobus sp.	-11.2	-3.1	Browser		Roberts, P., Prendergast, M. E., Janzen, A., Shipton, C., Blinkhorn, J., Zech, J., . . . Boivin, N. (2020). Late Pleistocene to Holocene human palaeoecology in the tropical environments of coastal eastern Africa. Palaeogeography, Palaeoclimatology, Palaeoecology, 537, 109438. doi:https://doi.org/10.1016/j.palaeo.2019.109490
PYS	PYS	Late MIS3	311	325000 - 33500 BP	Phacochoerus sp.	-1.8	-4.9	Grazer		Roberts, P., Prendergast, M. E., Janzen, A., Shipton, C., Blinkhorn, J., Zech, J., . . . Boivin, N. (2020). Late Pleistocene to Holocene human palaeoecology in the tropical environments of coastal eastern Africa. Palaeogeography, Palaeoclimatology, Palaeoecology, 537, 109438. doi:https://doi.org/10.1016/j.palaeo.2019.109491
PYS	PYS	Late MIS3	311	325000 - 33500 BP	Phacochoerus sp.	0.4	-1.2	Grazer		Roberts, P., Prendergast, M. E., Janzen, A., Shipton, C., Blinkhorn, J., Zech, J., . . . Boivin, N. (2020). Late Pleistocene to Holocene human palaeoecology in the tropical environments of coastal eastern Africa. Palaeogeography, Palaeoclimatology, Palaeoecology, 537, 109438. doi:https://doi.org/10.1016/j.palaeo.2019.109492
PYS	PYS	Late MIS3	311	325000 - 33500 BP	Phacochoerus sp.	1.5	-0.7	Grazer		Roberts, P., Prendergast, M. E., Janzen, A., Shipton, C., Blinkhorn, J., Zech, J., . . . Boivin, N. (2020). Late Pleistocene to Holocene human palaeoecology in the tropical environments of coastal eastern Africa. Palaeogeography, Palaeoclimatology, Palaeoecology, 537, 109438. doi:https://doi.org/10.1016/j.palaeo.2019.109493
PYS	PYS	Mid MIS3	313	48000 - 49000 BP	Ourebia ourebi	0.2	-1.6	Grazer		Roberts, P., Prendergast, M. E., Janzen, A., Shipton, C., Blinkhorn, J., Zech, J., . . . Boivin, N. (2020). Late Pleistocene to Holocene human palaeoecology in the tropical environments of coastal eastern Africa. Palaeogeography, Palaeoclimatology, Palaeoecology, 537, 109438. doi:https://doi.org/10.1016/j.palaeo.2019.109494
PYS	PYS	Mid MIS3	313	48000 - 49000 BP	Ourebia ourebi	-3.7	-2.4	Grazer		Roberts, P., Prendergast, M. E., Janzen, A., Shipton, C., Blinkhorn, J., Zech, J., . . . Boivin, N. (2020). Late Pleistocene to Holocene human palaeoecology in the tropical environments of coastal eastern Africa. Palaeogeography, Palaeoclimatology, Palaeoecology, 537, 109438. doi:https://doi.org/10.1016/j.palaeo.2019.109495
PYS	PYS	Mid MIS3	414	48000 - 49000 BP	Cephalophini, small	-10.2	-3.6	Browser		Roberts, P., Prendergast, M. E., Janzen, A., Shipton, C., Blinkhorn, J., Zech, J., . . . Boivin, N. (2020). Late Pleistocene to Holocene human palaeoecology in the tropical environments of coastal eastern Africa. Palaeogeography, Palaeoclimatology, Palaeoecology, 537, 109438. doi:https://doi.org/10.1016/j.palaeo.2019.109496
PYS	PYS	Mid MIS3	414	48000 - 49000 BP	Phacochoerus sp.	-2	-0.9	Grazer		Roberts, P., Prendergast, M. E., Janzen, A., Shipton, C., Blinkhorn, J., Zech, J., . . . Boivin, N. (2020). Late Pleistocene to Holocene human palaeoecology in the tropical environments of coastal eastern Africa. Palaeogeography, Palaeoclimatology, Palaeoecology, 537, 109438. doi:https://doi.org/10.1016/j.palaeo.2019.109497
PYS	PYS	Mid MIS3	414	48000 - 49000 BP	Phacochoerus sp.	-0.9	0.1	Grazer		Roberts, P., Prendergast, M. E., Janzen, A., Shipton, C., Blinkhorn, J., Zech, J., . . . Boivin, N. (2020). Late Pleistocene to Holocene human palaeoecology in the tropical environments of coastal eastern Africa. Palaeogeography, Palaeoclimatology, Palaeoecology, 537, 109438. doi:https://doi.org/10.1016/j.palaeo.2019.109498
PYS	PYS	Mid MIS3	414	48000 - 49000 BP	Alcelaphus/Damaliscus	-2.2	-1	Grazer		Roberts, P., Prendergast, M. E., Janzen, A., Shipton, C., Blinkhorn, J., Zech, J., . . . Boivin, N. (2020). Late Pleistocene to Holocene human palaeoecology in the tropical environments of coastal eastern Africa. Palaeogeography, Palaeoclimatology, Palaeoecology, 537, 109438. doi:https://doi.org/10.1016/j.palaeo.2019.109499
PYS	PYS	Mid MIS3	414	48000 - 49000 BP	Kobus ellipsiprymnus	2.6	0.1	Grazer		Roberts, P., Prendergast, M. E., Janzen, A., Shipton, C., Blinkhorn, J., Zech, J., . . . Boivin, N. (2020). Late Pleistocene to Holocene human palaeoecology in the tropical environments of coastal eastern Africa. Palaeogeography, Palaeoclimatology, Palaeoecology, 537, 109438. doi:https://doi.org/10.1016/j.palaeo.2019.109500
PYS	PYS	Mid MIS3	414	48000 - 49000 BP	Alcelaphus/Damaliscus	1.6	-0.5	Grazer		Roberts, P., Prendergast, M. E., Janzen, A., Shipton, C., Blinkhorn, J., Zech, J., . . . Boivin, N. (2020). Late Pleistocene to Holocene human palaeoecology in the tropical environments of coastal eastern Africa. Palaeogeography, Palaeoclimatology, Palaeoecology, 537, 109438. doi:https://doi.org/10.1016/j.palaeo.2019.109501
PYS	PYS	Mid MIS3	414	48000 - 49000 BP	Papio sp.	-9.2	0.1	Omnivore		Roberts, P., Prendergast, M. E., Janzen, A., Shipton, C., Blinkhorn, J., Zech, J., . . . Boivin, N. (2020). Late Pleistocene to Holocene human palaeoecology in the tropical environments of coastal eastern Africa. Palaeogeography, Palaeoclimatology, Palaeoecology, 537, 109438. doi:https://doi.org/10.1016/j.palaeo.2019.109502
PYS	PYS	Mid MIS3	313	48000 - 49000 BP	Bovid Size 1	-4.6	-3.2	Grazer		Roberts, P., Prendergast, M. E., Janzen, A., Shipton, C., Blinkhorn, J., Zech, J., . . . Boivin, N. (2020). Late Pleistocene to Holocene human palaeoecology in the tropical environments of coastal eastern Africa. Palaeogeography, Palaeoclimatology, Palaeoecology, 537, 109438. doi:https://doi.org/10.1016/j.palaeo.2019.109503
PYS	PYS	Mid MIS3	313	48000 - 49000 BP	Papio sp.	-9.3	-1.8	Omnivore		Roberts, P., Prendergast, M. E., Janzen, A., Shipton, C., Blinkhorn, J., Zech, J., . . . Boivin, N. (2020). Late Pleistocene to Holocene human palaeoecology in the tropical environments of coastal eastern Africa. Palaeogeography, Palaeoclimatology, Palaeoecology, 537, 109438. doi:https://doi.org/10.1016/j.palaeo.2019.109504
PYS	PYS	Early MIS3	415	48000 - 49000 BP	Ourebia ourebi	-0.2	-2.4	Grazer		Roberts, P., Prendergast, M. E., Janzen, A., Shipton, C., Blinkhorn, J., Zech, J., . . . Boivin, N. (2020). Late Pleistocene to Holocene human palaeoecology in the tropical environments of coastal eastern Africa. Palaeogeography, Palaeoclimatology, Palaeoecology, 537, 109438. doi:https://doi.org/10.1016/j.palaeo.2019.109505
PYS	PYS	Early MIS3	415	48000 - 49000 BP	Bovid Size 1	0.8	-2.3	Grazer		Roberts, P., Prendergast, M. E., Janzen, A., Shipton, C., Blinkhorn, J., Zech, J., . . . Boivin, N. (2020). Late Pleistocene to Holocene human palaeoecology in the tropical environments of coastal eastern Africa. Palaeogeography, Palaeoclimatology, Palaeoecology, 537, 109438. doi:https://doi.org/10.1016/j.palaeo.2019.109506
PYS	PYS	Early MIS3	415	48000 - 49000 BP	Large tragelaphine (eland or greater kudu)	-7.1	-0.5	Browser		Roberts, P., Prendergast, M. E., Janzen, A., Shipton, C., Blinkhorn, J., Zech, J., . . . Boivin, N. (2020). Late Pleistocene to Holocene human palaeoecology in the tropical environments of coastal eastern Africa. Palaeogeography, Palaeoclimatology, Palaeoecology, 537, 109438. doi:https://doi.org/10.1016/j.palaeo.2019.109507
PYS	PYS	Early MIS3	415	48000 - 49000 BP	Large tragelaphine (eland or greater kudu)	-6.8	0.3	Browser		Roberts, P., Prendergast, M. E., Janzen, A., Shipton, C., Blinkhorn, J., Zech, J., . . . Boivin, N. (2020). Late Pleistocene to Holocene human palaeoecology in the tropical environments of coastal eastern Africa. Palaeogeography, Palaeoclimatology, Palaeoecology, 537, 109438. doi:https://doi.org/10.1016/j.palaeo.2019.109508
PYS	PYS	Early MIS3	415	48000 - 49000 BP	Large tragelaphine (eland or greater kudu)	-6.3	0.1	Browser		Roberts, P., Prendergast, M. E., Janzen, A., Shipton, C., Blinkhorn, J., Zech, J., . . . Boivin, N. (2020). Late Pleistocene to Holocene human palaeoecology in the tropical environments of coastal eastern Africa. Palaeogeography, Palaeoclimatology, Palaeoecology, 537, 109438. doi:https://doi.org/10.1016/j.palaeo.2019.109509
PYS	PYS	Early MIS3	313	48000 - 49000 BP	Kobus ellipsiprymnus	3.3	0.2	Grazer		Roberts, P., Prendergast, M. E., Janzen, A., Shipton, C., Blinkhorn, J., Zech, J., . . . Boivin, N. (2020). Late Pleistocene to Holocene human palaeoecology in the tropical environments of coastal eastern Africa. Palaeogeography, Palaeoclimatology, Palaeoecology, 537, 109438. doi:https://doi.org/10.1016/j.palaeo.2019.109510
PYS	PYS	Early MIS3	313	48000 - 49000 BP	Kobus ellipsiprymnus	1.3	-0.6	Grazer		Roberts, P., Prendergast, M. E., Janzen, A., Shipton, C., Blinkhorn, J., Zech, J., . . . Boivin, N. (2020). Late Pleistocene to Holocene human palaeoecology in the tropical environments of coastal eastern Africa. Palaeogeography, Palaeoclimatology, Palaeoecology, 537, 109438. doi:https://doi.org/10.1016/j.palaeo.2019.109511
PYS	PYS	Early MIS3	415	48000 - 49000 BP	Phacochoerus sp.	-2.3	-3	Grazer		Roberts, P., Prendergast, M. E., Janzen, A., Shipton, C., Blinkhorn, J., Zech, J., . . . Boivin, N. (2020). Late Pleistocene to Holocene human palaeoecology in the tropical environments of coastal eastern Africa. Palaeogeography, Palaeoclimatology, Palaeoecology, 537, 109438. doi:https://doi.org/10.1016/j.palaeo.2019.109512
PYS	PYS	Early MIS3	415	48000 - 49000 BP	Phacochoerus sp.	-3.5	-0.7	Grazer		Roberts, P., Prendergast, M. E., Janzen, A., Shipton, C., Blinkhorn, J., Zech, J., . . . Boivin, N. (2020). Late Pleistocene to Holocene human palaeoecology in the tropical environments of coastal eastern Africa. Palaeogeography, Palaeoclimatology, Palaeoecology, 537, 109438. doi:https://doi.org/10.1016/j.palaeo.2019.109513
PYS	PYS	Early MIS3	415	48000 - 49000 BP	Alcelaphus/Damaliscus	3.4	-0.7	Grazer		Roberts, P., Prendergast, M. E., Janzen, A., Shipton, C., Blinkhorn, J., Zech, J., . . . Boivin, N. (2020). Late Pleistocene to Holocene human palaeoecology in the tropical environments of coastal eastern Africa. Palaeogeography, Palaeoclimatology, Palaeoecology, 537, 109438. doi:https://doi.org/10.1016/j.palaeo.2019.109514
PYS	PYS	Early MIS3	415	48000 - 49000 BP	Syncerus caffer	2.3	-2.2	Grazer		Roberts, P., Prendergast, M. E., Janzen, A., Shipton, C., Blinkhorn, J., Zech, J., . . . Boivin, N. (2020). Late Pleistocene to Holocene human palaeoecology in the tropical environments of coastal eastern Africa. Palaeogeography, Palaeoclimatology, Palaeoecology, 537, 109438. doi:https://doi.org/10.1016/j.palaeo.2019.109515
PYS	PYS	Early MIS3	415	48000 - 49000 BP	Bovid Size 3 Alcelaphini	1.9	-0.6	Grazer		Roberts, P., Prendergast, M. E., Janzen, A., Shipton, C., Blinkhorn, J., Zech, J., . . . Boivin, N. (2020). Late Pleistocene to Holocene human palaeoecology in the tropical environments of coastal eastern Africa. Palaeogeography, Palaeoclimatology, Palaeoecology, 537, 109438. doi:https://doi.org/10.1016/j.palaeo.2019.109516
PYS	PYS	Early MIS3	415	48000 - 49000 BP	Alcelaphus/Damaliscus	-4.2	-1.6	Grazer		Roberts, P., Prendergast, M. E., Janzen, A., Shipton, C., Blinkhorn, J., Zech, J., . . . Boivin, N. (2020). Late Pleistocene to Holocene human palaeoecology in the tropical environments of coastal eastern Africa. Palaeogeography, Palaeoclimatology, Palaeoecology, 537, 109438. doi:https://doi.org/10.1016/j.palaeo.2019.109517
PYS	PYS	Early MIS3	415	48000 - 49000 BP	Alcelaphus/Damaliscus	-2.2	-1.3	Grazer		Roberts, P., Prendergast, M. E., Janzen, A., Shipton, C., Blinkhorn, J., Zech, J., . . . Boivin, N. (2020). Late Pleistocene to Holocene human palaeoecology in the tropical environments of coastal eastern Africa. Palaeogeography, Palaeoclimatology, Palaeoecology, 537, 109438. doi:https://doi.org/10.1016/j.palaeo.2019.109518
PYS	PYS	Early MIS3	415	48000 - 49000 BP	Alcelaphus/Damaliscus	1.1	-1.9	Grazer		Roberts, P., Prendergast, M. E., Janzen, A., Shipton, C., Blinkhorn, J., Zech, J., . . . Boivin, N. (2020). Late Pleistocene to Holocene human palaeoecology in the tropical environments of coastal eastern Africa. Palaeogeography, Palaeoclimatology, Palaeoecology, 537, 109438. doi:https://doi.org/10.1016/j.palaeo.2019.109519
PYS	PYS	Early MIS3	415	48000 - 49000 BP	Alcelaphus/Damaliscus	2.7	-1.7	Grazer		Roberts, P., Prendergast, M. E., Janzen, A., Shipton, C., Blinkhorn, J., Zech, J., . . . Boivin, N. (2020). Late Pleistocene to Holocene human palaeoecology in the tropical environments of coastal eastern Africa. Palaeogeography, Palaeoclimatology, Palaeoecology, 537, 109438. doi:https://doi.org/10.1016/j.palaeo.2019.109520
PYS	PYS	Early MIS3	313	48000 - 49000 BP	Bovid Size 3	1.8	-0.6	Grazer		Roberts, P., Prendergast, M. E., Janzen, A., Shipton, C., Blinkhorn, J., Zech, J., . . . Boivin, N. (2020). Late Pleistocene to Holocene human palaeoecology in the tropical environments of coastal eastern Africa. Palaeogeography, Palaeoclimatology, Palaeoecology, 537, 109438. doi:https://doi.org/10.1016/j.palaeo.2019.109521
PYS	PYS	Early MIS3	313	48000 - 49000 BP	Bovid Size 2	0.3	0.2	Grazer		Roberts, P., Prendergast, M. E., Janzen, A., Shipton, C., Blinkhorn, J., Zech, J., . . . Boivin, N. (2020). Late Pleistocene to Holocene human palaeoecology in the tropical environments of coastal eastern Africa. Palaeogeography, Palaeoclimatology, Palaeoecology, 537, 109438. doi:https://doi.org/10.1016/j.palaeo.2019.109522
PYS	PYS	Early MIS3	415	48000 - 49000 BP	Papio sp.	-10.7	-3.3	Omnivore		Roberts, P., Prendergast, M. E., Janzen, A., Shipton, C., Blinkhorn, J., Zech, J., . . . Boivin, N. (2020). Late Pleistocene to Holocene human palaeoecology in the tropical environments of coastal eastern Africa. Palaeogeography, Palaeoclimatology, Palaeoecology, 537, 109438. doi:https://doi.org/10.1016/j.palaeo.2019.109523
PYS	PYS	Early MIS3	415	48000 - 49000 BP	Papio sp.	-10.8	-2.4	Omnivore		Roberts, P., Prendergast, M. E., Janzen, A., Shipton, C., Blinkhorn, J., Zech, J., . . . Boivin, N. (2020). Late Pleistocene to Holocene human palaeoecology in the tropical environments of coastal eastern Africa. Palaeogeography, Palaeoclimatology, Palaeoecology, 537, 109438. doi:https://doi.org/10.1016/j.palaeo.2019.109524
PYS	PYS	Early MIS3	415	48000 - 49000 BP	Bovid Size 2	-1.8	-1.2	N/A		Roberts, P., Prendergast, M. E., Janzen, A., Shipton, C., Blinkhorn, J., Zech, J., . . . Boivin, N. (2020). Late Pleistocene to Holocene human palaeoecology in the tropical environments of coastal eastern Africa. Palaeogeography, Palaeoclimatology, Palaeoecology, 537, 109438. doi:https://doi.org/10.1016/j.palaeo.2019.109525
PYS	PYS	Early MIS3	314	48000 - 49000 BP	Bovid Size 3 Alcelaphini	-6.8	-3.6	Grazer		Roberts, P., Prendergast, M. E., Janzen, A., Shipton, C., Blinkhorn, J., Zech, J., . . . Boivin, N. (2020). Late Pleistocene to Holocene human palaeoecology in the tropical environments of coastal eastern Africa. Palaeogeography, Palaeoclimatology, Palaeoecology, 537, 109438. doi:https://doi.org/10.1016/j.palaeo.2019.109526
PYS	PYS	Early MIS3	416	48000 - 49000 BP	Phacochoerus sp.	-0.2	-1.6	Grazer		Roberts, P., Prendergast, M. E., Janzen, A., Shipton, C., Blinkhorn, J., Zech, J., . . . Boivin, N. (2020). Late Pleistocene to Holocene human palaeoecology in the tropical environments of coastal eastern Africa. Palaeogeography, Palaeoclimatology, Palaeoecology, 537, 109438. doi:https://doi.org/10.1016/j.palaeo.2019.109527
PYS	PYS	Early MIS3	416	48000 - 49000 BP	Phacochoerus sp.	0.4	-2.5	Grazer		Roberts, P., Prendergast, M. E., Janzen, A., Shipton, C., Blinkhorn, J., Zech, J., . . . Boivin, N. (2020). Late Pleistocene to Holocene human palaeoecology in the tropical environments of coastal eastern Africa. Palaeogeography, Palaeoclimatology, Palaeoecology, 537, 109438. doi:https://doi.org/10.1016/j.palaeo.2019.109528
PYS	PYS	Early MIS3	416	48000 - 49000 BP	Connochaetes taurinus	-0.9	-1.2	Grazer		Roberts, P., Prendergast, M. E., Janzen, A., Shipton, C., Blinkhorn, J., Zech, J., . . . Boivin, N. (2020). Late Pleistocene to Holocene human palaeoecology in the tropical environments of coastal eastern Africa. Palaeogeography, Palaeoclimatology, Palaeoecology, 537, 109438. doi:https://doi.org/10.1016/j.palaeo.2019.109529
PYS	PYS	Early MIS3	416	48000 - 49000 BP	Bovid Size 3	-1.3	-4.5	Grazer		Roberts, P., Prendergast, M. E., Janzen, A., Shipton, C., Blinkhorn, J., Zech, J., . . . Boivin, N. (2020). Late Pleistocene to Holocene human palaeoecology in the tropical environments of coastal eastern Africa. Palaeogeography, Palaeoclimatology, Palaeoecology, 537, 109438. doi:https://doi.org/10.1016/j.palaeo.2019.109530
PYS	PYS	MIS4	802	68000 - 60000 BP	Potamochoerus larvatus	-3.7	-2.5	Grazer		Roberts, P., Prendergast, M. E., Janzen, A., Shipton, C., Blinkhorn, J., Zech, J., . . . Boivin, N. (2020). Late Pleistocene to Holocene human palaeoecology in the tropical environments of coastal eastern Africa. Palaeogeography, Palaeoclimatology, Palaeoecology, 537, 109438. doi:https://doi.org/10.1016/j.palaeo.2019.109531
PYS	PYS	MIS4	802	68000 - 60000 BP	Potamochoerus larvatus	-4.4	-10.7	Browser		Roberts, P., Prendergast, M. E., Janzen, A., Shipton, C., Blinkhorn, J., Zech, J., . . . Boivin, N. (2020). Late Pleistocene to Holocene human palaeoecology in the tropical environments of coastal eastern Africa. Palaeogeography, Palaeoclimatology, Palaeoecology, 537, 109438. doi:https://doi.org/10.1016/j.palaeo.2019.109532
PYS	PYS	MIS4	417	68000 - 60000 BP	Kobus ellipsiprymnus	1.1	0.8	Grazer		Roberts, P., Prendergast, M. E., Janzen, A., Shipton, C., Blinkhorn, J., Zech, J., . . . Boivin, N. (2020). Late Pleistocene to Holocene human palaeoecology in the tropical environments of coastal eastern Africa. Palaeogeography, Palaeoclimatology, Palaeoecology, 537, 109438. doi:https://doi.org/10.1016/j.palaeo.2019.109533
PYS	PYS	MIS4	802	68000 - 60000 BP	Phacochoerus sp.	-2.7	-2.7	Grazer		Roberts, P., Prendergast, M. E., Janzen, A., Shipton, C., Blinkhorn, J., Zech, J., . . . Boivin, N. (2020). Late Pleistocene to Holocene human palaeoecology in the tropical environments of coastal eastern Africa. Palaeogeography, Palaeoclimatology, Palaeoecology, 537, 109438. doi:https://doi.org/10.1016/j.palaeo.2019.109534
PYS	PYS	MIS4	315	68000 - 60000 BP	Suid	-5.6	-6.5	Browser		Roberts, P., Prendergast, M. E., Janzen, A., Shipton, C., Blinkhorn, J., Zech, J., . . . Boivin, N. (2020). Late Pleistocene to Holocene human palaeoecology in the tropical environments of coastal eastern Africa. Palaeogeography, Palaeoclimatology, Palaeoecology, 537, 109438. doi:https://doi.org/10.1016/j.palaeo.2019.109535
PYS	PYS	MIS4	802	68000 - 60000 BP	Bovid Size 2	-0.3	-1.5	Grazer		Roberts, P., Prendergast, M. E., Janzen, A., Shipton, C., Blinkhorn, J., Zech, J., . . . Boivin, N. (2020). Late Pleistocene to Holocene human palaeoecology in the tropical environments of coastal eastern Africa. Palaeogeography, Palaeoclimatology, Palaeoecology, 537, 109438. doi:https://doi.org/10.1016/j.palaeo.2019.109536
PYS	PYS	MIS4	802	68000 - 60000 BP	Bovid Size 2	-3.7	-2.9	Grazer		Roberts, P., Prendergast, M. E., Janzen, A., Shipton, C., Blinkhorn, J., Zech, J., . . . Boivin, N. (2020). Late Pleistocene to Holocene human palaeoecology in the tropical environments of coastal eastern Africa. Palaeogeography, Palaeoclimatology, Palaeoecology, 537, 109438. doi:https://doi.org/10.1016/j.palaeo.2019.109537
PYS	PYS	MIS4	802	68000 - 60000 BP	Bovid Size 2	-5.8	-3.4	Browser		Roberts, P., Prendergast, M. E., Janzen, A., Shipton, C., Blinkhorn, J., Zech, J., . . . Boivin, N. (2020). Late Pleistocene to Holocene human palaeoecology in the tropical environments of coastal eastern Africa. Palaeogeography, Palaeoclimatology, Palaeoecology, 537, 109438. doi:https://doi.org/10.1016/j.palaeo.2019.109538
PYS	PYS	MIS4	418	68000 - 60000 BP	Bovid Size 1 Madoqua sp.	-7.5	-2.7	Browser		Roberts, P., Prendergast, M. E., Janzen, A., Shipton, C., Blinkhorn, J., Zech, J., . . . Boivin, N. (2020). Late Pleistocene to Holocene human palaeoecology in the tropical environments of coastal eastern Africa. Palaeogeography, Palaeoclimatology, Palaeoecology, 537, 109438. doi:https://doi.org/10.1016/j.palaeo.2019.109539
PYS	PYS	MIS4	418	68000 - 60000 BP	Redunca redunca	0.4	-1.7	Grazer		Roberts, P., Prendergast, M. E., Janzen, A., Shipton, C., Blinkhorn, J., Zech, J., . . . Boivin, N. (2020). Late Pleistocene to Holocene human palaeoecology in the tropical environments of coastal eastern Africa. Palaeogeography, Palaeoclimatology, Palaeoecology, 537, 109438. doi:https://doi.org/10.1016/j.palaeo.2019.109540
PYS	PYS	MIS4	418	68000 - 60000 BP	Sylvicapra grimmia	-12.5	-5.4	Browser		Roberts, P., Prendergast, M. E., Janzen, A., Shipton, C., Blinkhorn, J., Zech, J., . . . Boivin, N. (2020). Late Pleistocene to Holocene human palaeoecology in the tropical environments of coastal eastern Africa. Palaeogeography, Palaeoclimatology, Palaeoecology, 537, 109438. doi:https://doi.org/10.1016/j.palaeo.2019.109541
PYS	PYS	MIS4	804	68000 - 60000 BP	Potamochoerus larvatus	-16.2	-5.8	Browser		Roberts, P., Prendergast, M. E., Janzen, A., Shipton, C., Blinkhorn, J., Zech, J., . . . Boivin, N. (2020). Late Pleistocene to Holocene human palaeoecology in the tropical environments of coastal eastern Africa. Palaeogeography, Palaeoclimatology, Palaeoecology, 537, 109438. doi:https://doi.org/10.1016/j.palaeo.2019.109542
PYS	PYS	MIS4	804	68000 - 60000 BP	Potamochoerus larvatus	-2.9	-7.1	Browser		Roberts, P., Prendergast, M. E., Janzen, A., Shipton, C., Blinkhorn, J., Zech, J., . . . Boivin, N. (2020). Late Pleistocene to Holocene human palaeoecology in the tropical environments of coastal eastern Africa. Palaeogeography, Palaeoclimatology, Palaeoecology, 537, 109438. doi:https://doi.org/10.1016/j.palaeo.2019.109543
PYS	PYS	MIS4	418	68000 - 60000 BP	Syncerus caffer	-2.9	-2.4	Grazer		Roberts, P., Prendergast, M. E., Janzen, A., Shipton, C., Blinkhorn, J., Zech, J., . . . Boivin, N. (2020). Late Pleistocene to Holocene human palaeoecology in the tropical environments of coastal eastern Africa. Palaeogeography, Palaeoclimatology, Palaeoecology, 537, 109438. doi:https://doi.org/10.1016/j.palaeo.2019.109544
PYS	PYS	MIS4	804	68000 - 60000 BP	Reduncine Size 2	0.7	-5	Grazer		Roberts, P., Prendergast, M. E., Janzen, A., Shipton, C., Blinkhorn, J., Zech, J., . . . Boivin, N. (2020). Late Pleistocene to Holocene human palaeoecology in the tropical environments of coastal eastern Africa. Palaeogeography, Palaeoclimatology, Palaeoecology, 537, 109438. doi:https://doi.org/10.1016/j.palaeo.2019.109545
PYS	PYS	MIS4	316	68000 - 60000 BP	Bovid Size 2-3	0.3	-1.9	Grazer		Roberts, P., Prendergast, M. E., Janzen, A., Shipton, C., Blinkhorn, J., Zech, J., . . . Boivin, N. (2020). Late Pleistocene to Holocene human palaeoecology in the tropical environments of coastal eastern Africa. Palaeogeography, Palaeoclimatology, Palaeoecology, 537, 109438. doi:https://doi.org/10.1016/j.palaeo.2019.109546
PYS	PYS	MIS4	316	68000 - 60000 BP	Bovid Size 3	-1	-0.3	Grazer		Roberts, P., Prendergast, M. E., Janzen, A., Shipton, C., Blinkhorn, J., Zech, J., . . . Boivin, N. (2020). Late Pleistocene to Holocene human palaeoecology in the tropical environments of coastal eastern Africa. Palaeogeography, Palaeoclimatology, Palaeoecology, 537, 109438. doi:https://doi.org/10.1016/j.palaeo.2019.109547
PYS	PYS	MIS4	316	68000 - 60000 BP	Bovid Size 1-2	-13.5	-5.4	Browser		Roberts, P., Prendergast, M. E., Janzen, A., Shipton, C., Blinkhorn, J., Zech, J., . . . Boivin, N. (2020). Late Pleistocene to Holocene human palaeoecology in the tropical environments of coastal eastern Africa. Palaeogeography, Palaeoclimatology, Palaeoecology, 537, 109438. doi:https://doi.org/10.1016/j.palaeo.2019.109548
PYS	PYS	MIS4	316	68000 - 60000 BP	Bovid Size 3	-2	-0.5	Grazer		Roberts, P., Prendergast, M. E., Janzen, A., Shipton, C., Blinkhorn, J., Zech, J., . . . Boivin, N. (2020). Late Pleistocene to Holocene human palaeoecology in the tropical environments of coastal eastern Africa. Palaeogeography, Palaeoclimatology, Palaeoecology, 537, 109438. doi:https://doi.org/10.1016/j.palaeo.2019.109549
PYS	PYS	MIS4	316	68000 - 60000 BP	Sylvicapra grimmia	-11.7	-3.7	Browser		Roberts, P., Prendergast, M. E., Janzen, A., Shipton, C., Blinkhorn, J., Zech, J., . . . Boivin, N. (2020). Late Pleistocene to Holocene human palaeoecology in the tropical environments of coastal eastern Africa. Palaeogeography, Palaeoclimatology, Palaeoecology, 537, 109438. doi:https://doi.org/10.1016/j.palaeo.2019.109550
PYS	PYS	MIS4	316	68000 - 60000 BP	Sylvicapra grimmia	-12.5	-2.2	Browser		Roberts, P., Prendergast, M. E., Janzen, A., Shipton, C., Blinkhorn, J., Zech, J., . . . Boivin, N. (2020). Late Pleistocene to Holocene human palaeoecology in the tropical environments of coastal eastern Africa. Palaeogeography, Palaeoclimatology, Palaeoecology, 537, 109438. doi:https://doi.org/10.1016/j.palaeo.2019.109551
PYS	PYS	MIS4	805	68000 - 60000 BP	Potamochoerus larvatus	-11.9	-7.2	Browser		Roberts, P., Prendergast, M. E., Janzen, A., Shipton, C., Blinkhorn, J., Zech, J., . . . Boivin, N. (2020). Late Pleistocene to Holocene human palaeoecology in the tropical environments of coastal eastern Africa. Palaeogeography, Palaeoclimatology, Palaeoecology, 537, 109438. doi:https://doi.org/10.1016/j.palaeo.2019.109552
PYS	PYS	MIS4	316	68000 - 60000 BP	Suid	-9.8	-2.9	Browser		Roberts, P., Prendergast, M. E., Janzen, A., Shipton, C., Blinkhorn, J., Zech, J., . . . Boivin, N. (2020). Late Pleistocene to Holocene human palaeoecology in the tropical environments of coastal eastern Africa. Palaeogeography, Palaeoclimatology, Palaeoecology, 537, 109438. doi:https://doi.org/10.1016/j.palaeo.2019.109553
PYS	PYS	MIS4	316	68000 - 60000 BP	Suid	-11.5	-0.9	Browser		Roberts, P., Prendergast, M. E., Janzen, A., Shipton, C., Blinkhorn, J., Zech, J., . . . Boivin, N. (2020). Late Pleistocene to Holocene human palaeoecology in the tropical environments of coastal eastern Africa. Palaeogeography, Palaeoclimatology, Palaeoecology, 537, 109438. doi:https://doi.org/10.1016/j.palaeo.2019.109554
PYS	PYS	MIS4	806	68000 - 60000 BP	Potamochoerus larvatus	-16.6	-5.3	Browser		Roberts, P., Prendergast, M. E., Janzen, A., Shipton, C., Blinkhorn, J., Zech, J., . . . Boivin, N. (2020). Late Pleistocene to Holocene human palaeoecology in the tropical environments of coastal eastern Africa. Palaeogeography, Palaeoclimatology, Palaeoecology, 537, 109438. doi:https://doi.org/10.1016/j.palaeo.2019.109555
PYS	PYS	MIS4	806	68000 - 60000 BP	Reduncine (Kobus sp.)	-1.5	-3.7	Grazer		Roberts, P., Prendergast, M. E., Janzen, A., Shipton, C., Blinkhorn, J., Zech, J., . . . Boivin, N. (2020). Late Pleistocene to Holocene human palaeoecology in the tropical environments of coastal eastern Africa. Palaeogeography, Palaeoclimatology, Palaeoecology, 537, 109438. doi:https://doi.org/10.1016/j.palaeo.2019.109556
PYS	PYS	MIS4	806	68000 - 60000 BP	Reduncine (size 3)	-1.4	-1.4	Grazer		Roberts, P., Prendergast, M. E., Janzen, A., Shipton, C., Blinkhorn, J., Zech, J., . . . Boivin, N. (2020). Late Pleistocene to Holocene human palaeoecology in the tropical environments of coastal eastern Africa. Palaeogeography, Palaeoclimatology, Palaeoecology, 537, 109438. doi:https://doi.org/10.1016/j.palaeo.2019.109557
PYS	PYS	MIS4	806	68000 - 60000 BP	Bovid size 3 Kobus	-0.5	-0.8	Grazer		Roberts, P., Prendergast, M. E., Janzen, A., Shipton, C., Blinkhorn, J., Zech, J., . . . Boivin, N. (2020). Late Pleistocene to Holocene human palaeoecology in the tropical environments of coastal eastern Africa. Palaeogeography, Palaeoclimatology, Palaeoecology, 537, 109438. doi:https://doi.org/10.1016/j.palaeo.2019.109558
PYS	PYS	MIS4	806	68000 - 60000 BP	Bovid Size 2	-1.1	-2.1	Grazer		Roberts, P., Prendergast, M. E., Janzen, A., Shipton, C., Blinkhorn, J., Zech, J., . . . Boivin, N. (2020). Late Pleistocene to Holocene human palaeoecology in the tropical environments of coastal eastern Africa. Palaeogeography, Palaeoclimatology, Palaeoecology, 537, 109438. doi:https://doi.org/10.1016/j.palaeo.2019.109559
PYS	PYS	MIS5	316	78000 - 73000 BP	Tragelaphus scriptus	-11.3	-3	Browser		Roberts, P., Prendergast, M. E., Janzen, A., Shipton, C., Blinkhorn, J., Zech, J., . . . Boivin, N. (2020). Late Pleistocene to Holocene human palaeoecology in the tropical environments of coastal eastern Africa. Palaeogeography, Palaeoclimatology, Palaeoecology, 537, 109438. doi:https://doi.org/10.1016/j.palaeo.2019.109560
PYS	PYS	MIS5	316	78000 - 73000 BP	Sylvicapra grimmia	-9	-1.5	Browser		Roberts, P., Prendergast, M. E., Janzen, A., Shipton, C., Blinkhorn, J., Zech, J., . . . Boivin, N. (2020). Late Pleistocene to Holocene human palaeoecology in the tropical environments of coastal eastern Africa. Palaeogeography, Palaeoclimatology, Palaeoecology, 537, 109438. doi:https://doi.org/10.1016/j.palaeo.2019.109561
PYS	PYS	MIS5	420	78000 - 73000 BP	Sylvicapra grimmia	-12.7	-3.4	Browser		Roberts, P., Prendergast, M. E., Janzen, A., Shipton, C., Blinkhorn, J., Zech, J., . . . Boivin, N. (2020). Late Pleistocene to Holocene human palaeoecology in the tropical environments of coastal eastern Africa. Palaeogeography, Palaeoclimatology, Palaeoecology, 537, 109438. doi:https://doi.org/10.1016/j.palaeo.2019.109562
PYS	PYS	MIS5	316	78000 - 73000 BP	Suid	-14.4	-6.2	Browser		Roberts, P., Prendergast, M. E., Janzen, A., Shipton, C., Blinkhorn, J., Zech, J., . . . Boivin, N. (2020). Late Pleistocene to Holocene human palaeoecology in the tropical environments of coastal eastern Africa. Palaeogeography, Palaeoclimatology, Palaeoecology, 537, 109438. doi:https://doi.org/10.1016/j.palaeo.2019.109563
PYS	PYS	MIS5	420	78000 - 73000 BP	Suid	-13.1	-3.1	Browser		Roberts, P., Prendergast, M. E., Janzen, A., Shipton, C., Blinkhorn, J., Zech, J., . . . Boivin, N. (2020). Late Pleistocene to Holocene human palaeoecology in the tropical environments of coastal eastern Africa. Palaeogeography, Palaeoclimatology, Palaeoecology, 537, 109438. doi:https://doi.org/10.1016/j.palaeo.2019.109564
PYS	PYS	MIS5	808	78000 - 73000 BP	Cercopithecinae	-13.5	-5.2	Omnivore		Roberts, P., Prendergast, M. E., Janzen, A., Shipton, C., Blinkhorn, J., Zech, J., . . . Boivin, N. (2020). Late Pleistocene to Holocene human palaeoecology in the tropical environments of coastal eastern Africa. Palaeogeography, Palaeoclimatology, Palaeoecology, 537, 109438. doi:https://doi.org/10.1016/j.palaeo.2019.109565
PYS	PYS	MIS5	808	78000 - 73000 BP	Cercopithecinae	-14.5	-6.7	Omnivore		Roberts, P., Prendergast, M. E., Janzen, A., Shipton, C., Blinkhorn, J., Zech, J., . . . Boivin, N. (2020). Late Pleistocene to Holocene human palaeoecology in the tropical environments of coastal eastern Africa. Palaeogeography, Palaeoclimatology, Palaeoecology, 537, 109438. doi:https://doi.org/10.1016/j.palaeo.2019.109566
